# Supplementary material for: Complications following vaginal mesh procedures for stress urinary incontinence: an 8 year study of 92,246 women
Source: PubMed Central journal article supplement (PMC5607307; doi:10.1038/s41598-017-11821-w), 2017-09-20

Complications following vaginal mesh procedures for stress  
urinary incontinence: an 8 year study of 92,246 women

Kim Keltie, Sohier Elneil, Ashwani Monga, Hannah Patrick,  
John Powell, Bruce Campbell, Andrew J Sims

Supplementary Information

Supplementary Table S1: List of procedure (OPCS-4) and diagnosis (ICD10) codes used during analysis ('.x' represents any number from 0 to 9 indicating that the whole chapter is used). OPCS-4 codes can appear in any of the 24 procedure fields in HES; ICD10 codes can appear in any of the 20 diagnosis fields in HES.

| <i>OPCS-4 Code</i> | <i>OPCS-4 Description</i>                                                    |
|--------------------|------------------------------------------------------------------------------|
| M30.2              | Endoscopic catheterisation of ureter                                         |
| M38.2              | Cystostomy and insertion of suprapubic tube into bladder                     |
| M45.x              | Diagnostic endoscopic examination of bladder                                 |
| M47.1              | Urethral irrigation of bladder                                               |
| M47.4              | Urodynamic studies using catheter                                            |
| M47.8              | Urethral catheterisation of bladder – other specified                        |
| M47.9              | Urethral catheterisation of bladder – unspecified                            |
| M48.1              | Suprapubic aspiration of bladder                                             |
| M52.1              | Suprapubic sling operation                                                   |
| M52.8              | Abdominal operations to support outlet of female bladder – other specified   |
| M53.3              | Introduction of tension-free vaginal tape                                    |
| M53.4              | Total removal of tension-free vaginal tape                                   |
| M53.5              | Partial removal of tension-free vaginal tape                                 |
| M53.6              | Introduction of transobturator tape                                          |
| M53.7              | Removal of transobturator tape                                               |
| M53.8              | Vaginal operations to support outlet of female bladder – other specified     |
| M77.x              | Diagnostic endoscopic examination of urethra                                 |
| P23.6              | Anterior colporrhaphy with mesh reinforcement                                |
| P23.7              | Posterior colporrhaphy with mesh reinforcement                               |
| P24.2              | Sacrocolpopexy                                                               |
| P24.5              | Repair of vault of vagina with mesh using abdominal approach                 |
| P24.6              | Repair of vault of vagina with mesh using vaginal approach                   |
| Q54.4              | Suspension of uterus using mesh, not elsewhere classified                    |
| Q54.5              | Sacrohysteropexy                                                             |
| Q54.6              | Infracoccygeal hysteropexy                                                   |
| Y03.1              | Maintenance of prosthesis in organ, Not Otherwise Classifiable               |
| Y03.2              | Renewal of prosthesis in organ Not Otherwise Classifiable                    |
| Y03.3              | Correction of displacement of prosthesis, Not Otherwise Classifiable         |
| Y03.4              | Other resiting of prosthesis in organ, Not Otherwise Classifiable            |
| Y03.6              | Adjustment to prosthesis in organ, Not Otherwise Classifiable                |
| Y03.7              | Removal of prosthesis from organ, Not Otherwise Classifiable                 |
| Y03.8              | Other specified attention to prosthesis in organ, Not Otherwise Classifiable |
| Y03.9              | Unspecified attention to prosthesis in organ, Not Otherwise Classifiable     |
| Y26.4              | Removal of other repair material from organ Not Otherwise Classifiable       |
| Y26.5              | Other attention to repair of organ, Not Otherwise Classifiable               |
| Y71.2              | Secondary operations, Not Otherwise Classifiable                             |
| Y71.3              | Revisional operations, Not Otherwise Classifiable                            |
| Y71.6              | Second revisional operation, Not Otherwise Classifiable                      |
| Y71.7              | Third or greater revisional operation, Not Otherwise Classifiable            |
| <i>ICD10 Code</i>  | <i>ICD10 Description</i>                                                     |
| N39.3              | Stress incontinence                                                          |
| N39.4              | Other specified urinary incontinence                                         |
| N93.x              | Other abnormal uterine and vaginal bleeding                                  |
| N94.1              | Other abnormal uterine and vaginal bleeding                                  |
| N99.8              | Other postprocedural disorders of genitourinary system                       |
| N99.9              | Postprocedural disorder of genitourinary system, unspecified                 |
| R10.0              | Abdominal and pelvic pain – acute abdomen                                    |
| R10.2              | Pelvic and perineal pain                                                     |
| R10.3              | Pain localized to other parts of lower abdomen                               |
| R10.4              | Other and unspecified abdominal pain                                         |

continued ...

... continued

| <i>ICD10 Code</i> | <i>ICD10 Description</i>                                                                                                                 |
|-------------------|------------------------------------------------------------------------------------------------------------------------------------------|
| R30.x             | Pain associated with micturition                                                                                                         |
| R31.x             | Unspecified haematuria                                                                                                                   |
| R32.x             | Unspecified urinary incontinence                                                                                                         |
| R33.x             | Retention of urine                                                                                                                       |
| R34.x             | Anuria and oliguria                                                                                                                      |
| R35.x             | Polyuria                                                                                                                                 |
| R36.x             | Urethral discharge                                                                                                                       |
| R39.x             | Other symptoms and signs involving the urinary system                                                                                    |
| S34.5             | Injury of lumbar, sacral and pelvic sympathetic nerves                                                                                   |
| S34.6             | Injury of peripheral nerve(s) of abdomen, lower back and pelvis                                                                          |
| S34.8             | Injury of other and unspecified nerves at abdomen, lower back and pelvis level                                                           |
| S35.7             | Injury of multiple blood vessels at abdomen, lower back and pelvis level                                                                 |
| S35.8             | Injury of other blood vessels at abdomen, lower back and pelvis level                                                                    |
| S35.9             | Injury of unspecified blood vessel at abdomen, lower back and pelvis level                                                               |
| S36.5             | Injury of colon                                                                                                                          |
| S36.7             | Injury of multiple intra-abdominal organs                                                                                                |
| S36.8             | Injury of other intra-abdominal organs                                                                                                   |
| S36.9             | Injury of unspecified intra-abdominal organ                                                                                              |
| S37.0             | Injury of kidney                                                                                                                         |
| S37.1             | Injury of ureter                                                                                                                         |
| S37.2             | Injury of bladder                                                                                                                        |
| S37.3             | Injury of urethra                                                                                                                        |
| S37.7             | Injury of multiple pelvic organs                                                                                                         |
| S37.8             | Injury of other pelvic organs                                                                                                            |
| S37.9             | Injury of unspecified pelvic organ                                                                                                       |
| S39.x             | Other and unspecified injuries of abdomen, lower back and pelvis                                                                         |
| T81.x             | Complications of procedures, not elsewhere classified                                                                                    |
| T83.1             | Mechanical complication of other urinary devices and implants                                                                            |
| T83.4             | Mechanical complication of other prosthetic devices, implants and grafts in genital tract                                                |
| T83.5             | Infection and inflammatory reaction due to prosthetic device, implant and graft in urinary system                                        |
| T83.6             | Infection and inflammatory reaction due to prosthetic device, implant and graft in genital tract                                         |
| T83.8             | Other complications of genitourinary prosthetic devices, implants and grafts                                                             |
| T83.9             | Unspecified complication of genitourinary prosthetic device, implant and graft                                                           |
| T85.6             | Mechanical complication of other specified internal prosthetic devices, implants and grafts                                              |
| T85.7             | Infection and inflammatory reaction due to other internal prosthetic devices, implants and grafts                                        |
| T85.8             | Other complications of internal prosthetic devices, implants and grafts, not elsewhere classified                                        |
| T85.9             | Unspecified complication of internal prosthetic device, implant and graft                                                                |
| Y60.0             | During surgical operation                                                                                                                |
| Y60.8             | During other surgical and medical care                                                                                                   |
| Y73.2             | Gastroenterology and urology devices associated with adverse incidents - Prosthetic and other implants, materials and accessory devices  |
| Y73.3             | Gastroenterology and urology devices associated with adverse incidents - Surgical instruments, materials and devices (including sutures) |
| Y83.1             | Surgical operation with implant of artificial internal device                                                                            |
| Z46.6             | Fitting and adjustment of urinary device                                                                                                 |

Supplementary Table S2: Definition of surgical mesh removals, repairs, renewals and insertions using OPCS-4 procedure codes.

| <i>Surgical mesh procedure</i> | <i>OPCS-4 procedure code combinations</i>                                                                                                                                                                                                                                                                                                                                                                              |
|--------------------------------|------------------------------------------------------------------------------------------------------------------------------------------------------------------------------------------------------------------------------------------------------------------------------------------------------------------------------------------------------------------------------------------------------------------------|
| Removal                        | Main codes (M53.4 or M53.5 or M53.7), or main codes (M53.3 or M53.6 or M52.1 or M53.8* or M52.8*) qualified by (Y03.7 or Y26.4) supplementary codes.                                                                                                                                                                                                                                                                   |
| Repair                         | Main codes (M53.3, M53.6, M52.1, M53.8*, M52.8*) qualified by (Y71.2 or Y71.3 or Y71.6 or Y71.7 or Y26.5 or Y03.1 or Y03.3 or Y03.4 or Y03.6 or Y03.8 or Y03.9) supplementary codes.                                                                                                                                                                                                                                   |
| Renewal                        | Main codes (M53.3, M53.6, M52.1, M53.8*, M52.8*) qualified by Y03.2 supplementary code.                                                                                                                                                                                                                                                                                                                                |
| Insertion                      | The supplementary OPCS code, Y03.2, used to identify renewals is not well utilised (as confirmed by survey of clinical coders across England). Therefore patients with repeated occurrences of any insertion main code (M53.3, M53.6, M52.1) which were <u>not</u> followed by the supplementary codes defined in the repairs, removals and renewals, were deemed to have multiple surgical mesh insertion procedures. |

\* codes used only during post-procedural analysis

Supplementary Table S3: List of OPCS-4 procedure codes considered not to influence outcomes if performed during an index procedure ('.x' represents any number from 0 to 9 indicating that the whole chapter is used)

| <i>Category</i>                                        | <i>OPCS-4 codes</i>                        | <i>Description</i>                                      |
|--------------------------------------------------------|--------------------------------------------|---------------------------------------------------------|
| Diagnostic endoscopic examinations                     | A55.x                                      | Diagnostic spinal puncture                              |
|                                                        | L72.x                                      | Diagnostic transluminal operations on other artery      |
|                                                        | L95.x                                      | Diagnostic transluminal operations on vein              |
|                                                        | M11.x                                      | Diagnostic endoscopic examination of kidney             |
|                                                        | M30.x                                      | Diagnostic endoscopic examination of ureter             |
|                                                        | M45.x                                      | Diagnostic endoscopic examination of bladder            |
|                                                        | M77.x                                      | Diagnostic endoscopic examination of urethra            |
|                                                        | M85.x                                      | Diagnostic endoscopic examination of urinary diversion  |
|                                                        | Q18.x                                      | Diagnostic endoscopic examination of uterus             |
|                                                        | Q39.x                                      | Diagnostic endoscopic examination of fallopian tube     |
| Q50.x                                                  | Diagnostic endoscopic examination of ovary |                                                         |
| Diagnostic imaging, testing and rehabilitation methods | A84.3                                      | Nerve conduction studies                                |
|                                                        | H44.4                                      | Examination of rectum under anaesthetic                 |
|                                                        | M49.6                                      | Micturating cystography                                 |
|                                                        | P27.3                                      | Colposcopy of vagina                                    |
|                                                        | Q55.x                                      | Other examination of female genital tract               |
|                                                        | U01.x-U21.x                                | Diagnostic imaging                                      |
|                                                        | U22.x-U40.x                                | Diagnostic testing                                      |
|                                                        | U50.x-U54.x                                | Rehabilitation                                          |
|                                                        | Y93.x                                      | Gallium-67 imaging                                      |
|                                                        | Y94.x                                      | Radiopharmaceutical imaging                             |
|                                                        | Y97.x                                      | Radiology with contrast                                 |
| Y98.x                                                  | Radiology procedures                       |                                                         |
| Exploration                                            | M83.2                                      | Exploration of retropubic space                         |
|                                                        | P27.8                                      | Other specified exploration of vagina                   |
|                                                        | S57.8                                      | Other specified exploration of other skin of other site |
|                                                        | T31.7                                      | Exploration of groin NEC                                |
|                                                        | Y31.x                                      | Exploration of organ NOC                                |
|                                                        | Y32.x                                      | Re-exploration of organ NOC                             |
| Non-operations                                         | E85.x-E98.x                                | Non operations on lower respiratory tract               |
|                                                        | Y90.x                                      | Other non-operations                                    |
|                                                        | Y92.x                                      | Support for preparation for radiotherapy                |
|                                                        | Y99.x                                      | Donor status                                            |
| Methods of operation                                   | Y02.x                                      | Placement of prosthesis in organ NOC                    |
|                                                        | Y21.x                                      | Cytology of organ NOC                                   |
|                                                        | Y22.x                                      | Drainage of organ NOC                                   |
|                                                        | Y25.x                                      | Suture of organ NOC                                     |
|                                                        | Y41.x                                      | Examination of organ NOC                                |
| Approach to organ                                      | Y50.x                                      | Approach through abdominal cavity                       |
|                                                        | Y52.x                                      | Approach to organ through other opening                 |
|                                                        | Y53.x                                      | Approach to organ under image control                   |
|                                                        | Y75.x                                      | Minimal access to abdominal cavity                      |
|                                                        | Y76.x                                      | Minimal access to other body cavity                     |
| Staged procedures                                      | Y70.x                                      | Early operations NOC                                    |
| Anaesthetic                                            | Y80.x                                      | General anaesthetic                                     |
|                                                        | Y81.x                                      | Spinal anaesthetic                                      |
|                                                        | Y82.x                                      | Local anaesthetic                                       |
|                                                        | Y84.x                                      | Other anaesthetic                                       |

continued ...

... continued

| <i>Category</i>           | <i>OPCS-4 codes</i>               | <i>Description</i>                                                 |
|---------------------------|-----------------------------------|--------------------------------------------------------------------|
| Sites of operation        | O16.1                             | Pelvis NEC                                                         |
|                           | Z31.x                             | Other abdominal organ                                              |
|                           | Z41.x                             | Upper urinary tract                                                |
|                           | Z42.x                             | Lower urinary tract                                                |
|                           | Z44.x                             | Vagina                                                             |
|                           | Z53.x                             | Abdominal wall                                                     |
| Therapeutic interventions | A52.x                             | Therapeutic epidural injection                                     |
|                           | L91.2                             | Insertion of central venous catheter NEC                           |
|                           | L91.4                             | Removal of central venous catheter                                 |
|                           | L99.7                             | Percutaneous transluminal peripheral insertion of central catheter |
|                           | M47.x                             | Urethral catheterisation of bladder                                |
|                           | M49.2                             | Change of suprapubic tube into bladder                             |
|                           | M49.3                             | Removal of suprapubic tube from bladder                            |
|                           | S42.1                             | Primary suture of skin NEC                                         |
|                           | S42.2                             | Delayed primary suture of skin NEC                                 |
|                           | S42.3                             | Secondary suture of skin NEC                                       |
|                           | S42.8                             | Other specified suture of skin of other site                       |
|                           | S42.9                             | Unspecified suture of skin of other site                           |
|                           | S47.6                             | Incision of skin NEC                                               |
|                           | S57.4                             | Dressing of skin NEC                                               |
|                           | S57.5                             | Attention to dressing of skin NEC                                  |
|                           | S57.6                             | Cleansing and sterilisation of skin NEC                            |
|                           | S57.7                             | Dressing of skin using vacuum assisted closure device NEC          |
|                           | X29.2                             | Continuous intravenous infusion of therapeutic substance NEC       |
|                           | X30.8                             | Other specified injection of therapeutic substance                 |
|                           | X30.9                             | Unspecified injection of therapeutic substance                     |
| X31.2                     | Intravenous pyelography           |                                                                    |
| X56.9                     | Unspecified intubation of trachea |                                                                    |

Supplementary Table S4: List of OPCS-4 procedure codes considered to be rescue procedures associated with complications caused by the index mesh insertion procedure.

| <i>OPCS-4 codes</i> | <i>OPCS-4 description</i>                                                                                               |
|---------------------|-------------------------------------------------------------------------------------------------------------------------|
| E42.3               | Temporary tracheostomy                                                                                                  |
| E42.7               | Removal of tracheostomy tube                                                                                            |
| L70.3               | Ligation of artery not elsewhere classified                                                                             |
| M37.3               | Repair of rupture of bladder                                                                                            |
| M37.8               | Other specified other repair of bladder                                                                                 |
| M37.9               | Unspecified other repair of bladder                                                                                     |
| M39.2               | Open removal of foreign body from bladder                                                                               |
| M42.2               | Endoscopic cauterisation of lesion of bladder                                                                           |
| M44.3               | Endoscopic removal of foreign body from bladder                                                                         |
| M44.4               | Endoscopic removal of blood clot from bladder                                                                           |
| M73.7               | Repair of rupture of urethra not elsewhere classified                                                                   |
| M73.8               | Other specified repair of urethra                                                                                       |
| M73.9               | Unspecified repair of urethra                                                                                           |
| P20.3               | Cauterisation of lesion of vagina                                                                                       |
| P27.1               | Evacuation of haematoma from vagina                                                                                     |
| P29.4               | Removal of foreign body from vagina                                                                                     |
| S11.1               | Cauterisation of lesion of skin not elsewhere classified                                                                |
| S42.4               | Resuture of skin not elsewhere classified                                                                               |
| S57.1               | Debridement of skin not elsewhere classified                                                                            |
| T30.1               | Reopening of abdomen and re-exploration of intra-abdominal operation site and surgical arrest of postoperative bleeding |
| T30.2               | Reopening of abdomen and re-exploration of intra-abdominal operation site not elsewhere classified                      |
| T30.3               | Reopening of abdomen not elsewhere classified                                                                           |
| T30.4               | Opening of abdomen and exploration of groin                                                                             |
| T30.8               | Other specified opening of abdomen                                                                                      |
| T30.9               | Unspecified opening of abdomen                                                                                          |
| X33.2               | Intravenous blood transfusion of packed cells                                                                           |
| X33.9               | Unspecified other blood transfusion                                                                                     |
| X34.1               | Transfusion of coagulation factor                                                                                       |
| X34.2               | Transfusion of plasma not elsewhere classified                                                                          |
| X35.5               | Intravenous injection of antimicrobial therapy                                                                          |
| X40.3               | Haemodialysis not elsewhere classified                                                                                  |
| X40.4               | Haemofiltration                                                                                                         |
| X50.1               | Direct current cardioversion                                                                                            |
| X50.2               | External cardioversion not elsewhere classified                                                                         |
| X50.3               | Advanced cardiac pulmonary resuscitation                                                                                |
| X50.9               | Unspecified external resuscitation                                                                                      |

Supplementary File S5: R code for data manipulation and analysis. Scripts and functions, written in the R programming language, are provided in the interests of reproducibility.

## S5.1 Introduction

### S5.1.1 R code

The code consists of a main script which executes a series of separate scripts (§S5.2) for each step in the analysis. Helper functions, used repeatedly during the analysis, are also provided (§S5.3). The scripts create a log file containing the main results and write interim data frames at each step. A complete analysis of approximately 500,000 HES episodes takes about 25 minutes to complete on a typical desktop PC.

### S5.1.2 HES data

The HES records on which the code operates are available from NHS Digital, subject to their rules concerning requests for episode-level data. Only selected HES fields from the “inpatient universe” are used in this analysis - the non-NULL ones listed in `import.R`. Specifically, using HES terminology: FYEAR, PSEUDO\_HESID, ADMIDATE, ADMIMETH, DIAG\_4\_CONCAT, DISDATE, DISDEST, DISMETH, EPIEND, EPISTART, OPERTN\_4\_CONCAT, PROCODE3, SEX, STARTAGE.

## S5.2 Scripts for each step of analysis

### S5.2.1 main.R

```
# -----  
# main.R  
#  
# Description:  
# =====  
# Runs all steps in mesh/sui analysis.  
#  
# History:  
# =====  
# 23.02.2015. A.J. Sims. Created.  
# -----  
  
# clean up  
rm(list=ls())  
  
# send output to a file  
logfile <- paste("log/", format(Sys.time(), "%Y%m%d%H%M%S"), ".log", sep='')  
sink(file=logfile, append=F, split=T)  
cat(format(Sys.time(), "%Y-%m-%d %H:%M:%S"), "\n")  
rv <- R.Version()  
cat(rv$version.string, "\n\n")  
  
# create 'suiipop.Rdata' from CSV dump of HES searches  
source("import.R", local=T)  
  
# create cohort data sets for SUI and POP indications  
# as if separate HES searches had been done  
source("cohorts.R", local=T)  
  
# extract raw activity data from uncleaned data in 'sui.Rdata'  
source("activity.R", local=T)  
  
# clean 'sui.Rdata' and save to 'sui-cleaned.Rdata'  
source("clean.R", local=T)
```



```

# identify index procedures
source("indexprocs.R", local=T)

# split cohort into confounded and unconfounded
source("split.R", local=T)

# peri-procedural complications
source("pericomp.R", local=T)

# analysis of 30 day readmissions
source("thirty.R")

# generate post-procedure event tables
source("postproc.R", local=T)

# survival analysis
source("history.R", local=T)

# overall safety analysis
source("safety.R", local=T)

# stop output
cat("\n")
cat(format(Sys.time(), "%Y-%m-%d %H:%M:%S"), "\n\n")
sink()
rm(list=ls())

```

## S5.2.2 import.R

```

# -----
# import.R
#
# Description:
# =====
# Reads raw HES search, filters fields and saves as data frame in an .Rdata
# file.
#
# History:
# =====
# 23.02.2015. A.J. Sims. Created.
# 12.03.2015. A.J. Sims. Added spell id, and separated DIAG and OPERTN into
# lists within the data frame.
# 31.03.2015. A.J. Sims. Episodes given unique labels (row names).
# 29.06.2015. A.J. Sims. Creates combined SUI+POP data frame.
# 10.08.2015. A.J. Sims. Updated regular expression.
# 07.12.2015. A.J. Sims. Minor changes to fields for 0708-1415 dataset.
# -----

# clear workspace...
rm(list=ls())

cat('HES extract\n')
cat('-----\n')

# source of episodes
where <- "sql"

# -----
# read from CSV
# -----
if (where == "csv") {

```

```

# which HES search?
path <- "S:/hes/kim/MESH"
file <- "20151126_RX029_MESH_0708_1415_M533M536M521_allep.csv"
cat(file, '\n\n')

# block size to read...
nrows <- -1

# define some classes and methods for colClasses in read...
setClass("HESDate")
setAs("character", "HESDate", function(from) as.Date(from, format="%d%b%Y"))

# define column classes, to permit processing on input...
colClasses=c(
  FYEAR="character",
  EPIKEY="NULL",
  PSEUDO_HESID="factor",
  ADMIDATE="HESDate",
  ADMIMETH="factor",
  DIAG_4_01="NULL",
  DIAG_4_02="NULL",
  DIAG_4_03="NULL",
  DIAG_4_04="NULL",
  DIAG_4_05="NULL",
  DIAG_4_06="NULL",
  DIAG_4_07="NULL",
  DIAG_4_08="NULL",
  DIAG_4_09="NULL",
  DIAG_4_10="NULL",
  DIAG_4_11="NULL",
  DIAG_4_12="NULL",
  DIAG_4_13="NULL",
  DIAG_4_14="NULL",
  DIAG_4_15="NULL",
  DIAG_4_16="NULL",
  DIAG_4_17="NULL",
  DIAG_4_18="NULL",
  DIAG_4_19="NULL",
  DIAG_4_20="NULL",
  DIAG_4_CONCAT="character", # 0708-1415 only, not used in analysis
  DIAG_COUNT="NULL",
  DISDATE="HESDate",
  DISDEST="integer",
  DISMETH="integer",
  EPIDUR="NULL",
  EPIEND="HESDate",
  EPIORDER="NULL",
  EPISTART="HESDate",
  EPISTAT="NULL", # 0708-1415 only, not used in analysis
  EPITYPE="NULL", # 0708-1415 only, not used in analysis
  FCE="NULL",
  OPERTN_4_01="NULL",
  OPERTN_4_02="NULL",
  OPERTN_4_03="NULL",
  OPERTN_4_04="NULL",
  OPERTN_4_05="NULL",
  OPERTN_4_06="NULL",
  OPERTN_4_07="NULL",
  OPERTN_4_08="NULL",
  OPERTN_4_09="NULL",
  OPERTN_4_10="NULL",
  OPERTN_4_11="NULL",

```

```

OPERTN_4_12="NULL",
OPERTN_4_13="NULL",
OPERTN_4_14="NULL",
OPERTN_4_15="NULL",
OPERTN_4_16="NULL",
OPERTN_4_17="NULL",
OPERTN_4_18="NULL",
OPERTN_4_19="NULL",
OPERTN_4_20="NULL",
OPERTN_4_21="NULL",
OPERTN_4_22="NULL",
OPERTN_4_23="NULL",
OPERTN_4_24="NULL",
OPERTN_4_CONCAT="character",
OPDATE_01="NULL",
OPDATE_02="NULL",
OPDATE_03="NULL",
OPDATE_04="NULL",
OPDATE_05="NULL",
OPDATE_06="NULL",
OPDATE_07="NULL",
OPDATE_08="NULL",
OPDATE_09="NULL",
OPDATE_10="NULL",
OPDATE_11="NULL",
OPDATE_12="NULL",
OPDATE_13="NULL",
OPDATE_14="NULL",
OPDATE_15="NULL",
OPDATE_16="NULL",
OPDATE_17="NULL",
OPDATE_18="NULL",
OPDATE_19="NULL",
OPDATE_20="NULL",
OPDATE_21="NULL",
OPDATE_22="NULL",
OPDATE_23="NULL",
OPDATE_24="NULL",
OPERTN_COUNT="NULL", # 0708-1415 only, not used in analysis
PROCEDURE3="factor",
#ORG_DESCRIPTION="NULL", # 0708-1314 only, not used in analysis
SEX="integer",
SPELBGIN="NULL",
SPELDUR="NULL",
SPELDUR_CALC="NULL",
SPELEND="NULL",
STARTAGE="integer",
STARTAGE_CALC="NULL",
SUSSPELLID="NULL"
)

# read and convert...
SP <- read.csv(file=paste(path, file, sep='/'),
               header=TRUE,
               row.names=NULL,
               na.strings=c("NA", "01JAN1800", "01JAN1801"),
               strip.white=T,
               colClasses=colClasses,
               nrow=nrow)

# drop first data row for 14/15 data set
SP <- SP[-c(1),]
}

```

```

# -----
# read from SQL
# -----
if (where=="sql") {

  # load RODBC library
  library("RODBC")

  # data source and table name
  dsn <- "HES Archive"
  table.name = c("20151126_RX029_MESH_0708_1415_M533M536M521_allep")
  cat("SQL table:", table.name, '\n')

  # establish database connection
  con <- odbcConnect(dsn,
                    interpretDot=FALSE,
                    case="nochange"
  )

  # find size of results set
  df.temp <- sqlQuery(channel=con,
                    query=paste("SELECT COUNT(*) AS NROW FROM", table.name, sep=' '),
                    bufsize=1,
                    rows_at_time=1,
                    max=1)
  bufsize <- as.integer(df.temp$NROW[1])
  cat(bufsize, "rows in table", table.name, '\n')

  # NA strings
  na.strings <- c("NA", "", "0000-00-00", "1800-01-01", "1801-01-01")

  # query into a data frame
  qry <- paste("SELECT",
              "FYEAR,",
              "PSEUDO_HESID,",
              "STR_TO_DATE(ADMIDATE, '%d%b%Y') AS ADMIDATE,",
              "ADMIMETH,",
              "DIAG_4_CONCAT,",
              "STR_TO_DATE(DISDATE, '%d%b%Y') AS DISDATE,",
              "DISDEST,",
              "DISMETH,",
              "STR_TO_DATE(EPIEND, '%d%b%Y') AS EPIEND,",
              "STR_TO_DATE(EPISTART, '%d%b%Y') AS EPISTART,",
              "OPERTN_4_CONCAT,",
              "PROCEDURE3,",
              "SEX,",
              "STARTAGE",
              "FROM",
              table.name,
              sep=' '
  )
  SP <- sqlQuery(channel=con,
                query=qry,
                as.is=c(1,5,11), # fields to leave as character
                rows_at_time=1,
                na.strings=na.strings
  )

  # close database connection
  odbcCloseAll()

  # drop first data row for 14/15 data set

```

```

SP <- SP[-c(1),]
cat("\n")
}

# Add a column which defines a unique episode ID. This is useful in
# later analysis to keep track of individual episodes.
SP$EPI_ID <- paste('E', rownames(SP), sep='')

# convert FYEAR to factor (blank = NA)
SP$FYEAR[SP$FYEAR==''] <- NA
SP$FYEAR <- as.factor(SP$FYEAR)

# clean (as per HES data dictionary)...
SP$STARTAGE[SP$STARTAGE>7000] <- 0 # babies < 1 year

# convert procedures and diagnoses to list...
SP$OPERTN <- strsplit(SP$OPERTN_4_CONCAT, ',')
SP$OPERTN_4_CONCAT <- NULL

SP$DIAG <- strsplit(SP$DIAG_4_CONCAT, ',')
SP$DIAG_4_CONCAT <- NULL

# spells...
SP$SPELL <- as.integer(as.factor(
  paste(SP$PSEUDO_HESID,
        SP$ADMIDATE,
        SP$ADMIMETH,
        SP$PROCEDURE3,
        sep='+')
))

# save it...
save(file="data/suipop.Rdata", SP)

# raw data summary...
cat("Raw data\n-----\n")
cat(nrow(SP), "episodes\n")
PATIENTS <- unique(SP$PSEUDO_HESID)
cat(length(PATIENTS), "patients\n")

# basic checks...
cat("\n")
cat("Checks on data:\n-----\n")
cat("ADMIDATE range: ", as.character(min(SP$ADMIDATE, na.rm=TRUE)),
    as.character(max(SP$ADMIDATE, na.rm=TRUE)), '\n')
cat("DISDATE range: ", as.character(min(SP$DISDATE, na.rm=TRUE)),
    as.character(max(SP$DISDATE, na.rm=TRUE)), '\n')
cat("EPIEND range: ", as.character(min(SP$EPIEND, na.rm=TRUE)),
    as.character(max(SP$EPIEND, na.rm=TRUE)), '\n')
cat("EPISTART range: ", as.character(min(SP$EPISTART, na.rm=TRUE)),
    as.character(max(SP$EPISTART, na.rm=TRUE)), '\n')

cat("FYEAR values: ")
print(unique(SP$FYEAR))

cat("ADMIMETH values:")
print(unique(SP$ADMIMETH))

cat("DISDEST values:")
print(unique(SP$DISDEST))

cat("DISMETH values:")
print(unique(SP$DISMETH))

```

```

cat("SEX values:")
print(unique(SP$SEX))

cat("STARTAGE range:", min(SP$STARTAGE, na.rm=TRUE), max(SP$STARTAGE, na.rm=TRUE), '\n')

# bad OPERTN or DIAG codes
pattern <- "[[:upper:]][[:digit:]]{2}[X[:digit:]]{1}$" # e.g. A001, P232, I10X

all.OPERTN <- unlist(SP$OPERTN)
all.OPERTN <- all.OPERTN[!is.na(all.OPERTN)]
bad.OPERTN <- grep(pattern, all.OPERTN, invert=T)
cat(length(bad.OPERTN), "bad OPERTN codes out of", length(SP$OPERTN), "episodes\n")
ct <- as.data.frame(table(all.OPERTN[bad.OPERTN]))
if (nrow(ct)>0) {
  names(ct) <- c('code', 'freq')
  print(ct, row.names=F)
}

all.DIAG <- unlist(SP$DIAG)
all.DIAG <- all.DIAG[!is.na(all.DIAG)]
bad.DIAG <- grep(pattern, all.DIAG, invert=T)
cat(length(bad.DIAG), "bad DIAG codes out of", length(SP$DIAG), "episodes\n")
ct <- as.data.frame(table(unlist(SP$DIAG)[bad.DIAG]))
if (nrow(ct)>0) {
  names(ct) <- c('code', 'freq')
  print(ct, row.names=F)
}

cat("Bad ICD-10 codes:\n")
ct <- as.data.frame(table(all.DIAG[bad.DIAG]))
if (nrow(ct)>0) {
  names(ct) <- c('code', 'freq')
  print(ct, row.names=F)
}
cat('\n\n')

rm(list=ls())

```

### S5.2.3 cohorts.R

```

# -----
# cohorts.R
#
# Description:
# =====
# Creates cohorts based on mesh/tape from suipop.Rdata.
#
# History:
# =====
# 24.02.2015. A.J. Sims. Created.
# 29.06.2015. A.J. Sims. Creates separate episode sets, as if separate HES
# searches had been run for each cohort.
# 18.08.2015. A.J. Sims. Uses revised epimatch.
# -----

# clear workspace...
rm(list=ls())

# load functions...
source("R/epimatch.R")

```

```

# load data set...
load('data/suipop.Rdata')

# -----
# SUI cohort
# -----
cat("SUI cohort\n")
cat("-----\n")

# find all episodes with M533, M536, M521
op.codes <- quote(M533 | M536 | M521)
ep.SUI <- with(SP, {
  sapply(OPERTN, epimatch, e.codes=op.codes)
})
cat(sum(ep.SUI), "episodes containing", deparse(op.codes), "\n")

# find patients having these episodes
cohort.SUI <- unique(SP$PSEUDO_HESID[ep.SUI])
cat(length(cohort.SUI), "patients\n")

# create a subset for the SUI cohort
SUI <- subset(SP, SP$PSEUDO_HESID %in% cohort.SUI, drop=T)
cat(nrow(SUI), "episodes for these patients\n")

save(SUI, file="data/sui.Rdata")
cat("\n")

# -----
# POP cohort
# -----
cat("POP cohort\n")
cat("-----\n")

# find all episodes with POP procedures
codes <- quote(P236 | P237 | P242 | P245 | P246 | Q544 | Q545 | Q546)
ep.POP <- with(SP, {
  sapply(OPERTN, epimatch, e.codes=codes)
})
cat(sum(ep.POP), "episodes containing", deparse(codes), "\n")

# find patients having these episodes
cohort.POP <- unique(SP$PSEUDO_HESID[ep.POP])
cat(length(cohort.POP), "patients\n")

# create a subset for the SUI cohort
POP <- subset(SP, SP$PSEUDO_HESID %in% cohort.POP, drop=T)
cat(nrow(POP), "episodes for these patients\n")
save(POP, file="data/pop.Rdata")
cat("\n")

# -----
# clear
# -----
rm(list=ls())

```

## S5.2.4 activity.R

```

# -----
# activity.R
#
# Description:

```

```

# =====
# Computes raw activity to compare with HES on-line.
#
# History:
# =====
# 24.02.2015. A.J. Sims. Created.
# 29.06.2015. A.J. Sims. SUI only.
# 18.08.2015. A.J. Sims. Uses updated epimatch.
# -----

# clear workspace...
rm(list=ls())

# load functions...
source("R/epimatch.R")

# load data set...
load('data/sui.Rdata')

# -----
# Function to calculate raw activity for specified code combination
# -----
activity <- function(codes) {
  # find all episodes that include specified codes...
  activity <- with(SUI, sapply(OPERTN, FUN=epimatch, e.codes=codes))
  cat(length(which(activity)), "episodes with", deparse(codes), "\n")
  ct <- ftable(SUI$FYEAR[activity])
  fy <- unlist(attr(ct, "col.vars"))
  for (i in 1:length(ct)) {
    cat(format(ct[i], width=6, justify="right"), "in", fy[i], "\n")
  }
}

# -----
# raw data summary...
# -----
cat("Raw data\n-----\n")
cat(nrow(SUI), "episodes\n")
PATIENTS <- unique(SUI$PSEUDO_HESID)
cat(length(PATIENTS), "patients\n")

# -----
# raw activity (to match with HSCIC)
# -----
cat("\n")
cat("Activity - incontinence\n")
cat("-----\n")
activity(quote(M533))
activity(quote(M536))
activity(quote(M521))
activity(quote(M534))
activity(quote(M535))
activity(quote(M533 & (Y037 | Y264)))
activity(quote(M537))
activity(quote(M536 & (Y037 | Y264)))

```

### S5.2.5 clean.R

```

# -----
# clean.R
#

```



```

# Description:
# =====
# Cleans mesh.Rdata and saves as mesh-cleaned.Rdata
#
# History:
# =====
# 24.02.2015. A.J. Sims. Created.
# 28.04.2015. A.J. Sims. Moved to separate script.
# 30.07.2015. A.J. Sims. Uses EPI_ID instead of row.names for episode IDs.
# 18.08.2015. A.J. Sims. Uses updated epimatch.
# 11.09.2015. A.J. Sims. Clearer definition of index procedure.
# 28.09.2015. A.J. Sims. DISDATE added to index ordering to break ties.
# 07.12.2015. A.J. Sims. Added main code M528, M538, M537 as main codes which
# qualify as index procedures.
# 07.12.2015. A.J. Sims. Drop patients with records AFTER date of death.
# 08.12.2015. A.J. Sims. Drop episodes with missing FYEAR.
# 27.01.2016. A.J. Sims. OPERTN and DIAG with empty list (e.g. '-' only) are
# converted to NA.
# 14.06.2016. A.J. Sims. Codes M528 and M538 must be followed by a Y code to
# qualify as a mesh code.
# -----

rm(list=ls())
load(file="data/sui.Rdata")
source("R/epimatch.R")
source("R/opcssplit.R")
source("R/opcs_has_supp.R")
source("interventions.R")

# -----
# function to drop all episodes for specified patients
# -----
drop.patients <- function(HESIDS) {

  cat(length(HESIDS), "patients\n")

  # find all episodes for specified patients
  to.drop <- which(SUI$PSEUDO_HESID %in% HESIDS)
  cat(length(to.drop), "episodes for these patients to be dropped\n")

  # remove dropped episodes from analysis
  if (length(to.drop) > 0) {
    SUI <- SUI[-(to.drop),]
    cat(nrow(SUI), "remaining episodes\n")
    PATIENTS <- unique(SUI$PSEUDO_HESID)
    cat(length(PATIENTS), "remaining patients\n")
  }
}

# -----
# function to identify index episodes
# -----
find.index <- function() {

  # episodes with at least one tape/mesh intervention
  cat("\nFind index episodes\n-----\n")
  SUI.mt <- sapply(SUI$OPERTN, FUN=int.anymesh)
  cat(length(which(SUI.mt)), "episodes with at least 1 main tape/mesh code in OPERTN\n")

  # index episodes with at least one main code
  keep <- c('PSEUDO_HESID', 'ADMIDATE', 'DISDATE', 'EPI_ID')
  ss <- SUI[SUI.mt, keep, drop=T]
  ss <- with(ss, ss[order(ADMIDATE, DISDATE),])
}

```

```

ss <- ss[!duplicated(ss$PSEUDO_HESID),]
ndx <- ss$EPI_ID # episode IDs of index procedures
rm(ss)
rm(SUI.mt)
cat(length(ndx), "index episodes\n")
PATIENTS <- unique(SUI$PSEUDO_HESID)
cat(length(PATIENTS)-length(ndx), "patients with no index\n")

return(ndx)
}

# -----
# remove duplicated rows
# -----
cat("\n")
cat("Duplicated episodes\n")
cat("-----\n")
dup <- duplicated(SUI[,!(names(SUI) %in% c('EPI_ID'))])
#SUI <- unique(SUI)
SUI <- SUI[!dup,]
cat(sum(dup), "duplicated episodes removed\n")
cat(nrow(SUI), "episodes remaining\n")

# -----
# drop rows with missing data in essential fields...
# -----
cat("\n")
cat("Missing data (all episodes)\n")
cat("-----\n")

EXPAT <- c()
with(SUI, {

  to.drop <- c()

  drop <- which(is.na(PSEUDO_HESID))
  cat(length(drop), "episodes with missing PSEUDO_HESID\n")
  to.drop <- c(to.drop, drop)

  drop <- which(is.na(SEX))
  cat(length(drop), "episodes with missing SEX\n")
  to.drop <- c(to.drop, drop)

  drop <- which(is.na(ADMIDATE))
  cat(length(drop), "episodes with missing ADMIDATE\n")
  to.drop <- c(to.drop, drop)

  drop <- which(is.na(ADMIMETH))
  cat(length(drop), "episodes with missing ADMIMETH\n")
  to.drop <- c(to.drop, drop)

  drop <- which(is.na(PROCODE3))
  cat(length(drop), "episodes with missing PROCODE3\n")
  to.drop <- c(to.drop, drop)

  drop <- which(is.na(FYEAR))
  cat(length(drop), "episodes with missing FYEAR\n")
  to.drop <- c(to.drop, drop)

  to.drop <- unique(to.drop)
  cat(length(to.drop), "unique episodes with missing essential fields\n")

  # find all patients that have some missing essential data

```

```

EXPAT <- PSEUDO_HESID[to.drop]

  rm(drop)
  rm(to.drop)
})
drop.patients(EXPAT)
rm(EXPAT)

# -----
# inclusion criteria applying to all episodes for each patient
# -----

cat("\n")
cat("Inclusion criteria (all episodes)\n")
cat("-----\n")

EXPAT <- c()
with(SUI, {

  to.drop <- c()

  drop <- which(!(SEX==2))
  cat(length(drop), "episodes with SEX != 2\n")
  to.drop <- c(to.drop, drop)

  to.drop <- unique(to.drop)
  cat(length(to.drop), "unique episodes not matching inclusion criteria\n")

  # find all patients involved
  EXPAT <- PSEUDO_HESID[to.drop]

  rm(drop)
  rm(to.drop)

})
drop.patients(EXPAT)
rm(EXPAT)

# -----
# missing data in index episodes
# -----
ndx <- find.index()
cat("\n")

cat("Missing data (index episodes)\n")
cat("-----\n")

EXPAT <- c()
with(SUI[SUI$EPI_ID %in% ndx,], {

  to.drop <- c()

  drop <- which(is.na(STARTAGE))
  cat(length(drop), "index episodes with missing STARTAGE\n")
  to.drop <- c(to.drop, drop)

  to.drop <- unique(to.drop)
  cat(length(to.drop), "unique index episodes with missing essential data\n")

  # all patients with missing fields in index episode
  EXPAT <- PSEUDO_HESID[to.drop]

})

```

```

drop.patients(EXPAT)
rm(EXPAT)

# -----
# inclusion criteria for index episodes
# -----

ndx <- find.index()
cat("\n")
cat("Inclusion criteria (index episodes)\n")
cat("-----\n")

EXPAT <- c()
with(SUI[SUI$EPI_ID %in% ndx,], {

  to.drop <- c()

  drop <- which(STARTAGE < 18)
  cat(length(drop), "index episodes with STARTAGE < 18\n")
  to.drop <- c(to.drop, drop)

  adm.inc <- c('11', '12', '13', '21', '22', '23', '24', '25', '2A', '2B', '2D', '28', '81')
  drop <- which(!(ADMIMETH %in% adm.inc))
  cat(length(drop), "index episodes with disallowed ADMIMETH\n")
  to.drop <- c(to.drop, drop)

  to.drop <- unique(to.drop)
  cat(length(to.drop), "unique index episodes not matching inclusion criteria\n")

  # all patients with invalid fields in index episode
  EXPAT <<- PSEUDO_HESID[to.drop]

})
drop.patients(EXPAT)
rm(EXPAT)

# -----
# exclude patients with episodes after they have been marked as died in hospital
# -----

cat("\n")
cat("Patients with episodes AFTER date of death\n")
cat("-----\n")

# episodes
event.death <- SUI$DISMETH==4
deaths <- SUI[event.death, c("PSEUDO_HESID", "SPELL", "ADMIDATE", "DISDATE")]
cat(nrow(deaths), "in-hospital death episodes\n")

# spells
deaths <- deaths[order(deaths$PSEUDO_HESID, deaths$ADMIDATE, deaths$SPELL),]
dup <- duplicated(deaths$PSEUDO_HESID)
deaths <- deaths[!dup,]
cat(nrow(deaths), "in-hospital death spells\n")

# find any patients with records AFTER date of death
revivs <- apply(deaths, 1, FUN=function(row) {
  person <- row['PSEUDO_HESID']
  dod <- row['DISDATE']
  ss <- (SUI$PSEUDO_HESID==person & SUI$ADMIDATE>dod)
  return(sum(ss)>0)
})
cat(sum(revivs, na.rm=T), "patients with episodes AFTER date of death\n")
print(deaths[revivs, c("SPELL", "ADMIDATE", "DISDATE")], row.names=F)

```

```

drop.patients(deaths$PSEUDO_HESID[revivs])

# -----
# final identification of index procedures
# -----
ndx <- find.index()
cat("\n")

# -----
# add index field
# -----
SUI$Index <- F
SUI[SUI$EPI_ID %in% ndx, 'Index'] <- T

# -----
# remove non-OPCS codes from OPERTN
# -----
cat("Bad OPCS and ICD-10 codes\n")
cat("-----\n")

"%w/o%" <- function(x, y) x[!x %in% y] #-- x without y
SUI$OPERTN <- sapply(SUI$OPERTN, function(codes) {
  # eliminate non-OPCS codes
  opcodes <- codes %w/o% c("&", "-", "- ", "& ")
  if (length(opcodes)==0) {
    return(NA)
  } else {
    return(opcodes)
  }
})
pattern <- "^[:upper:][:digit:]{2}[X[:digit:]]{1}$" # e.g. A001, P232, I10X
all.OPERTN <- unlist(SUI$OPERTN)
all.OPERTN <- all.OPERTN[!is.na(all.OPERTN)]
bad.OPERTN <- grep(pattern, all.OPERTN, invert=T)
cat(length(bad.OPERTN), "bad OPERTN codes out of", length(SUI$OPERTN), "episodes\n")
ct <- as.data.frame(table(all.OPERTN[bad.OPERTN]))
if (nrow(ct)>0) {
  names(ct) <- c('code', 'freq')
  print(ct, row.names=F)
}

# -----
# remove non-ICD-10 codes from DIAG
# -----
SUI$DIAG <- sapply(SUI$DIAG, function(codes) {
  # eliminate non-ICD-10 codes
  opcodes <- codes %w/o% c("&", "-", "- ", "& ")
  if (length(opcodes)==0) {
    return(NA)
  } else {
    return(opcodes)
  }
})
all.DIAG <- unlist(SUI$DIAG)
all.DIAG <- all.DIAG[!is.na(all.DIAG)]
bad.DIAG <- grep(pattern, all.DIAG, invert=T)
cat(length(bad.DIAG), "bad DIAG codes out of", length(SUI$DIAG), "episodes\n")
ct <- as.data.frame(table(all.DIAG[bad.DIAG]))
if (nrow(ct)>0) {
  names(ct) <- c('code', 'freq')
  print(ct, row.names=F)
}
cat("\n")

```

```

# -----
# save cleaned data set
# -----
save(SUI, file="data/sui-cleaned.Rdata")
rm(list=ls())

```

## S5.2.6 indexprocs.R

```

# -----
# indexprocs.R
#
# Description:
# =====
# Identifies index procedures and collects further details about them.
#
# History:
# =====
# 14.12.2015. A.J. Sims. Created from parts of pericomp.R.
# 23.12.2015. A.J. Sims. Repair and removal codes added to white list (because
#                 they count as index procedures, which are excluded
#                 later). Also added POP codes to white list, for which
#                 same argument applies.
# 10.05.2016. A.J. Sims. Step to identify complications in index procedures
#                 moved before splitting cohort.
# 14.06.2016. A.J. Sims. Use functions in interventions.R.
# 21.06.2016. A.J. Sims. LoS set to NA for DISDATE < ADMIDATE; but whole
#                 spell not excluded.
# 22.02.2017. A.J. Sims. Edits to activity graph for clarity.
# -----

rm(list=ls())
source("R/epimatch.R")
source("R/inChapters.R")
source("R/inSections.R")
source("R/opcssplit.R")
source("R/opcs_has_supp.R")
source("R/icdsplit.R")
source("R/is_complication.R")
source("pubfig.R")
source("interventions.R")

load("data/sui-cleaned.Rdata")

# -----
# Build dataframe of episodes in index spells
# -----
cat("SUI index spells\n-----\n")
IEP.SUI <- merge(data.frame(SPELL=SUI$SPELL[SUI$Index==T]), SUI, by="SPELL", sort=T)

cat(nrow(IEP.SUI), "episodes in index spells\n")
cat(sum(IEP.SUI$Index==T), "index episodes\n")
cat(sum(IEP.SUI$Index==F), "non-index episodes\n")

rm(SUI)

# -----
# collect information about index spells
# -----

cat("\n")
cat("Information about index spells\n")

```

```

cat("-----\n")

# count of episodes per spell
SP.SUI <- with(IEP.SUI, {aggregate(EPI_ID, by=list(SPELL), FUN=length)})
names(SP.SUI) <- c("SPELL", "Count")

# diagnostic print
cat(nrow(SP.SUI), "index spells\n")
cat(sum(SP.SUI$Count>1), "index spells with >1 episode\n")

# require diagnosis of SUI in index spell
sui.codes <- quote(N393 | N394 | R32X | T831 | T834 | T835 | T836 | T838 | T839 | Z466 )
IEP.SUI$isSUI <- sapply(IEP.SUI$DIAG, FUN=epimatch, e.codes=sui.codes)
df <- with(IEP.SUI, {aggregate(isSUI, by=list(SPELL), FUN=any)})
names(df) <- c("SPELL", "isSUI")
SP.SUI <- merge(SP.SUI, df, by="SPELL", sort=T)
rm(df)
IEP.isSUI <- NULL
cat(sum(SP.SUI$isSUI), "index spells with SUI diagnosis\n")
cat(sum(SP.SUI$isSUI==F), "index spells without SUI diagnosis\n")
SP.SUI <- SP.SUI[SP.SUI$isSUI==T, , drop=T]

# add extra columns to spell frame
keep <- c("SPELL", "PSEUDO_HESID", "PROCEDURE3", "STARTAGE", "ADMIMETH", "ADMIDATE",
         "DISMETH", "DISDATE", "FYEAR")
demog.df <- IEP.SUI[,keep]
dup <- which(duplicated(demog.df[,c("SPELL", "PROCEDURE3", "ADMIMETH")]))
if (length(dup)>0) {
  demog.df <- demog.df[-dup,]
}
cat(nrow(demog.df), "index spells with demographic details found\n")
SP.SUI <- merge(SP.SUI, demog.df, by="SPELL", sort=T)
rm(demog.df)

SP.SUI$LoS <- SP.SUI$DISDATE - SP.SUI$ADMIDATE
cat(sum(SP.SUI$LoS<0, na.rm=T), "spells with LoS < 0 days; LoS set to NA\n")
SP.SUI$LoS[SP.SUI$LoS < 0] <- NA

cat(nrow(SP.SUI), "spells with SUI diagnosis and demographic details\n")

# -----
# classify index spells by type of mesh operation
# -----

cat("\n")
cat("Classify index spells by type of mesh operation\n")
cat("-----\n")

# removals
IEP.SUI$removal <- sapply(IEP.SUI$OPERTN, FUN=int.removal)
cat(sum(IEP.SUI$removal), "index episodes with removal of mesh\n")

# repairs
IEP.SUI$repair <- sapply(IEP.SUI$OPERTN, FUN=int.repair)
cat(sum(IEP.SUI$repair), "index episodes with repair of mesh\n")

# renewals
IEP.SUI$renewal <- sapply(IEP.SUI$OPERTN, FUN=int.renewal)
cat(sum(IEP.SUI$renewal), "index episodes with renewal of mesh\n")

# POP operations (by main code)
IEP.SUI$pop <- sapply(IEP.SUI$OPERTN, FUN=int.pop)

```

```

cat(sum(IEP.SUI$pop), "index episodes involving POP surgery\n")

# combine all these exclusions
IEP.SUI$rrrrp <- with(IEP.SUI, removal | repair | renewal | pop)
cat(sum(IEP.SUI$rrrrp), "index episodes with mesh removal/repair/renewal or pop surgery\n")

# exclude spells with r/r/r or pop (which are not index spells)
df <- with(IEP.SUI, {aggregate(rrrrp, by=list(SPELL), FUN=any)})
names(df) <- c("SPELL", "rrrrp")
SP.SUI <- merge(SP.SUI, df, by="SPELL", sort=T)
rm(df)
IEP.SUI$rrrrp <- NULL
cat(sum(SP.SUI$rrrrp), "'index' spells with repair/removal/renewal or POP surgery - excluded\n")
SP.SUI <- SP.SUI[SP.SUI$rrrrp==F, , drop=T]
cat(nrow(SP.SUI), 'remaining index spells (')
cat(length(unique(SP.SUI$PSEUDO_HESID)), "patients)\n")
cat("\n")

# tot, tvt and minisling codes
tot.codes <- quote(M536)
IEP.SUI$TOT <- sapply(IEP.SUI$OPERTN, FUN=epimatch, e.codes=tot.codes)
cat(sum(IEP.SUI$TOT), "index episodes including TOT main code\n")

tvt.codes <- quote(M533)
IEP.SUI$TVT <- sapply(IEP.SUI$OPERTN, FUN=epimatch, e.codes=tvt.codes)
cat(sum(IEP.SUI$TVT), "index episodes including TVT main code\n")

ms.codes <- quote(M521)
IEP.SUI$MS <- sapply(IEP.SUI$OPERTN, FUN=epimatch, e.codes=ms.codes)
cat(sum(IEP.SUI$MS), "index episodes including MS main code\n")

# combine into spells (for eligible spells only)
cat("Check for combinations of TVT, TOT, MS:\n")
df <- aggregate(IEP.SUI[,c('TOT', 'TVT', 'MS')], by=list(IEP.SUI$SPELL), FUN=any)
names(df) <- c('SPELL', 'TOT', 'TVT', 'MS')
df$comb <- df$TOT + df$TVT + df$MS
SP.SUI <- merge(SP.SUI, df, by="SPELL", sort=T)
rm(df)
cat(' ', sum(SP.SUI$comb==0), "spells with no TVT, TOT or MS\n")
cat(' ', sum(SP.SUI$comb==1), "spells with one of TVT, TOT or MS\n")
cat(' ', sum(SP.SUI$comb>1), "spells with more than one TVT, TOT or MS\n")
SP.SUI$comb <- SP.SUI$comb>1
SP.SUI$TVT[SP.SUI$comb==T] <- F
SP.SUI$TOT[SP.SUI$comb==T] <- F
SP.SUI$MS[SP.SUI$comb==T] <- F

# anything else
combos <- IEP.SUI[IEP.SUI$SPELL %in% SP.SUI$SPELL[SP.SUI$comb==T],]
save(combos, file="data/combos.Rdata")
cat(' ', nrow(SP.SUI[SP.SUI$TOT==T & SP.SUI$comb==F,]), "index spells with TOT only\n")
cat(' ', nrow(SP.SUI[SP.SUI$TVT==T & SP.SUI$comb==F,]), "index spells with TVT only\n")
cat(' ', nrow(SP.SUI[SP.SUI$MS==T & SP.SUI$comb==F,]), "index spells with MS only\n")
cat(' ', nrow(SP.SUI[SP.SUI$comb==T,]), "index spells with combination\n")

# mark episodes in eligible spells
IEP.SUI$eligible <- IEP.SUI$SPELL %in% SP.SUI$SPELL
cat("\n")
cat(sum(IEP.SUI$eligible), "episodes in eligible spells marked\n")

# -----
# identify spells with complication
# -----

```



```

cat("\n")
cat("Identify spells with complication\n")
cat("-----\n")

# data frame to store which code identified a chunk as a complication
# (so will have one entry per qualifying chunk). Also stores spell
# ID with which the chunk is associated, so can be referenced to
# type of tape introduction
which.comp <- data.frame(SPELL=NA, PSEUDO_HESID=NA, MainCode=NA, CompCode=NA, SuppCode=NA)

# identify complications from diagnostic codes, one episode per row
is.comp <- function(row) {
  chunks <- icdsplit(unlist(row['DIAG'], use.names=F)) # break into sequences
  chunks <- chunks[-1] # ignore the first
  if (length(chunks) == 0) {
    return(F)
  }
  chunk.MT <- sapply(chunks, FUN=is.complication) # main and trigger codes, if any
  chunk.MT <- as.data.frame(t(chunk.MT)) # in columns
  chunk.MT <- chunk.MT[!is.na(chunk.MT$MainCode) | !is.na(chunk.MT$CompCode),]
  if (nrow(chunk.MT)>0) {
    chunk.MT <- cbind(SPELL=row['SPELL'], PSEUDO_HESID=row['PSEUDO_HESID'], chunk.MT)
    which.comp <-< rbind(which.comp, chunk.MT)
  }
  return(nrow(chunk.MT)>0)
}

# find spells with complication
keep <- c('PSEUDO_HESID', 'SPELL', 'EPI_ID', 'OPERTN', 'DIAG')
ss <- IEP.SUI[IEP.SUI$SPELL %in% SP.SUI$SPELL, keep]
cat(nrow(ss), 'index episodes in eligible spells\n')
ss$hasComplication <- apply(ss, 1, FUN=is.comp)
cat(sum(ss$hasComplication), "index episodes in eligible spells with complication\n")
bad.spells <- unique(ss$SPELL[ss$hasComplication])
cat(length(bad.spells), 'eligible index spells with complication\n')

df <- with(ss, {aggregate(hasComplication, by=list(SPELL), FUN=any)})
names(df) <- c("SPELL", "hasComplication")
SP.SUI <- merge(SP.SUI, df, by="SPELL", all.x=T, sort=T)
rm(df)

# tidy up which.comp
narrow <- apply(which.comp, 1, function(x) all(is.na(x)))
which.comp <- which.comp[!narrow, ]

# function to write codes in normalised order (i.e. one code per row)
normalise.codes <- function(chunk) {
  return(c(MainCode=chunk[1], SuppCode=paste(chunk[-1], collapse=' ')))
}

# collate procedures and diagnoses in spells with complication for
# further analysis
normalise <- function(row) {
  chunks <- opcssplit(unlist(row['OPERTN'], use.names=F))
  ops <- sapply(X=chunks, FUN=normalise.codes)
  ops <- as.data.frame(t(ops), optional=T)
  ops <- cbind(SPELL=unlist(row['SPELL']), EPI_ID=unlist(row['EPI_ID']),
              OorD='OPCS4', ops, row.names=NULL)
  chunks <- icdsplit(unlist(row['DIAG'], use.names=F))
  dgs <- sapply(X=chunks, FUN=normalise.codes)
  dgs <- as.data.frame(t(dgs), optional=T)
  dgs <- cbind(SPELL=unlist(row['SPELL']), EPI_ID=unlist(row['EPI_ID']),
              OorD='ICD10', dgs, row.names=NULL)
}

```

```

    return(rbind(ops, dgs))
  }

  # write index procedures with complication in normalised order
  spells.comp <- apply(ss[ss$SPELL %in% bad.spells,], 1, FUN=normalise)
  spells.comp <- as.data.frame(do.call(rbind, spells.comp))
  spells.comp$OorD <- as.factor(spells.comp$OorD)
  spells.comp$MainCode <- as.character(spells.comp$MainCode)
  spells.comp$SuppCode <- as.character(spells.comp$SuppCode)
  spells.comp <- spells.comp[order(spells.comp$SPELL, spells.comp$EPI_ID),]

  cat("spells with complication written in code normalised order to spells.comp:\n")
  cat('  ', nrow(spells.comp), "code chunks\n")
  cat('  ', length(unique(spells.comp$SPELL)), "unique spells\n")
  cat('  ', length(unique(spells.comp$EPI_ID)), "unique episodes\n")

  rm(ss)

  # -----
  # Look for 'late' (other) operation codes, suggesting that
  # procedures may have been done as rescue
  # -----
  cat("\n")
  cat("Index spells with 'late' operations\n")
  cat("-----\n")

  # look for presence of late codes in index spells
  late.codes <- quote(Y712 | Y713 | Y716 | Y717)
  IEP.SUI$isLate <- sapply(IEP.SUI$OPERTN, FUN=epimatch, e.codes=late.codes)
  df <- with(IEP.SUI, {aggregate(isLate, by=list(SPELL), FUN=any)})
  names(df) <- c("SPELL", "isLate")
  SP.SUI <- merge(SP.SUI, df, by="SPELL", sort=T)
  rm(df)
  IEP.SUI$isLate <- NULL
  cat(sum(SP.SUI$isLate), "index spells with late operation code (Y712, Y713, Y716, Y717)\n")

  # -----
  # draw activity graph
  # -----

  cat("\n")
  cat("Generating activity graph\n")
  cat("-----\n")
  keep <- c("TOT", "TVT", "MS")
  FYFreq <- aggregate(SP.SUI[,keep], by=list(SP.SUI$FYEAR), FUN=sum)

  pubfig("activity")
  gp <- par(no.readonly=T)
  layout(matrix(c(1,2), 2, 1, byrow=T), heights=c(1.5,1))

  par(mar=c(0,4,4,2))
  x <- c(1.5,2.5,3.5,4.5,5.5,6.5,7.5,8.5)
  plot(x, FYFreq$TOT, type="b", pch=17,
       xaxt="n",
       xlab="",
       ylab="No. of procedures (TVT/TOT)",
       ylim = c(0,8500),
       cex.axis=0.7,
       cex.lab=1.0,
       las=1)
  points(x, FYFreq$TVT, pch=16, type='b')

  par(mar=c(5,4,0,2))

```

```

plot(x,FYFreq$MS, type="b", pch=3, xaxt="n", xlab="Financial Year",
     ylab="No. of procedures (SS)",
     ylim=c(0,225), cex.lab=1.0, cex.axis=0.7, las=1)
xlabels = c("2007/08","2008/09","2009/10","2010/11","2011/12","2012/13","2013/14", "2014/15")
axis(side=1, at=x, labels=xlabels, las=1, cex.axis=0.7)

par(gp)
dev.off()
cat("Activity graph written to activity.[pdf|eps]")
cat("\n")

# -----
# additional information about index spells
# -----

cat("\n")
cat("Index spells with cystoscopy\n")
cat("-----\n")

# Number with endoscopic examination of bladder/urethra
bladder.codes <- quote(M45X|M450|M451|M452|M453|M454|M455|M456|M457|M458|M459)
urethra.codes <- quote(M77X|M770|M771|M772|M773|M774|M775|M776|M777|M778|M779)

IEP.SUI$M45 <- sapply(IEP.SUI$OPERTN, FUN=epimatch, e.codes=bladder.codes)
df <- with(IEP.SUI, {aggregate(M45, by=list(SPELL), FUN=any)})
names(df) <- c("SPELL", "M45")
SP.SUI <- merge(SP.SUI, df, by="SPELL", sort=T)
rm(df)
IEP.SUI$M45 <- NULL
cat(sum(SP.SUI$M45), "index spells with endoscopy of bladder\n")

IEP.SUI$M77 <- sapply(IEP.SUI$OPERTN, FUN=epimatch, e.codes=urethra.codes)
df <- with(IEP.SUI, {aggregate(M77, by=list(SPELL), FUN=any)})
names(df) <- c("SPELL", "M77")
SP.SUI <- merge(SP.SUI, df, by="SPELL", sort=T)
rm(df)
IEP.SUI$M77 <- NULL
cat(sum(SP.SUI$M77), "index spells with endoscopy of urethra\n")

# either
SP.SUI$M45M77 <- SP.SUI$M45 | SP.SUI$M77
cat(sum(SP.SUI$M45M77), "index spells with endoscopy of either bladder or urethra\n")

# catheterisations
cath.codes <- quote(M302 | M382 | M471 | M474 | M478 | M479 | M481)
IEP.SUI$cath <- sapply(IEP.SUI$OPERTN, FUN=epimatch, e.codes=cath.codes)
df <- with(IEP.SUI, {aggregate(cath, by=list(SPELL), FUN=any)})
names(df) <- c("SPELL", "cath")
SP.SUI <- merge(SP.SUI, df, by="SPELL", sort=T)
rm(df)
IEP.SUI$cath <- NULL
cat(sum(SP.SUI$cath), "index spells with catheterization\n")

# -----
# save spell details
# -----
save(SP.SUI, IEP.SUI, which.comp, spells.comp, file="data/indexprocs.Rdata")
rm(list=ls())

```

## S5.2.7 split.R

```

# -----
# split.R
#
# Description:
# =====
# Splits cohort into confounded and unconfounded.
#
# History:
# =====
# 12.05.2016. A.J. Sims. Created.
# 19.05.2016. AJS/KK. Added rescue procedures to whitelist for spells with
# a complication.
# 20.05.2016. AJS/KK. Updated whitelist.
# -----

rm(list=ls())
source("R/inChapters.R")
source("R/inSections.R")
source("R/opcssplit.R")
source("R/opcs_has_supp.R")
source("R/icdsplit.R")

load("data/indexprocs.Rdata")

# -----
# confounding operations
# -----

cat("\n")
cat("Split cohort by presence of confounding procedure\n")
cat("-----\n")

# 'white-list' chapters
wlChapters <- c("U")

# 'white-list' sections
wlSections <- c("L72", "L95",
               "M11", "M30", "M45", "M77", "M85",
               "Q18", "Q39", "Q50",
               "A55",
               "Q55",
               "E85", "E86", "E87", "E88", "E89", "E90", "E91",
               "E92", "E93", "E94", "E95", "E96", "E97", "E98",
               "A52",
               "Y02", "Y21", "Y22", "Y25", "Y31", "Y32", "Y41", "Y50",
               "Y52", "Y53", "Y70", "Y75", "Y76", "Y80", "Y81", "Y82",
               "Y83", "Y84", "Y85", "Y86", "Y87", "Y88", "Y89", "Y90",
               "Y91", "Y92", "Y93", "Y94", "Y97", "Y98", "Y99",
               "Z31", "Z41", "Z42", "Z44", "Z53",
               "M47")

# 'white-list' codes
wlCodes <- c("A843",
            "H444",
            "M496",
            "P273",
            "M832",
            "P278",
            "S578",
            "T317",
            "O161",
            "L912", "L914", "L997",
            "M492", "M493",
            "S421", "S422", "S423", "S428", "S429",

```

```

        "S476",
        "S574", "S575", "S576", "S577",
        "X292", "X308", "X309", "X312", "X569"
    )

# SUI codes
suiCodes <- c("M521", "M533", "M536")

# 'rescue' procedures
rescueCodes <- c(
  'E423',      #Temporary tracheostomy
  'E427',      #Removal of tracheostomy tube
  'L703',      #Ligation of artery NEC
  'M373',      #Repair of rupture of bladder
  'M378',      #Other specified other repair of bladder
  'M379',      #Unspecified other repair of bladder
  'M392',      #Open removal of foreign body from bladder
  'M422',      #Endoscopic cauterisation of lesion of bladder
  'M443',      #Endoscopic removal of foreign body from bladder
  'M444',      #Endoscopic removal of blood clot from bladder
  'M737',      #Repair of rupture of urethra NEC
  'M738',      #Other specified repair of urethra
  'M739',      #Unspecified repair of urethra
  'P203',      #Cauterisation of lesion of vagina
  'P271',      #Evacuation of haematoma from vagina
  'P294',      #Removal of foreign body from vagina
  'S111',      #Cauterisation of lesion of skin NEC
  'S424',      #Resuture of skin NEC
  'S571',      #Debridement of skin NEC
  'T301',      #Reopening of abdomen and re-exploration of intra-abdominal operation site and
                #surgical arrest of postoperative bleeding
  'T302',      #Reopening of abdomen and re-exploration of intra-abdominal operation site NEC
  'T303',      #Reopening of abdomen NEC
  'T304',      #Opening of abdomen and exploration of groin
  'T308',      #Other specified opening of abdomen
  'T309',      #Unspecified opening of abdomen
  'X332',      #Intravenous blood transfusion of packed cells
  'X339',      #Unspecified other blood transfusion
  'X341',      #Transfusion of coagulation factor
  'X342',      #Transfusion of plasma NEC
  'X403',      #Haemodialysis NEC
  'X404',      #Haemofiltration
  'X501',      #Direct current cardioversion
  'X502',      #External cardioversion NEC
  'X503',      #Advanced cardiac pulmonary resuscitation
  'X509',      #Unspecified external resuscitation
  'X355'      #Intravenous injection of antimicrobial therapy'
)

# Function to apply whitelists for confounding operations
confounding.ops <- function(codes, allow.rescue=F) {

  # an empty character vector (if no confounding ops)
  no.ops <- character(0)

  # to start, all codes might confound
  confcodes <- codes
  if (length(confcodes)==0) return(no.ops)

  # remove NA codes
  mat <- (confcodes %in% c(NA))
  confcodes <- confcodes[which(mat==F)]
  if (length(confcodes)==0) return(no.ops)
}

```

```

# remove any sui codes
mat <- (confcodes %in% suiCodes)
confcodes <- confcodes[which(mat==F)]
if (length(confcodes)==0) return(no.ops)

# remove rescue codes, if they are allowed
if (allow.rescue) {
  mat <- (confcodes %in% rescueCodes)
  confcodes <- confcodes[which(mat==F)]
  if (length(confcodes)==0) return(no.ops)
}

# are any codes in white list chapters?
mat <- (confcodes %in% Chapters% wlChapters)
confcodes <- confcodes[which(mat==F)]
if (length(confcodes)==0) return(no.ops)

# are any codes in white list sections?
mat <- (confcodes %in% Sections% wlSections)
confcodes <- confcodes[which(mat==F)]
if (length(confcodes)==0) return(no.ops)

# are any codes in white list codes?
mat <- (confcodes %in% wlCodes)
confcodes <- confcodes[which(mat==F)]
if (length(confcodes)==0) return(no.ops)

return(confcodes)
}

# apply function to eligible spells (ignoring rescue procedures)
IEP.SUI$confound.no rescue <- sapply(IEP.SUI$OPERTN, confounding.ops)
IEP.SUI$confound.no rescue.n <- sapply(IEP.SUI$confound.no rescue, FUN=length)

# apply to eligible spells accounting for rescue procedures
IEP.SUI$confound.rescue <- sapply(IEP.SUI$OPERTN, confounding.ops, allow.rescue=T)
IEP.SUI$confound.rescue.n <- sapply(IEP.SUI$confound.rescue, FUN=length)

# mark whether episode is in a bad spell (one with a complication)
IEP.SUI$inBadSpell <- IEP.SUI$SPELL %in% SP.SUI$SPELL[SP.SUI$hasComplication]
cat(sum(IEP.SUI$inBadSpell), 'episodes in bad spells\n')

# apply confounding logic
keep <- c('confound.no rescue.n', 'confound.rescue.n', 'inBadSpell')
IEP.SUI$isConfounded <- apply(IEP.SUI[,keep], 1, FUN=function(row) {
  is.conf <- F
  if (!row['inBadSpell']) {
    is.conf <- (row['confound.no rescue.n'] > 0)
  }
  else {
    is.conf <- (row['confound.rescue.n'] > 0)
  }
  return(is.conf)
})

# identify spells with confounding operations (in any episode)
df <- with(IEP.SUI, {aggregate(isConfounded, by=list(SPELL), FUN=any)})
names(df) <- c("SPELL", "isConfounded")
SP.SUI <- merge(SP.SUI, df, by="SPELL", sort=T)
rm(df)
cat(nrow(SP.SUI), "eligible index spells\n")
cat(' ', sum(!SP.SUI$isConfounded), "index spells without confounding operation\n")

```

```

cat(' ', sum(SP.SUI$isConfounded), "index spells with confounding operation\n")
cat("\n")

# treat combinations as confounded
cat("Unconfounded spells with combination treated as confounded\n")
SP.SUI$isConfounded <- SP.SUI$isConfounded==T | SP.SUI$comb==T
cat(' ', sum(!SP.SUI$isConfounded), "index spells without confounding operation\n")
cat(' ', sum(SP.SUI$isConfounded), "index spells with confounding operation\n")
cat("\n")

# summary of episodes
cat(sum(IEP.SUI$isConfounded & IEP.SUI$eligible), "eligible index spell episodes",
    "with confounding operation\n")
cat(sum(!IEP.SUI$isConfounded & IEP.SUI$eligible), "eligible index spell episodes",
    "without confounding operation\n")
cat('\n')

# tabulate the list of confounding operations
allconf.4 <- unlist(IEP.SUI$confound.norescue)
allconf.3 <- substr(allconf.4, 1, 3)
df <- as.data.frame(table(allconf.3))
names(df) <- c("OPCS section", "Frequency")
cat("Confounding procedures in index spells (by OPCS-4 section)\n")
cat("-----\n")
cat("(Potential rescue procedures included in this list)\n")
print(df, row.names=F)
cat("\n")

allconf.1 <- substr(allconf.4, 1, 1)
df <- as.data.frame(table(allconf.1))
names(df) <- c("OPCS chapter", "Frequency")
cat("Confounding procedures in index spells (by OPCS-4 chapter)\n")
cat("-----\n")
cat("(Potential rescue procedures included in this list)\n")
print(df, row.names=F)
cat("\n")

cat("\n")
cat("Summary of split cohorts\n")
cat("-----\n")

# summary
cat(sum(SP.SUI$TOT), "index spells with TOT introduction only\n")
cat(' ', sum(SP.SUI$TOT & !SP.SUI$isConfounded),
    "unconfounded index spells with TOT introduction only\n")
cat(' ', sum(SP.SUI$TOT & SP.SUI$isConfounded),
    "confounded index spells with TOT introduction only\n")

cat(sum(SP.SUI$TVT), "index spells with TVT introduction only\n")
cat(' ', sum(SP.SUI$TVT & !SP.SUI$isConfounded),
    "unconfounded index spells with TVT introduction only\n")
cat(' ', sum(SP.SUI$TVT & SP.SUI$isConfounded),
    "confounded index spells with TVT introduction only\n")

cat(sum(SP.SUI$MS), "index spells with minisling introduction only\n")
cat(' ', sum(SP.SUI$MS & !SP.SUI$isConfounded),
    "unconfounded index spells with minisling introduction only\n")
cat(' ', sum(SP.SUI$MS & SP.SUI$isConfounded),
    "confounded index spells with minisling introduction only\n")

cat(sum(SP.SUI$comb), "index spells with combination (or none)\n")

```

```

cat(' ', sum(SP.SUI$comb & !SP.SUI$isConfounded),
     "unconfounded index spells with combination (or none)\n")
cat(' ', sum(SP.SUI$comb & SP.SUI$isConfounded),
     "confounded index spells with combination (or none)\n")

# -----
# characteristics of confounded and unconfounded cohorts
# -----

cat("\n")
cat("Unconfounded cohort characteristics\n")
cat("-----\n")
ss <- subset(SP.SUI, (!SP.SUI$isConfounded))
cat(nrow(ss), "all patients\n")
q <- quantile(ss$STARTAGE, probs=c(0.25, 0.5, 0.75))
cat(" ", q[2], "(", q[1], "to", q[3],") median (IQR) age, years\n")
cat(" ", length(unique(ss$PROCEDURE3)), "different providers\n")
cat(" ", sum(ss$ADMIMETH %in% c('11', '12', '13', '81')), "elective admissions\n")
q <- quantile(ss$LoS, probs=c(0.25, 0.5, 0.75), na.rm=T)
cat(" ", q[2], "(", q[1], "to", q[3],") median (IQR) LoS, days\n")
los2 <- length(which(ss$LoS>1))
cat(' ', los2, "/", length(ss$LoS),
     "(", round(100.0*los2/length(ss$LoS), 2), "%) staying longer than 1 night\n")
cat("  LoS distribution:")
ct <- as.data.frame(table(ss$LoS))
ct <- cbind(rep(c(' '), nrow(ct)), ct)
names(ct) <- c(' ', 'LoS', 'freq')
print(ct, row.names=F)

ss <- subset(SP.SUI, (!SP.SUI$comb & !SP.SUI$isConfounded))
cat(nrow(ss), "patients with one of TVT, TOT or MS\n")
q <- quantile(ss$STARTAGE, probs=c(0.25, 0.5, 0.75))
cat(" ", q[2], "(", q[1], "to", q[3],") median (IQR) age, years\n")
cat(" ", length(unique(ss$PROCEDURE3)), "different providers\n")
cat(" ", sum(ss$ADMIMETH %in% c('11', '12', '13', '81')), "elective admissions\n")
q <- quantile(ss$LoS, probs=c(0.25, 0.5, 0.75), na.rm=T)
cat(" ", q[2], "(", q[1], "to", q[3],") median (IQR) LoS, days\n")
los2 <- length(which(ss$LoS>1))
cat(' ', los2, "/", length(ss$LoS),
     "(", round(100.0*los2/length(ss$LoS), 2), "%) staying longer than 1 night\n")
cat("  LoS distribution:")
ct <- as.data.frame(table(ss$LoS))
ct <- cbind(rep(c(' '), nrow(ct)), ct)
names(ct) <- c(' ', 'LoS', 'freq')
print(ct, row.names=F)

ss <- subset(SP.SUI, (SP.SUI$TOT & !SP.SUI$isConfounded))
cat(nrow(ss), "patients with TOT only\n")
q <- quantile(ss$STARTAGE, probs=c(0.25, 0.5, 0.75))
cat(" ", q[2], "(", q[1], "to", q[3],") median (IQR) age, years\n")
cat(" ", length(unique(ss$PROCEDURE3)), "different providers\n")
cat(" ", sum(ss$ADMIMETH %in% c('11', '12', '13', '81')), "elective admissions\n")
q <- quantile(ss$LoS, probs=c(0.25, 0.5, 0.75), na.rm=T)
cat(" ", q[2], "(", q[1], "to", q[3],") median (IQR) LoS, days\n")
cat(" ", sum(ss$DISMETH %in% c('4')), "in-hospital deaths\n")
cat(" ", sum(ss$M45), "admissions with endoscopic examination of bladder (M45)\n")
cat(" ", sum(ss$M77), "admissions with endoscopic examination of urethra (M77)\n")
cat(" ", sum(ss$M45M77), "admissions with endoscopic examination of urethra or bladder\n")
cat(" ", sum(ss$cath), "admissions with catheterization\n")

ss <- subset(SP.SUI, (SP.SUI$TVT & !SP.SUI$isConfounded))
cat(nrow(ss), "patients with TVT only\n")
q <- quantile(ss$STARTAGE, probs=c(0.25, 0.5, 0.75))

```



```

cat(" ", q[2], "(", q[1], "to", q[3],") median (IQR) age, years\n")
cat(" ", length(unique(ss$PROCEDURE3)), "different providers\n")
cat(" ", sum(ss$ADMIMETH %in% c('11', '12', '13', '81')), "elective admissions\n")
q <- quantile(ss$LoS, probs=c(0.25, 0.5, 0.75),na.rm=T)
cat(" ", q[2], "(", q[1], "to", q[3],") median (IQR) LoS, days\n")
cat(" ", sum(ss$DISMETH %in% c('4')), "in-hospital deaths\n")
cat(" ", sum(ss$M45), "admissions with endoscopic examination of bladder (M45)\n")
cat(" ", sum(ss$M77), "admissions with endoscopic examination of urethra (M77)\n")
cat(" ", sum(ss$M45M77), "admissions with endoscopic examination of urethra or bladder\n")
cat(" ", sum(ss$cath), "admissions with catheterization\n")

ss <- subset(SP.SUI, (SP.SUI$MS & !SP.SUI$isConfounded))
cat(nrow(ss), "patients with minisling only\n")
q <- quantile(ss$STARTAGE, probs=c(0.25, 0.5, 0.75))
cat(" ", q[2], "(", q[1], "to", q[3],") median (IQR) age, years\n")
cat(" ", length(unique(ss$PROCEDURE3)), "different providers\n")
cat(" ", sum(ss$ADMIMETH %in% c('11', '12', '13', '81')), "elective admissions\n")
q <- quantile(ss$LoS, probs=c(0.25, 0.5, 0.75),na.rm=T)
cat(" ", q[2], "(", q[1], "to", q[3],") median (IQR) LoS, days\n")
cat(" ", sum(ss$DISMETH %in% c('4')), "in-hospital deaths\n")
cat(" ", sum(ss$M45), "admissions with endoscopic examination of bladder (M45)\n")
cat(" ", sum(ss$M77), "admissions with endoscopic examination of urethra (M77)\n")
cat(" ", sum(ss$M45M77), "admissions with endoscopic examination of urethra or bladder\n")
cat(" ", sum(ss$cath), "admissions with catheterization\n")

ss <- subset(SP.SUI, (SP.SUI$comb & !SP.SUI$isConfounded))
cat(nrow(ss), "patients with combination of TVT, TOT, MS\n")
q <- quantile(ss$STARTAGE, probs=c(0.25, 0.5, 0.75))
cat(" ", q[2], "(", q[1], "to", q[3],") median (IQR) age, years\n")
cat(" ", length(unique(ss$PROCEDURE3)), "different providers\n")
cat(" ", sum(ss$ADMIMETH %in% c('11', '12', '13', '81')), "elective admissions\n")
q <- quantile(ss$LoS, probs=c(0.25, 0.5, 0.75),na.rm=T)
cat(" ", q[2], "(", q[1], "to", q[3],") median (IQR) LoS, days\n")
cat(" ", sum(ss$DISMETH %in% c('4')), "in-hospital deaths\n")
cat(" ", sum(ss$M45), "admissions with endoscopic examination of bladder (M45)\n")
cat(" ", sum(ss$M77), "admissions with endoscopic examination of urethra (M77)\n")
cat(" ", sum(ss$M45M77), "admissions with endoscopic examination of urethra or bladder\n")
cat(" ", sum(ss$cath), "admissions with catheterization\n")

cat("\n")

cat("Confounded cohort characteristics\n")
cat("-----\n")
ss <- subset(SP.SUI, (SP.SUI$isConfounded))
cat(nrow(ss), "all patients\n")
q <- quantile(ss$STARTAGE, probs=c(0.25, 0.5, 0.75))
cat(" ", q[2], "(", q[1], "to", q[3],") median (IQR) age, years\n")
cat(" ", length(unique(ss$PROCEDURE3)), "different providers\n")
cat(" ", sum(ss$ADMIMETH %in% c('11', '12', '13', '81')), "elective admissions\n")
q <- quantile(ss$LoS, probs=c(0.25, 0.5, 0.75),na.rm=T)
cat(" ", q[2], "(", q[1], "to", q[3],") median (IQR) LoS, days\n")
los2 <- length(which(ss$LoS>1))
cat(' ', los2, "/", length(ss$LoS),
     "(", round(100.0*los2/length(ss$LoS),2), "%) staying longer than 1 night\n")
cat(" LoS distribution:")
ct <- as.data.frame(table(ss$LoS))
ct <- cbind(rep(c(' '), nrow(ct)), ct)
names(ct) <- c(' ', 'LoS', 'freq')
print(ct, row.names=F)

ss <- subset(SP.SUI, (!SP.SUI$comb & SP.SUI$isConfounded))
cat(nrow(ss), "patients with one of TVT, TOT or MS\n")
q <- quantile(ss$STARTAGE, probs=c(0.25, 0.5, 0.75))

```

```

cat(" ", q[2], "(", q[1], "to", q[3],") median (IQR) age, years\n")
cat(" ", length(unique(ss$PROCEDURE3)), "different providers\n")
cat(" ", sum(ss$ADMIMETH %in% c('11', '12', '13', '81')), "elective admissions\n")
q <- quantile(ss$LoS, probs=c(0.25, 0.5, 0.75),na.rm=T)
cat(" ", q[2], "(", q[1], "to", q[3],") median (IQR) LoS, days\n")
los2 <- length(which(ss$LoS>1))
cat(' ', los2, "/", length(ss$LoS),
     "(", round(100.0*los2/length(ss$LoS),2), "%) staying longer than 1 night\n")
cat("  LoS distribution:")
ct <- as.data.frame(table(ss$LoS))
ct <- cbind(rep(c(' '), nrow(ct)), ct)
names(ct) <- c(' ', 'LoS', 'freq')
print(ct, row.names=F)

ss <- subset(SP.SUI, (SP.SUI$TOT & SP.SUI$isConfounded))
cat(nrow(ss), "patients with TOT only\n")
q <- quantile(ss$STARTAGE, probs=c(0.25, 0.5, 0.75))
cat(" ", q[2], "(", q[1], "to", q[3],") median (IQR) age, years\n")
cat(" ", length(unique(ss$PROCEDURE3)), "different providers\n")
cat(" ", sum(ss$ADMIMETH %in% c('11', '12', '13', '81')), "elective admissions\n")
q <- quantile(ss$LoS, probs=c(0.25, 0.5, 0.75),na.rm=T)
cat(" ", q[2], "(", q[1], "to", q[3],") median (IQR) LoS, days\n")
cat(" ", sum(ss$DISMETH %in% c('4')), "in-hospital deaths\n")
cat(" ", sum(ss$M45), "admissions with endoscopic examination of bladder (M45)\n")
cat(" ", sum(ss$M77), "admissions with endoscopic examination of urethra (M77)\n")
cat(" ", sum(ss$M45M77), "admissions with endoscopic examination of urethra or bladder\n")
cat(" ", sum(ss$cath), "admissions with catheterization\n")

ss <- subset(SP.SUI, (SP.SUI$TVT & SP.SUI$isConfounded))
cat(nrow(ss), "patients with TVT only\n")
q <- quantile(ss$STARTAGE, probs=c(0.25, 0.5, 0.75))
cat(" ", q[2], "(", q[1], "to", q[3],") median (IQR) age, years\n")
cat(" ", length(unique(ss$PROCEDURE3)), "different providers\n")
cat(" ", sum(ss$ADMIMETH %in% c('11', '12', '13', '81')), "elective admissions\n")
q <- quantile(ss$LoS, probs=c(0.25, 0.5, 0.75),na.rm=T)
cat(" ", q[2], "(", q[1], "to", q[3],") median (IQR) LoS, days\n")
cat(" ", sum(ss$DISMETH %in% c('4')), "in-hospital deaths\n")
cat(" ", sum(ss$M45), "admissions with endoscopic examination of bladder (M45)\n")
cat(" ", sum(ss$M77), "admissions with endoscopic examination of urethra (M77)\n")
cat(" ", sum(ss$M45M77), "admissions with endoscopic examination of urethra or bladder\n")
cat(" ", sum(ss$cath), "admissions with catheterization\n")

ss <- subset(SP.SUI, (SP.SUI$MS & SP.SUI$isConfounded))
cat(nrow(ss), "patients with minisling only\n")
q <- quantile(ss$STARTAGE, probs=c(0.25, 0.5, 0.75))
cat(" ", q[2], "(", q[1], "to", q[3],") median (IQR) age, years\n")
cat(" ", length(unique(ss$PROCEDURE3)), "different providers\n")
cat(" ", sum(ss$ADMIMETH %in% c('11', '12', '13', '81')), "elective admissions\n")
q <- quantile(ss$LoS, probs=c(0.25, 0.5, 0.75),na.rm=T)
cat(" ", q[2], "(", q[1], "to", q[3],") median (IQR) LoS, days\n")
cat(" ", sum(ss$DISMETH %in% c('4')), "in-hospital deaths\n")
cat(" ", sum(ss$M45), "admissions with endoscopic examination of bladder (M45)\n")
cat(" ", sum(ss$M77), "admissions with endoscopic examination of urethra (M77)\n")
cat(" ", sum(ss$M45M77), "admissions with endoscopic examination of urethra or bladder\n")
cat(" ", sum(ss$cath), "admissions with catheterization\n")

ss <- subset(SP.SUI, (SP.SUI$comb & SP.SUI$isConfounded))
cat(nrow(ss), "patients with combination of TVT, TOT, MS\n")
q <- quantile(ss$STARTAGE, probs=c(0.25, 0.5, 0.75))
cat(" ", q[2], "(", q[1], "to", q[3],") median (IQR) age, years\n")
cat(" ", length(unique(ss$PROCEDURE3)), "different providers\n")
cat(" ", sum(ss$ADMIMETH %in% c('11', '12', '13', '81')), "elective admissions\n")
q <- quantile(ss$LoS, probs=c(0.25, 0.5, 0.75),na.rm=T)

```

```

cat(" ", q[2], "(", q[1], "to", q[3],") median (IQR) LoS, days\n")
cat(" ", sum(ss$DISMETH %in% c('4')), "in-hospital deaths\n")
cat(" ", sum(ss$M45), "admissions with endoscopic examination of bladder (M45)\n")
cat(" ", sum(ss$M77), "admissions with endoscopic examination of urethra (M77)\n")
cat(" ", sum(ss$M45M77), "admissions with endoscopic examination of urethra or bladder\n")
cat(" ", sum(ss$cath), "admissions with catheterization\n")

# -----
# save spell details
# -----
save(SP.SUI, file="data/split.Rdata")
rm(list=ls())

```

## S5.2.8 pericomp.R

```

# -----
# pericomp.R
#
# Description:
# =====
# Estimates peri-procedural complication rates.
#
# History:
# =====
# 29.02.2015. A.J. Sims. Created.
# 18.08.2015. A.J. Sims. Uses updated epimatch.
# 07.12.2015. A.J. Sims. Presence of additional main codes for repairs,
#                               renewals (e.g. M528) now tested in which.tape
#                               function.
# 10.12.2015. A.J. Sims. Added KK's additional analysis from perianalysis.R
#                               to write out additional details of cohorts and
#                               complications in confounded cohorts.
# 14.12.2015. A.J. Sims. Part to identify index spells moved to indexprocs.R.
# 15.12.2015. A.J. Sims. Speeded up identification of complications.
# -----

rm(list=ls())
source("R/epimatch.R")
source("R/inChapters.R")
source("R/inSections.R")
source("R/opcssplit.R")
source("R/opcs_has_supp.R")
source("R/icdsplit.R")
source("R/is_complication.R")
source("R/icdSubchapters.R")
source("printcomp.R")

load("data/indexprocs.Rdata")
rm(SP.SUI)
load("data/split.Rdata")

cat("\n")
cat("Summary of peri-procedural complications in both parts of cohort\n")
cat("-----\n")

# summary statistics
cat(sum(SP.SUI$hasComplication), "spells with complication\n")
cat(' ', sum(SP.SUI$hasComplication & !SP.SUI$isConfounded),
    "spells in unconfounded operations\n")
cat(' ', sum(SP.SUI$TOT & !SP.SUI$isConfounded & SP.SUI$hasComplication),
    "TOT\n")

```

```

cat(' ', sum(SP.SUI$TVT & !SP.SUI$isConfounded & SP.SUI$hasComplication),
     "TVT\n")
cat(' ', sum(SP.SUI$MS & !SP.SUI$isConfounded & SP.SUI$hasComplication),
     "minisling\n")
cat(' ', sum(SP.SUI$comb & !SP.SUI$isConfounded & SP.SUI$hasComplication),
     "combination\n")
cat(' ', sum(SP.SUI$hasComplication & SP.SUI$isConfounded),
     "spells in confounded operations\n")
cat(' ', sum(SP.SUI$TOT & SP.SUI$isConfounded & SP.SUI$hasComplication),
     "TOT\n")
cat(' ', sum(SP.SUI$TVT & SP.SUI$isConfounded & SP.SUI$hasComplication),
     "TVT\n")
cat(' ', sum(SP.SUI$MS & SP.SUI$isConfounded & SP.SUI$hasComplication),
     "minisling\n")
cat(' ', sum(SP.SUI$comb & SP.SUI$isConfounded & SP.SUI$hasComplication),
     "combination\n")

# -----
# add extra columns and tidy up which.comp so it can be analysed separately
# -----

# add information about spells
keep <- c("PSEUDO_HESID", "TOT", "TVT", "MS", "comb", "isConfounded")
which.comp <- merge(which.comp, SP.SUI[,keep], by=c("PSEUDO_HESID"), all.x=T)

# add ICD-10 subchapter and descriptions
which.comp$ICD <- with(which.comp, ifelse(is.na(MainCode), CompCode, MainCode))
which.comp$subchapter <- sapply(which.comp$ICD, FUN=icd10.subchapter)
which.comp$Description <- sapply(which.comp$ICD, FUN=icd10.description)

# print complication summary
which.comp <- printcomp(which.comp)

# -----
# additional complication analysis, aggregated by subchapter and total combined
# -----
cat("additional complication analysis - see 'table' folder\n")

# all complication codes - Unconfounded
ss <- which.comp[(which.comp$isConfounded==F & is.na(which.comp$SuppCode)) |
                 (which.comp$isConfounded==F & !is.na(which.comp$SuppCode)) |
                 (which.comp$isConfounded==F),]

if (nrow(ss) > 0) {
  ct <- with(ss, {aggregate(cbind(TVT, TOT, MS), by=list(subchapter,Description), FUN=sum)})
  if (nrow(ct)>0) {
    names(ct) <- c("subchapter", "Description","TVT", "TOT", "MS")
    Comp_Unconf_ALL <- ct[order(ct$subchapter),]
    write.csv(Comp_Unconf_ALL, "table/Comp_Unconf_ALL.csv", row.names=F)
  }
}
cat("\n")

# all complication codes - Confounded
ss <- which.comp[(which.comp$isConfounded==T & is.na(which.comp$SuppCode)) |
                 (which.comp$isConfounded==T & !is.na(which.comp$SuppCode)) |
                 (which.comp$isConfounded==T),]

if (nrow(ss) > 0) {
  ct <- with(ss, {aggregate(cbind(TVT, TOT, MS), by=list(subchapter,Description), FUN=sum)})
  if (nrow(ct)>0) {
    names(ct) <- c("subchapter", "Description","TVTc", "TOTc", "MSc")
    Comp_Conf_ALL <- ct[order(ct$subchapter),]
    write.csv(Comp_Conf_ALL, "table/Comp_Conf_ALL.csv", row.names=F)
  }
}

```

```

}
}
cat("\n")

# combined
ALL_COMP_subchap = merge(Comp_Unconf_ALL, Comp_Conf_ALL,
                        by=c("subchapter", "Description"), all=T)
ALL_COMP_subchap[is.na(ALL_COMP_subchap)] <- 0
write.csv(ALL_COMP_subchap, "table/ALL_COMP_subchap.csv")

ALL_COMP_subchap$Chapter = substr(ALL_COMP_subchap$subchapter, 1, 1)
ALL_COMP_chap = with(ALL_COMP_subchap,
                    { aggregate(cbind(TVT, TOT, MS, TVTc, TOTc, MSc), by=list(Chapter),
                                FUN=sum)})
names(ALL_COMP_chap)[1] = c("Chapter")
write.csv(ALL_COMP_chap, "table/ALL_COMP_chap.csv", row.names=F)

# -----
# save peri-procedural complications information
# -----
save(SP.SUI, which.comp, file="data/pericomp.Rdata")

rm(list=ls())

```

### S5.2.9 thirty.R

```

# -----
# thirty.R
#
# Description:
# =====
# Analysis of 30 day readmissions.
#
# History:
# =====
# 06.06.2016. A.J. Sims. Created from periproc.R.
# 07.06.2016. A.J. Sims. Added analysis of non-complication 30 day
#                   admissions from KK code.
# 14.06.2016. A.J. Sims. Use functions in interventions.R to detect 30 day
#                   admissions for further intervention.
# 24.06.2016. A.J. Sims. Added reasons for routine admission by mesh type.
# -----

# clear
rm(list=ls())

# libraries & functions
source("R/epimatch.R")
source("R/opcs_has_supp.R")
source("R/opcssplit.R")
source("R/icdsplit.R")
source("R/inSections.R")
source("R/is_complication.R")
source("R/inChapters.R")
source("R/inSections.R")
source("printcomp.R")
source("interventions.R")

# load data frames
load(file="data/indexprocs.Rdata")
rm(which.comp)

```

```

rm(SP.SUI)
load(file="data/split.Rdata")
load(file="data/sui-cleaned.Rdata")

# -----
# 30 day complication analysis
# -----

# header
cat('\n')
cat('-----\n')
cat('30 day complication analysis\n')
cat('-----\n')
cat("\n")

# add index admission dates for each subject
keep.ind <- c('PSEUDO_HESID', 'SPELL', 'ADMIDATE', 'TOT', 'TVT', 'MS', 'comb', 'isConfounded')
df.idate <- SP.SUI[, keep.ind]
names(df.idate) <- c('PSEUDO_HESID', 'SPELL.INDEX', 'ADMIDATE.INDEX',
                    'TOT', 'TVT', 'MS', 'comb', 'isConfounded')
cat(nrow(df.idate), "eligible index spells with admission date\n")
keep.ep <- c('EPI_ID', 'SPELL', 'PSEUDO_HESID', 'ADMIDATE', 'OPERTN', 'DIAG')
TH <- merge(SUI[, keep.ep], df.idate, by='PSEUDO_HESID')
TH$POD <- TH$ADMIDATE - TH$ADMIDATE.INDEX
cat(nrow(TH), "total episodes for patients with an eligible index spell\n")
rm(df.idate)

# remove episodes before index, or more than 30 days afterwards
TH <- TH[(TH$POD >= 0) & (TH$POD <= 30),]
cat(nrow(TH), "episodes on day of index spell or within 30 days\n")
cat(" ", length(unique(TH$PSEUDO_HESID)), "patients\n")

# mark those having catheter procedures
cath.codes <- quote(M472 | M473 | M475 |
                   M302 | M471 | M474 | M478 | M479 |
                   M382 | M481 | M492 | M493)
TH$cath <- sapply(TH$OPERTN, FUN=epimatch, e.codes=cath.codes)

# and those having further mesh interventions
TH$reop <- sapply(TH$OPERTN, FUN=int.anysui)

# remove index spells
TH <- TH[TH$SPELL != TH$SPELL.INDEX,]

# summary stats
cat(nrow(TH), "episodes on day of index spell or within 30 days,",
    "not including index episodes\n")
cat(" ", length(unique(TH$PSEUDO_HESID)), "patients\n")
cat(" ", length(unique(TH$PSEUDO_HESID[TH$isConfounded==F])), "unconfounded patients\n")
cat(" ", length(unique(TH$PSEUDO_HESID[TH$isConfounded==F & TH$TOT])), "TOT\n")
cat(" ", length(unique(TH$PSEUDO_HESID[TH$isConfounded==F & TH$TVT])), "TVT\n")
cat(" ", length(unique(TH$PSEUDO_HESID[TH$isConfounded==F & TH$MS])), "MS\n")
cat(" ", length(unique(TH$PSEUDO_HESID[TH$isConfounded==F & TH$comb])), "comb\n")
cat(" ", length(unique(TH$PSEUDO_HESID[TH$isConfounded==T])), "confounded patients\n")
cat(" ", length(unique(TH$PSEUDO_HESID[TH$isConfounded==T & TH$TOT])), "TOT\n")
cat(" ", length(unique(TH$PSEUDO_HESID[TH$isConfounded==T & TH$TVT])), "TVT\n")
cat(" ", length(unique(TH$PSEUDO_HESID[TH$isConfounded==T & TH$MS])), "MS\n")
cat(" ", length(unique(TH$PSEUDO_HESID[TH$isConfounded==T & TH$comb])), "comb\n")
cat(" ", nrow(TH[TH$POD==0,]), "episodes on day zero (day of index admission)\n")
#ct <- table(TH$POD)
#cat("Distribution of admission times (days):\n")
#print(ct)
cat(" ", length(unique(TH$SPELL)), "spells of admission within 30 days\n")

```

```

cat(" ", length(unique(TH$SPELL[TH$isConfounded==F])), 'spells for unconfounded patients\n')
cat(" ", length(unique(TH$SPELL[TH$isConfounded==F & TH$TOT])), 'TOT\n')
cat(" ", length(unique(TH$SPELL[TH$isConfounded==F & TH$TVT])), 'TVT\n')
cat(" ", length(unique(TH$SPELL[TH$isConfounded==F & TH$MS])), 'MS\n')
cat(" ", length(unique(TH$SPELL[TH$isConfounded==F & TH$comb])), 'comb\n')
cat(" ", length(unique(TH$SPELL[TH$isConfounded==T])), 'spells for confounded patients\n')
cat(" ", length(unique(TH$SPELL[TH$isConfounded==T & TH$TOT])), 'TOT\n')
cat(" ", length(unique(TH$SPELL[TH$isConfounded==T & TH$TVT])), 'TVT\n')
cat(" ", length(unique(TH$SPELL[TH$isConfounded==T & TH$MS])), 'MS\n')
cat(" ", length(unique(TH$SPELL[TH$isConfounded==T & TH$comb])), 'comb\n')

# create normalised complication table
comp.30 <- data.frame(PSEUDO_HESID=NA, SPELL=NA, MainCode=NA, CompCode=NA, SuppCode=NA)

# identify complications from diagnostic codes, one episode per row
is.comp <- function(row) {
  chunks <- icdsplit(unlist(row['DIAG'], use.names=F)) # break into sequences
  chunks <- chunks[1] # only the first
  if (length(chunks) == 0) {
    return(F)
  }
  chunk.MT <- sapply(chunks, FUN=is.complication) # main and trigger codes, if any
  chunk.MT <- as.data.frame(t(chunk.MT)) # in columns
  chunk.MT <- chunk.MT[!is.na(chunk.MT$MainCode) | !is.na(chunk.MT$CompCode),]
  if (nrow(chunk.MT)>0) {
    chunk.MT <- cbind(SPELL=row['SPELL'], PSEUDO_HESID=row['PSEUDO_HESID'], chunk.MT)
    comp.30 <-<- rbind(comp.30, chunk.MT)
  }
  return(nrow(chunk.MT)>0)
}

# find episodes with complication
TH$hasComplication <- apply(TH, 1, FUN=is.comp)

# tidy up comp.30
narrow <- apply(comp.30, 1, function(x) all(is.na(x)))
comp.30 <- comp.30[!narrow, ]

# add information about patients (merge with index spells on PSEUDO_HESID)
keep <- c("PSEUDO_HESID", "TOT", "TVT", "MS", "comb", "isConfounded")
comp.30 <- merge(comp.30, SP.SUI[,keep], by=c("PSEUDO_HESID"), all.x=T)

cat(sum(TH$hasComplication), "thirty day episodes admitted for a complication\n")
bad.spells <- unique(TH$SPELL[TH$hasComplication])
cat(" ", length(bad.spells), "spells\n")
cat(" ", length(unique(TH$PSEUDO_HESID[TH$hasComplication])), "patients\n")
cat(" ", nrow(TH[TH$POD==0 & TH$hasComplication,]),
    "episodes on day zero (day of index admission)\n")

# summary stats
cat(sum(TH$hasComplication & !TH$isConfounded),
    "thirty day episodes admitted for complication following unconfounded operation:\n")
ne <- sum(TH$TOT & !TH$isConfounded & TH$hasComplication)
ns <- length(unique(TH$SPELL[TH$TOT & !TH$isConfounded & TH$hasComplication]))
np <- length(unique(TH$PSEUDO_HESID[TH$TOT & !TH$isConfounded & TH$hasComplication]))
cat(' ', ne, "episodes,", ns, "spells,", np, "patients (TOT)\n")
nrs <- length(unique(TH$SPELL[TH$TOT & !TH$isConfounded & TH$hasComplication & TH$reop]))
nrp <- length(unique(TH$PSEUDO_HESID[TH$TOT & !TH$isConfounded & TH$hasComplication & TH$reop]))
cat(' ', nrs, "spells,", nrp, "patients have re-intervention (TOT)\n")

ne <- sum(TH$TVT & !TH$isConfounded & TH$hasComplication)
ns <- length(unique(TH$SPELL[TH$TVT & !TH$isConfounded & TH$hasComplication]))
np <- length(unique(TH$PSEUDO_HESID[TH$TVT & !TH$isConfounded & TH$hasComplication]))

```

```

cat(' ', ne, "episodes,", ns, "spells,", np, "patients (TVT)\n")
nrs <- length(unique(TH$SPELL[TH$TVT & !TH$isConfounded & TH$hasComplication & TH$reop]))
nrp <- length(unique(TH$PSEUDO_HESID[TH$TVT & !TH$isConfounded & TH$hasComplication & TH$reop]))
cat(' ', nrs, "spells,", nrp, "patients have re-intervention (TVT)\n")

ne <- sum(TH$MS & !TH$isConfounded & TH$hasComplication)
ns <- length(unique(TH$SPELL[TH$MS & !TH$isConfounded & TH$hasComplication]))
np <- length(unique(TH$PSEUDO_HESID[TH$MS & !TH$isConfounded & TH$hasComplication]))
cat(' ', ne, "episodes,", ns, "spells,", np, "patients (MS)\n")
nrs <- length(unique(TH$SPELL[TH$MS & !TH$isConfounded & TH$hasComplication & TH$reop]))
nrp <- length(unique(TH$PSEUDO_HESID[TH$MS & !TH$isConfounded & TH$hasComplication & TH$reop]))
cat(' ', nrs, "spells,", nrp, "patients have re-intervention (MS)\n")

ne <- sum(TH$comb & !TH$isConfounded & TH$hasComplication)
ns <- length(unique(TH$SPELL[TH$comb & !TH$isConfounded & TH$hasComplication]))
np <- length(unique(TH$PSEUDO_HESID[TH$comb & !TH$isConfounded & TH$hasComplication]))
cat(' ', ne, "episodes,", ns, "spells,", np, "patients (comb)\n")
nrs <- length(unique(TH$SPELL[TH$comb & !TH$isConfounded & TH$hasComplication & TH$reop]))
nrp <- length(unique(TH$PSEUDO_HESID[TH$comb & !TH$isConfounded & TH$hasComplication & TH$reop]))
cat(' ', nrs, "spells,", nrp, "patients have re-intervention (comb)\n")

cat(sum(TH$hasComplication & TH$isConfounded),
     "thirty day episodes admitted for complication following confounded operation:\n")
ne <- sum(TH$TOT & TH$isConfounded & TH$hasComplication)
ns <- length(unique(TH$SPELL[TH$TOT & TH$isConfounded & TH$hasComplication]))
np <- length(unique(TH$PSEUDO_HESID[TH$TOT & TH$isConfounded & TH$hasComplication]))
cat(' ', ne, "episodes,", ns, "spells,", np, "patients (TOT)\n")
nrs <- length(unique(TH$SPELL[TH$TOT & TH$isConfounded & TH$hasComplication & TH$reop]))
nrp <- length(unique(TH$PSEUDO_HESID[TH$TOT & TH$isConfounded & TH$hasComplication & TH$reop]))
cat(' ', nrs, "spells,", nrp, "patients have re-intervention (TOT)\n")

ne <- sum(TH$TVT & TH$isConfounded & TH$hasComplication)
ns <- length(unique(TH$SPELL[TH$TVT & TH$isConfounded & TH$hasComplication]))
np <- length(unique(TH$PSEUDO_HESID[TH$TVT & TH$isConfounded & TH$hasComplication]))
cat(' ', ne, "episodes,", ns, "spells,", np, "patients (TVT)\n")
nrs <- length(unique(TH$SPELL[TH$TVT & TH$isConfounded & TH$hasComplication & TH$reop]))
nrp <- length(unique(TH$PSEUDO_HESID[TH$TVT & TH$isConfounded & TH$hasComplication & TH$reop]))
cat(' ', nrs, "spells,", nrp, "patients have re-intervention (TVT)\n")

ne <- sum(TH$MS & TH$isConfounded & TH$hasComplication)
ns <- length(unique(TH$SPELL[TH$MS & TH$isConfounded & TH$hasComplication]))
np <- length(unique(TH$PSEUDO_HESID[TH$MS & TH$isConfounded & TH$hasComplication]))
cat(' ', ne, "episodes,", ns, "spells,", np, "patients (MS)\n")
nrs <- length(unique(TH$SPELL[TH$MS & TH$isConfounded & TH$hasComplication & TH$reop]))
nrp <- length(unique(TH$PSEUDO_HESID[TH$MS & TH$isConfounded & TH$hasComplication & TH$reop]))
cat(' ', nrs, "spells,", nrp, "patients have re-intervention (MS)\n")

ne <- sum(TH$comb & TH$isConfounded & TH$hasComplication)
ns <- length(unique(TH$SPELL[TH$comb & TH$isConfounded & TH$hasComplication]))
np <- length(unique(TH$PSEUDO_HESID[TH$comb & TH$isConfounded & TH$hasComplication]))
cat(' ', ne, "episodes,", ns, "spells,", np, "patients (comb)\n")
nrs <- length(unique(TH$SPELL[TH$comb & TH$isConfounded & TH$hasComplication & TH$reop]))
nrp <- length(unique(TH$PSEUDO_HESID[TH$comb & TH$isConfounded & TH$hasComplication & TH$reop]))
cat(' ', nrs, "spells,", nrp, "patients have re-intervention (comb)\n")

# print complication summary
comp.30 <- printcomp(comp.30)

# analysis of those admitted within 30 days without a complication
cat("\n")
cat("30 day admissions without complication\n")
cat("-----\n")

```



```

"%w/o%" <- function(x, y) x[!x %in% y]
good.spells <- unique(TH$SPELL) %w/o% bad.spells
cat(length(good.spells), "thirty day spells without admission for complication\n")
cohort <- unique(TH$PSEUDO_HESID[TH$SPELL %in% good.spells])
cat("  ", length(cohort), "patients\n")
THNC <- TH[TH$SPELL %in% good.spells,]
THNC <- THNC[order(THNC$PSEUDO_HESID, THNC$ADMIDATE),]
cat("  ", nrow(THNC), "episodes\n")
cat("\n")

# function to summarise 30 day readmissions without complication
th.routine <- function(df) {

  # total number of admissions
  cat(nrow(df), "thirty day episodes\n")
  cat('  ', length(unique(df$SPELL)), "spells\n")
  cat('  ', length(unique(df$PSEUDO_HESID)), "patients\n")

  # those with catheter procedures
  cat(sum(df$cath), "thirty day episodes with catheter-related procedures\n")
  df.cath <- aggregate(df[, "cath"], by=list(df$SPELL), FUN=any)
  names(df.cath) <- c("SPELL", "cath")
  cat('  ', sum(df.cath$cath), "spells involving (but not limited to) catheter procedures\n")

  # those having further mesh interventions
  cat(sum(df$reop), "thirty day episodes with mesh-related re-interventions\n")
  df.reop <- aggregate(df[, "reop"], by=list(df$SPELL), FUN=any)
  names(df.reop) <- c("SPELL", "reop")
  cat('  ', sum(df.reop$reop), "spells involving (but not limited to) mesh re-interventions\n")

  # those with no procedure
  df$noop <- is.na(df$OPERTN)
  cat(sum(df$noop), "thirty day episodes with no procedure\n")
  df.noop <- aggregate(df[, "noop"], by=list(df$SPELL), FUN=all)
  names(df.noop) <- c("SPELL", "noop")
  cat('  ', sum(df.noop$noop), "spells with no procedure\n")

  # discount those with no confounding therapeutic procedures
  df$confound <- sapply(df$OPERTN, FUN=function(codes) {
    wlChapters <- c("U", "Y", "Z")
    wlSections <- c("A18", "A55", "E25", "E36", "E37", "E49", "E51", "E63", "G16", "G19",
      "G45", "G55", "G65", "G80", "H22", "H25", "H28", "H68", "H69", "H70",
      "J09", "J13", "J25", "J43", "J44", "J45", "J67", "K51", "K58", "L72",
      "L95", "M11", "M45", "M77", "M85", "Q18", "Q39", "Q50", "R02",
      "R05", "T11", "T43", "W36", "W87", "W88",
      "Q55",
      "E85", "E86", "E87", "E88", "E89", "E90", "E91",
      "E92", "E93", "E94", "E95", "E96", "E97", "E98",
      "O11", "O12", "O13", "O14", "O16", "O28", "O30", "O31", "O33")
    wlCodes <- c("A843",
      "H444",
      "M496",
      "P273",
      "M301", "M303", "M304", "M305", "M306", "M308", "M309")

    # an empty character vector (if no confounding ops)
    no.ops <- character(0)

    # to start, all codes might confound
    confcodes <- codes
    if (length(confcodes)==0) return(no.ops)
  })
}

```

```

# remove NA codes
mat <- (confcodes %in% c(NA))
confcodes <- confcodes[which(mat==F)]
if (length(confcodes)==0) return(no.ops)

# are any codes in white list chapters?
mat <- (confcodes %in% Chapters% wlChapters)
confcodes <- confcodes[which(mat==F)]
if (length(confcodes)==0) return(no.ops)

# are any codes in white list sections?
mat <- (confcodes %in% Sections% wlSections)
confcodes <- confcodes[which(mat==F)]
if (length(confcodes)==0) return(no.ops)

# are any codes in white list codes?
mat <- (confcodes %in% wlCodes)
confcodes <- confcodes[which(mat==F)]
if (length(confcodes)==0) return(no.ops)
return(confcodes)
})
df$noconf <- sapply(df$confound, FUN=function(confcodes) {return(length(confcodes)==0)})
cat(sum(df$noconf), "episodes with no confounding procedure\n")
df.noconf <- aggregate(df[, "noconf"], by=list(df$SPELL), FUN=all)
names(df.noconf) <- c("SPELL", "noconf")
cat(' ', sum(df.noconf$noconf), "spells no confounding procedure \n")
cat(' ', sum(df.noconf$noconf)-sum(df.noop$noop),
     "spells with procedures but no confounding procedures \n")
}

cat("30 day readmissions with no complication - whole cohort:\n")
cat("-----\n")
th.routine(THNC)
cat("\n")

cat("30 day readmissions with no complication - unconfounded cohort:\n")
cat("-----\n")
th.routine(THNC[!THNC$isConfounded,])
cat("\n")

cat("30 day readmissions with no complication - unconfounded TVT:\n")
cat("-----\n")
th.routine(THNC[!THNC$isConfounded & THNC$TVT,])
cat("\n")

cat("30 day readmissions with no complication - unconfounded TOT:\n")
cat("-----\n")
th.routine(THNC[!THNC$isConfounded & THNC$TOT,])
cat("\n")

cat("30 day readmissions with no complication - unconfounded MS:\n")
cat("-----\n")
th.routine(THNC[!THNC$isConfounded & THNC$MS,])
cat("\n")

cat("30 day readmissions with no complication - confounded cohort:\n")
cat("-----\n")
th.routine(THNC[THNC$isConfounded,])
cat("\n")

cat("30 day readmissions with no complication - confounded TVT:\n")
cat("-----\n")
th.routine(THNC[THNC$isConfounded & THNC$TVT,])

```

```

cat("\n")

cat("30 day readmissions with no complication - confounded TOT:\n")
cat("-----\n")
th.routine(THNC[THNC$isConfounded & THNC$TOT,])
cat("\n")

cat("30 day readmissions with no complication - confounded MS:\n")
cat("-----\n")
th.routine(THNC[THNC$isConfounded & THNC$MS,])
cat("\n")

# save thirty day details
save(TH, comp.30, file="data/thirty.Rdata")

# -----
# clean up
# -----
rm(list=ls())

```

### S5.2.10 postproc.R

```

# -----
# postproc.R
#
# Description:
# =====
# Creates post-procedure event tables for survival and history analysis.
#
# History:
# =====
# 29.09.2015. A.J. Sims. Created.
# 03.12.2015. A.J. Sims. Includes all event types; table generation only.
# 06.06.2016. A.J. Sims. 30 day readmission analysis moved to thirty.R.
# -----

# clear
rm(list=ls())

# libraries & functions
source("R/epimatch.R")
source("R/opcs_has_supp.R")
source("R/opcssplit.R")
source("R/icdsplit.R")
source("R/inSections.R")
source("R/is_complication.R")
source("printcomp.R")
source("interventions.R")

# load data frames
load(file="data/indexprocs.Rdata")
rm(which.comp)
rm(SP.SUI)
load(file="data/split.Rdata")
load(file="data/sui-cleaned.Rdata")
load(file="data/thirty.Rdata")
rm(comp.30)

# header
cat('\n')

```

```

cat('-----\n')
cat('Post-procedural analysis\n')
cat('-----\n')
cat("\n")

# -----
# count episodes before and after index spells
# -----
cat("Counting episodes pre- and post- index\n")
cat("-----\n")

# index admission dates by person
keep.ind <- c('PSEUDO_HESID', 'SPELL', 'ADMIDATE')
df.idate <- SUI[SUI$Index==T, keep.ind]
names(df.idate) <- c('PSEUDO_HESID', 'SPELL.INDEX', 'ADMIDATE.INDEX')

# add index admission details for later comparison
keep.ep <- c('EPI_ID', 'SPELL', 'PSEUDO_HESID', 'ADMIDATE')
NIEP.SUI <- merge(SUI[, keep.ep], df.idate, by='PSEUDO_HESID')
cat(nrow(NIEP.SUI), "total episodes\n")
rm(df.idate)

# count pre-and post (and index) episodes
# nb this assumes anything on or before the data of index is a pre-index
# spell (not always true, but very small error)
lv.pre <- with(NIEP.SUI, (SPELL != SPELL.INDEX) & (ADMIDATE <= ADMIDATE.INDEX))
lv.pst <- with(NIEP.SUI, (SPELL != SPELL.INDEX) & (ADMIDATE > ADMIDATE.INDEX))
lv.ndx <- with(NIEP.SUI, (SPELL == SPELL.INDEX))
cat(sum(lv.ndx), "episodes in index spells\n")
cat(sum(lv.pre), "episodes before index spells\n")
cat(sum(lv.pst), "episodes after index spells\n")
cat("\n")

rm(NIEP.SUI)
rm(lv.ndx)
rm(lv.pre)
rm(lv.pst)

# -----
# event table for in-hospital deaths
# -----
cat("In-hospital deaths\n")
cat("-----\n")

# episodes
keep <- c('PSEUDO_HESID', 'SPELL', 'DISDATE')
event.death <- SUI[SUI$DISMETH==4, keep]
cat(nrow(event.death), "in-hospital death episodes\n")

# spells
event.death <- with(event.death, aggregate(DISDATE, by=list(PSEUDO_HESID, SPELL), FUN=min))
names(event.death) <- c('PSEUDO_HESID', 'SPELL', 'date.death')
cat(nrow(event.death), "in-hospital death spells\n")

# add start times (admission date of index procedure)
keep <- c('PSEUDO_HESID', 'ADMIDATE')
event.ndx <- with(SP.SUI, SP.SUI[PSEUDO_HESID %in% event.death$PSEUDO_HESID, keep])
names(event.ndx) <- c('PSEUDO_HESID', 'date.index')
event.death <- merge(event.death, event.ndx, by='PSEUDO_HESID', sort=F)
cat(nrow(event.death), "in-hospital death spells for SUI cohort\n")

# add time and status for survival analysis
event.death$time <- as.numeric(event.death$date.death-event.death$date.index)

```

```

event.death$status <- 0

# order it
event.death <- event.death[order(event.death$PSEUDO_HESID, event.death$time),]

# remove patients who died before index (should be none!)
before <- (event.death$time <= 0)
cat(sum(before), "patients died before index procedure\n")
if (sum(before) > 0) {
  print(event.death[before,])
  event.death <- event.death[!before, , drop=T]
}

# check for patients who died twice
dup <- duplicated(event.death$PSEUDO_HESID)
cat(sum(dup), "duplicated PSEUDO_HESID in death events\n")
if (any(dup)) {
  #who <- event.death$PSEUDO_HESID[dup, drop=T]
  #print(event.death[event.death$PSEUDO_HESID %in% who,])
  event.death <- event.death[!dup,]
}

cat(nrow(event.death), "in-hospital death spells\n")
cat(" ", length(unique(event.death$PSEUDO_HESID)), "different patients\n")
cat(nrow(event.death[event.death$time <= 30,]),
     "in-hospital death spells within 30 days\n")
cat(" ", length(unique(event.death$PSEUDO_HESID[event.death$time<=30])),
     "different patients\n")
cohort.unconf <- with(SP.SUI, PSEUDO_HESID[isConfounded==F])
cat(nrow(event.death[event.death$time <= 30 &
                    event.death$PSEUDO_HESID %in% cohort.unconf,]),
     "in-hospital death spells within 30 days (unconfounded cohort)\n")
cat(" ",
     length(unique(event.death$PSEUDO_HESID[event.death$time<=30 &
                    event.death$PSEUDO_HESID %in% cohort.unconf])),
     "different patients (unconfounded cohort)\n")

cat("\n")

# -----
# event table for time-in-study for subjects who did not die in-hospital
# -----
cat("Patients who survived to the end of study\n")
cat("-----\n")

# all patients who survived to study end
keep <- c('PSEUDO_HESID', 'ADMIDATE')
event.alive <- SP.SUI[!(SP.SUI$PSEUDO_HESID %in% event.death$PSEUDO_HESID), keep]
names(event.alive) <- c('PSEUDO_HESID', 'date.index')

# latest date of follow-up
event.alive$date.censor <- max(SUI$ADMIDATE)
event.alive$time <- as.numeric(event.alive$date.censor - event.alive$date.index)
event.alive$status <- 0
cat(nrow(event.alive), "patients alive at end of study period\n")

# anyone in both cohorts?
da <- intersect(event.alive$PSEUDO_HESID, event.death$PSEUDO_HESID)
cat(length(da), "patients who were in both dead and alive cohorts\n")
if (length(da) > 0) {
  print(da)
}

```

```

# total time in study
n.fu <- nrow(event.death)+nrow(event.alive)
cat(n.fu, "patients in SUI cohort with index procedure\n")
t.fu <- sum(event.death$time)+sum(event.alive$time)
cat(t.fu, "total follow-up (days)\n")
cat(round(t.fu/n.fu, digits=1), "days mean follow-up\n")
cat("\n")

# -----
# event table for admissions due to relevant symptoms
# -----
cat("Admissions due to relevant symptoms\n")
cat("-----\n")

# admissions for pain
SUI$Pain <- sapply(SUI$DIAG, FUN=function(diag){
  pain.codes <- c('R100', 'R102', 'R103', 'R104', 'R10X',
                 'R300', 'R301', 'R309', 'R30X',
                 'N941')

  pain <- F
  if (diag[1] %in% pain.codes) {
    pain <- T
  }
  return(pain)
})
cat(sum(SUI$Pain), "episodes admitted for pain\n")

# admissions for abnormal bleeding
SUI$Bleeding <- sapply(SUI$DIAG, FUN=function(diag){
  bleeding.codes <- c('N930', 'N938', 'N939', 'N93X')
  bleed <- F
  if (diag[1] %in% bleeding.codes) {
    bleed <- T
  }
  return(bleed)
})
cat(sum(SUI$Bleeding), "episodes admitted for abnormal bleeding\n")

# complications relating to the procedure, including injuries
SUI$Complication <- sapply(SUI$DIAG, FUN=function(diag){
  compcodes <- c('T812', 'T817',
               'T810', 'T811', 'T813', 'T814', 'T815', 'T816', 'T818', 'T819')
  maincodes <- c('S345', 'S346', 'S348', 'S357', 'S358', 'S359',
               'S365', 'S367', 'S368', 'S369',
               'S370', 'S371', 'S372', 'S373', 'S377', 'S378', 'S379',
               'S390', 'S396', 'S397', 'S398', 'S399')
  suppcodes <- c('Y600', 'Y608')
  chunks <- icdsplit(diag)
  comp <- F
  if (any(compcodes %in% chunks[[1]])) {
    comp <- T
  }
  if (any(maincodes %in% chunks[[1]]) & any(suppcodes %in% chunks[[1]])) {
    comp <- T
  }
  return(comp)
})
cat(sum(SUI$Complication), "episodes admitted for previous procedural complication\n")

# complications of devices, implants and grafts
SUI$Device <- sapply(SUI$DIAG, FUN=function(diag){
  compcodes <- c('T831', 'T834', 'T835', 'T836', 'T837', 'T838', 'T839')
  suppcodes <- c('Y732', 'Y733')

```

```

chunks <- icdsplit(diag)
dig <- F
if (any(compcodes %in% chunks[[1]])) {
  dig <- T
}
if (any(suppcodes %in% chunks[[1]])) {
  dig <- T
}
return(dig)
})
cat(sum(SUI$Device), "episodes admitted for previous complication of devices\n")
cat("\n")

# episodes of admission for relevant symptoms (device complications only)
keep <- c('PSEUDO_HESID', 'SPELL', 'ADMIDATE', 'DIAG',
          'Pain', 'Bleeding', 'Complication', 'Device')
event.symptoms <- SUI[SUI$Device==T, keep]

# spells of admission for relevant symptoms
event.symptoms <- event.symptoms[order(event.symptoms$SPELL, event.symptoms$ADMIDATE),]
keep <- c("SPELL", "ADMIDATE")
dup <- duplicated(event.symptoms[,keep])
event.symptoms <- event.symptoms[!dup,]
names(event.symptoms) <- c('PSEUDO_HESID', 'SPELL', 'date.symptoms', 'DIAG',
                          'Pain', 'Bleeding', 'Complication', 'Device')
cat(nrow(event.symptoms),
    "spells with admission for relevant symptoms (device complications only)\n")

# add start times (admission date of index procedure)
keep <- c('PSEUDO_HESID', 'ADMIDATE')
event.ndx <- with(SP.SUI, SP.SUI[PSEUDO_HESID %in% event.symptoms$PSEUDO_HESID, keep])
names(event.ndx) <- c('PSEUDO_HESID', 'date.index')
event.symptoms <- merge(event.symptoms, event.ndx, by='PSEUDO_HESID')
cat(nrow(event.symptoms), "spells admitted for relevant symptoms in SUI cohort\n")

# add time and status for survival analysis
event.symptoms$time <- with(event.symptoms, as.numeric(date.symptoms-date.index))
event.symptoms$status <- 1

# remove patients admitted for pain before index
before <- which(event.symptoms$time < 0)
cat(length(before), "spells admitted for relevant symptoms before index procedure\n")
if (length(before) > 0) {
  event.symptoms <- event.symptoms[-before,]
}
cat(nrow(event.symptoms), "spells admitted for relevant symptoms after index procedure\n")

# remove spells which are index episodes
pain.at.index <- event.symptoms$SPELL %in% SP.SUI$SPELL
cat(sum(pain.at.index),
    "spells admitted for relevant symptoms which are also index episodes - removed\n")
event.symptoms <- event.symptoms[!pain.at.index,]

# remove spells which are admissions for complication within 30 days
pain.at.30 <- event.symptoms$SPELL %in% unique(TH$SPELL[TH$hasComplication])
cat(sum(pain.at.30),
    "spells admitted for relevant symptoms which are 30 day complication episodes - removed\n")
event.symptoms <- event.symptoms[!pain.at.30,]

cat(nrow(event.symptoms),
    "qualifying spells admitted for relevant symptoms for analysis\n")

# get the reason for admission for each spell

```

```

cat("\n")

cat(sum(event.symptoms$Pain), "spells for pain;",
     length(unique(event.symptoms$PSEUDO_HESID[event.symptoms$Pain==T])), "patients\n")
cat(sum(event.symptoms$Bleeding), "spells for bleeding;",
     length(unique(event.symptoms$PSEUDO_HESID[event.symptoms$Bleeding==T])), "patients\n")
cat(sum(event.symptoms$Complication), "spells for previous complication;",
     length(unique(event.symptoms$PSEUDO_HESID[event.symptoms$Complication==T])), "patients\n")
cat(sum(event.symptoms$Device), "spells for previous device complication;",
     length(unique(event.symptoms$PSEUDO_HESID[event.symptoms$Device==T])), "patients\n")

cat("\n")

# -----
# event table for admissions with pain (in any field)
# -----
cat("Admissions with pain (in any field)\n")
cat("-----\n")

pain.codes <- c('R100', 'R101', 'R102', 'R103', 'R104', 'R10X',
               'N930', 'N938', 'N939', 'N93X',
               'N941',
               'M726',
               'K613')

# find episodes
SUI$WithPain <- sapply(SUI$DIAG, FUN=function(diag) {
  ispain <- diag %in% pain.codes
  return(any(ispain))
})
cat(sum(SUI$WithPain), "episodes admitted with pain (", pain.codes, ")\n")

# episodes of admission with pain
keep <- c('PSEUDO_HESID', 'SPELL', 'ADMIDATE', 'DIAG')
event.withpain <- SUI[SUI$WithPain==T, keep]

# spells of admission with pain
event.withpain <- event.withpain[order(event.withpain$SPELL, event.withpain$ADMIDATE),]
keep <- c("SPELL", "ADMIDATE")
dup <- duplicated(event.withpain[,keep])
event.withpain <- event.withpain[!dup,]
names(event.withpain) <- c('PSEUDO_HESID', 'SPELL', 'date.withpain', "DIAG")
cat(nrow(event.withpain), "spells with admission with pain\n")

# change diagnosis to reason (R10, N93, N94) - use first pain code
event.withpain$reason <- sapply(event.withpain$DIAG, FUN=function(diag) {
  z <- substr(diag,1,3) %in% c('R10', 'N93', 'N94', 'M72', 'K61')
  first <- which(z)[1]
  return(substr(diag[first],1,3))
})
event.withpain$DIAG <- NULL

# add start times (admission date of index procedure)
keep <- c('PSEUDO_HESID', 'ADMIDATE')
event.ndx <- with(SP.SUI, SP.SUI[PSEUDO_HESID %in% event.withpain$PSEUDO_HESID, keep])
names(event.ndx) <- c('PSEUDO_HESID', 'date.index')
event.withpain <- merge(event.withpain, event.ndx, by='PSEUDO_HESID')
cat(nrow(event.withpain), "spells admitted with pain in SUI cohort\n")

# add time and status for survival analysis
event.withpain$time <- with(event.withpain, as.numeric(date.withpain-date.index))
event.withpain$status <- 1

```



```

# remove patients admitted for pain before index
before <- which(event.withpain$time < 0)
cat(length(before), "spells admitted with pain before index procedure\n")
if (length(before > 0)) {
  event.withpain <- event.withpain[-before,]
}
cat(nrow(event.withpain), "spells admitted with pain after index procedure\n")

# remove spells which are index episodes
pain.at.index <- event.withpain$SPELL %in% SP.SUI$SPELL
cat(sum(pain.at.index),
     "spells admitted with pain which are also index episodes - removed\n")
event.withpain <- event.withpain[!pain.at.index,]

# remove spells which are admissions for complication within 30 days
pain.at.30 <- event.withpain$SPELL %in% unique(TH$SPELL[TH$hasComplication])
cat(sum(pain.at.30),
     "spells admitted with pain which are 30 day complication episodes - removed\n")
event.withpain <- event.withpain[!pain.at.30,]

cat(nrow(event.withpain),
     "qualifying spells admitted with pain for analysis\n")

# get the reason for admission for each spell
lv.R10 <- event.withpain$reason=='R10'
lv.N93 <- event.withpain$reason=='N93'
lv.N94 <- event.withpain$reason=='N94'
lv.M72 <- event.withpain$reason=='M72'
lv.K61 <- event.withpain$reason=='K61'
cat(sum(lv.R10), "spells with abdo+pelvic pain (R10);",
     length(unique(event.withpain$PSEUDO_HESID[lv.R10])), "patients\n")
cat(sum(lv.N93), "spells with vaginal bleeding (N93);",
     length(unique(event.withpain$PSEUDO_HESID[lv.N93])), "patients\n")
cat(sum(lv.N94), "spells with dyspareunia (N94);",
     length(unique(event.withpain$PSEUDO_HESID[lv.N94])), "patients\n")
cat(sum(lv.M72), "spells with necrotising fasciitis (M72.6);",
     length(unique(event.withpain$PSEUDO_HESID[lv.M72])), "patients\n")
cat(sum(lv.K61), "spells with ischiorectal abscess (K61.3);",
     length(unique(event.withpain$PSEUDO_HESID[lv.K61])), "patients\n")
cat("\n")

# -----
# event table for admissions including a re-intervention
# -----
cat("Admissions including re-intervention\n")
cat("-----\n")

# find all episodes with qualifying intervention
SUI$Op <- sapply(SUI$OPERTN, FUN=int.anysui)
cat(sum(SUI$Op), "episodes including SUI mesh intervention\n")

# select episodes of admission including re-intervention
keep <- c('PSEUDO_HESID', 'SPELL', 'ADMIDATE', 'OPERTN')
event.op <- SUI[SUI$Op==T, keep]

# spells of admission including re-intervention
event.op <- event.op[order(event.op$SPELL, event.op$ADMIDATE),]
keep <- c("SPELL", "ADMIDATE")
dup <- duplicated(event.op[,keep])
event.op <- event.op[!dup,]
names(event.op) <- c('PSEUDO_HESID', 'SPELL', 'date.op', "OPERTN")
cat(nrow(event.op), "spells with SUI mesh intervention\n")

```

```

# add start times (admission date of index procedure)
keep <- c('PSEUDO_HESID', 'ADMIDATE')
event.ndx <- with(SP.SUI, SP.SUI[PSEUDO_HESID %in% event.op$PSEUDO_HESID, keep])
names(event.ndx) <- c('PSEUDO_HESID', 'date.index')
event.op <- merge(event.op, event.ndx, by='PSEUDO_HESID')
cat(nrow(event.op), "spells with SUI mesh intervention in SUI cohort\n")

# add time and status for survival analysis
event.op$time <- with(event.op, as.numeric(date.op-date.index))
event.op$status <- 1

# remove patients admitted for intervention before index (should be none!)
before <- which(event.op$time < 0)
cat(length(before), "spells with intervention for SUI mesh before index procedure\n")
if (length(before) > 0) {
  print(event.op[before,])
  event.op <- event.op[-before,]
}
cat(nrow(event.op), "spells with SUI intervention remaining\n")

# remove spells which are index episodes
op.at.index <- event.op$SPELL %in% SP.SUI$SPELL
cat(sum(op.at.index),
     "spells with SUI intervention which are also index episodes - removed\n")
event.op <- event.op[!op.at.index,]

# remove spells which are admissions for complication within 30 days
op.at.30 <- event.op$SPELL %in% unique(TH$SPELL[TH$hasComplication])
cat(sum(op.at.30),
     "spells admitted for intervention which are 30 day complication spells - removed\n")
event.op <- event.op[!op.at.30,]

cat(nrow(event.op),
     "qualifying spells admitted with SUI intervention for analysis\n")

# give reason for re-intervention (repair, re-do etc)

# (new introductions)
event.op$intro <- sapply(event.op$OPERTN, FUN=int.introduction)
cat(' ', sum(event.op$intro), "introductions\n")

# (specific repairs)
event.op$repair <- sapply(event.op$OPERTN, FUN=int.repair)
cat(' ', sum(event.op$repair), "repairs\n")

# (removals)
event.op$removal <- sapply(event.op$OPERTN, FUN=int.removal)
cat(' ', sum(event.op$removal), "removals\n")

# (renewals)
event.op$renewal <- sapply(event.op$OPERTN, FUN=int.renewal)
cat(' ', sum(event.op$renewal), "renewals\n")

cat("\n")

# -----
# save event tables
# -----
save(event.alive, event.death, event.symptoms, event.withpain, event.op,
     file="data/events.Rdata")

# -----
# clean up

```

```
# -----
rm(list=ls())
```

## S5.2.11 history.R

```
# -----
# history.R
#
# Description:
# =====
# Survival and history analysis using event tables.
#
# History:
# =====
# 03.12.2015. A.J. Sims. Created.
# 07.12.2015. A.J. Sims. Report patient numbers for events in each cohort.
# 14.12.2015. A.J. Sims. Added KK's history illustration figure, and changed
# graphs to 5 y survival.
# 05.01.2016. A.J. Sims. Added grouping of insertions, repairs etc.
# 27.06.2016. A.J. Sims. Added distribution of admissions for all events.
# 30.06.2016. A.J. Sims. Added hazard plots.
# -----

rm(list=ls())
library("survival")
library("muhaz")
source("pubfig.R")

# -----
# read data frames
# -----
load(file="data/indexprocs.Rdata")
rm(SP.SUI)
load("data/split.Rdata")
load(file="data/events.Rdata")

# -----
# figure to illustrate histories
# -----
cat("\n")
cat("draw example history figure\n")
cat("-----\n")

# patients to include
egp <- c("04016F8DDB727A30470F85C3F259A013",
        "2C9C9A9ECF90CD919362EC8CF3B6E824",
        "16483772CDE7ABF200AB3868ED90E804",
        "047DAC7480FC448A0332A1BAA40861CF")

# build data frames of times
ev <- subset(event.op, PSEUDO_HESID %in% egp, select=c(PSEUDO_HESID, time, status))
ev$status <- 4
evt <- subset(event.symptoms, PSEUDO_HESID %in% egp, select=c(PSEUDO_HESID, time, status))
evt$status <- 1
ev <- rbind(ev, evt)
evt <- subset(event.alive, PSEUDO_HESID %in% egp, select=c(PSEUDO_HESID, time, status))
evt$status <- 15
ev <- rbind(ev, evt)
evt <- subset(event.death, PSEUDO_HESID %in% egp, select=c(PSEUDO_HESID, time, status))
evt$status <- 0
ev <- rbind(ev, evt)
```

```

rm(evt)
ev <- ev[order(ev$time),]

# set up plot frame
pubfig("history")
pv <- par(no.readonly=T)
par(las=1, mar=c(5,5,0.5,0.75))
y <- 0.5
plot(NA,
     type="l",
     xlab="Time (days)",
     ylab="Example patient",
     xlim=c(0,2500),
     ylim=c(0,2.25),
     yaxt = "n")
yv <- c(0.5,1,1.5,2)
axis(2,at=yv,labels=c("4","3","2","1"))

for (p in 1:length(egp)) {
  pts <- with(ev[ev$PSEUDO_HESID==egp[p],], data.frame(x=time, y=yv[p], pch=status))
  pts <- rbind(pts, c(x=0, y=yv[p], pch=124)) # start character '/'
  with(pts, lines(x, y=y, pch=pch, type='l'))
  with(pts, points(x, y=y, pch=pch))
}

par(pv)
dev.off()
cat("see figures/history.[pdf|eps]\n")

# -----
# function subgroup
#
# Description:
# =====
# Function to do uncorrected tabulation and survival analysis on a sub-group
# of patients in the SUI cohort
#
# Arguments:
# =====
# cohort is a vector of PSEUDO_HESIDs
# label is a string label
# -----
subgroup <- function(cohort, label) {

  event.death.ss <- event.death[event.death$PSEUDO_HESID %in% cohort,]
  event.alive.ss <- event.alive[event.alive$PSEUDO_HESID %in% cohort,]
  event.symptoms.ss <- event.symptoms[event.symptoms$PSEUDO_HESID %in% cohort,]
  event.op.ss <- event.op[event.op$PSEUDO_HESID %in% cohort,]

  cat(length(cohort), "patients in cohort\n")
  cat(nrow(event.death.ss), "died in hospital\n")
  cat(nrow(event.alive.ss), "alive at end of study\n")
  cat(nrow(event.symptoms.ss), "spells due to relevant symptoms\n")
  cat(nrow(event.op.ss), "spells with SUI mesh intervention\n")

  # total time in study
  n.fu <- nrow(event.death.ss)+nrow(event.alive.ss)
  cat(n.fu, "patients in SUI cohort with index procedure\n")
  t.fu <- sum(event.death.ss$time)+sum(event.alive.ss$time)
  cat(t.fu, "total follow-up (days),", t.fu/365.25, "years\n")
  cat(round(t.fu/n.fu, digits=1), "days mean follow-up,",
       round(t.fu/(365.25*n.fu), digits=1), "years\n")
  fu <- c(event.death.ss$time, event.alive.ss$time)

```

```

cat(round(median(fu, na.rm=T), digits=1), "days median follow-up,",
     round(median(fu, na.rm=T)/365.25, digits=1), "years\n")
for (y in 1:8) {
  cat(' ', round(100.0*sum(fu>(y*365.25))/n.fu,2), "% followed up for >", y, "year(s)\n" )
}

# admissions due to relevant symptoms
# -----
cat("\n")
cat("Relevant symptom events:\n")
keep <- c('PSEUDO_HESID', 'time', 'status')
symptoms.all <- rbind(
  event.death.ss[, keep],
  event.alive.ss[, keep],
  event.symptoms.ss[, keep]
)
symptoms.all <- symptoms.all[order(symptoms.all$PSEUDO_HESID, symptoms.all$time),]
cat(' ', nrow(symptoms.all), "total events\n")
cat(' ', length(unique(symptoms.all$PSEUDO_HESID)), "unique patients\n")
cat(' ', sum(symptoms.all$status), "admissions for symptom events\n")
cat(' ', round(sum(symptoms.all$status)/(t.fu/365250.0),2), "per 1000 person years crude IR\n")
cat(' ', length(unique(symptoms.all$PSEUDO_HESID[symptoms.all$status==1])),
     "unique patients\n")
ct <- aggregate(symptoms.all$status, by=list(symptoms.all$PSEUDO_HESID), FUN=sum)
names(ct) <- c("PSEUDO_HESID", "n")
ct <- as.data.frame(table(ct$n))
ct <- cbind(rep(c(' '), nrow(ct)), ct)
names(ct) <- c(' ', 'n', 'freq')
cat(" Distribution of admissions for relevant symptoms:\n")
print(ct, row.names=F)

# tabulate the readmissions for symptoms
cat(" Breakdown of admissions for symptoms:\n")
cat(' ', sum(event.symptoms.ss$Pain), "pain (",
     length(unique(event.symptoms.ss$PSEUDO_HESID[event.symptoms.ss$Pain])),
     "patients)\n")
cat(' ', sum(event.symptoms.ss$Bleeding), "bleeding (",
     length(unique(event.symptoms.ss$PSEUDO_HESID[event.symptoms.ss$Bleeding])),
     "patients)\n")
cat(' ', sum(event.symptoms.ss$Complication), "complication (",
     length(unique(event.symptoms.ss$PSEUDO_HESID[event.symptoms.ss$Complication])),
     "patients)\n")
cat(' ', sum(event.symptoms.ss$Device), "device (",
     length(unique(event.symptoms.ss$PSEUDO_HESID[event.symptoms.ss$Device])),
     "patients)\n")

# admissions including further intervention
# -----
cat("\n")
cat("Further SUI interventions:\n")
keep <- c('PSEUDO_HESID', 'time', 'status')
op.all <- rbind(
  event.death.ss[, keep],
  event.alive.ss[, keep],
  event.op.ss[, keep]
)
op.all <- op.all[order(op.all$PSEUDO_HESID, op.all$time),]
cat(' ', nrow(op.all), "total events\n")
cat(' ', length(unique(op.all$PSEUDO_HESID)), "unique patients\n")
cat(' ', sum(op.all$status), "admissions for reintervention events\n")
cat(' ', round(sum(op.all$status)/(t.fu/365250.0),2), "per 1000 person years crude IR\n")
cat(' ', length(unique(op.all$PSEUDO_HESID[op.all$status==1])),
     "unique patients\n")

```

```

# distribution of re-interventions
# -----
ct <- aggregate(op.all$status, by=list(op.all$PSEUDO_HESID), FUN=sum)
names(ct) <- c("PSEUDO_HESID", "n")
ct <- as.data.frame(table(ct$n))
ct <- cbind(rep(c(' '), nrow(ct)), ct)
names(ct) <- c(' ', 'n', 'freq')
cat("   Distribution of admissions for further mesh interventions:\n")
print(ct, row.names=F)

# type of re-interventions
# -----
cat("   Breakdown of further mesh interventions:\n")
cat(' ', sum(event.op.ss$intro), "introductions (",
    length(unique(event.op.ss$PSEUDO_HESID[event.op.ss$intro])), "patients)\n")

# (specific repairs)
cat("   ", sum(event.op.ss$repair), "repairs (",
    length(unique(event.op.ss$PSEUDO_HESID[event.op.ss$repair])), "patients)\n")

# (removals)
cat("   ", sum(event.op.ss$removal), "removals (",
    length(unique(event.op.ss$PSEUDO_HESID[event.op.ss$removal])), "patients)\n")

# (renewals)
cat("   ", sum(event.op.ss$renewal), "renewals (",
    length(unique(event.op.ss$PSEUDO_HESID[event.op.ss$renewal])), "patients)\n")

# cross-tabulation of symptoms and re-intervention
# -----
cat("\n")
cat("Cross-tabulation of symptoms and re-intervention:\n")
keep <- c('PSEUDO_HESID', 'status')
dup <- duplicated(symptoms.all[, 'PSEUDO_HESID'])
p.first <- symptoms.all[!dup, keep]
names(p.first) <- c('PSEUDO_HESID', 'Symptoms')
dup <- duplicated(op.all[, 'PSEUDO_HESID'])
o.first <- op.all[!dup, keep]
names(o.first) <- c('PSEUDO_HESID', 'Reintervention')
op.first <- merge(x=p.first, y=o.first, by="PSEUDO_HESID", all=T)
ct <- table(Symptoms=op.first$Symptoms, Reop=op.first$Reintervention)
print(ct)

# re-intervention or symptoms event survival analysis
# -----
cat("\n")
cat("Re-intervention or symptoms event analysis:\n")

# combine reinterventions and admissions for symptoms, but only in
# unique spells (so no double counting)
keep <- c('PSEUDO_HESID', 'SPELL', 'time', 'status')
opsym.all <- rbind(
  event.symptoms.ss[,keep],
  event.op.ss[, keep]
)
dup <- duplicated(opsym.all[,c('PSEUDO_HESID', 'SPELL')])
opsym.all <- opsym.all[!dup,]

# add censored details
keep <- c('PSEUDO_HESID', 'time', 'status')
opsym.all <- rbind(
  event.death.ss[, keep],

```

```

event.alive.ss[, keep],
  opsym.all[,keep]
)
opsym.all <- opsym.all[order(opsym.all$PSEUDO_HESID, opsym.all$time),]
cat(' ', sum(opsym.all$status), "admissions for relevant events (in unique spells)\n")
cat(' ', length(unique(opsym.all$PSEUDO_HESID[opsym.all$status==1])), "patients\n")
cat(' ', round(sum(opsym.all$status)/(t.fu/365250.0),2), "per 1000 person years crude IR\n")

# tabulate
ct <- aggregate(opsym.all$status, by=list(opsym.all$PSEUDO_HESID), FUN=sum)
names(ct) <- c("PSEUDO_HESID", "n")
ct <- as.data.frame(table(ct$n))
ct <- cbind(rep(c(' '), nrow(ct)), ct)
names(ct) <- c(' ', 'n', 'freq')
cat(" Distribution of admissions for relevant events:\n")
print(ct, row.names=F)

# hazard function for interventions and symptoms
fit <- muhaz(opsym.all$time, opsym.all$status)
pubfig(file=paste(label, '-hazard-either', sep='', collapse=''))
plot(fit$est.grid/365.25, fit$haz.est*(1000*365.25),
     xlab="Follow-up time (years)",
     ylab="Hazard rate (events/1000 person years)",
     type='l',
     xlim=c(0,8), ylim=c(0,40), las=1)
dev.off()

# first symptoms event survival analysis
# -----
cat("\n")
cat("First relevant symptoms event analysis:\n")

# first event K-M
keep <- c('PSEUDO_HESID')
dup <- duplicated(symptoms.all[, keep])
cat(' ', sum(dup), "events after first event ",
     "(e.g. censor after first admission for relevant symptoms)\n")
symptoms.first <- symptoms.all[!dup,]
cat(' ', nrow(symptoms.first), "first events\n")
cat(' ', length(unique(symptoms.first$PSEUDO_HESID)), "unique patients\n")
cat(' ', sum(symptoms.first$status), "rows with symptom event\n")
cat(' ', nrow(symptoms.first[symptoms.first$time==0,]), "rows with time=0 -> 0.5\n")
cat(' ', nrow(symptoms.first[symptoms.first$time==0 & symptoms.first$status==1,]),
     "events with time=0 -> 0.5\n")
symptoms.first$time[symptoms.first$time==0] <- 0.5 # fix at 0.5 days

# first event survival modelling
surv.first <- with(symptoms.first, Surv(time, status))
km <- survfit(surv.first ~ 1, data=symptoms.first)

# 95% survival times
ci <- quantile(km, probs=c(0.05), conf.int=T)
cat(' ', round(ci$quantile/365.25,2), "(", round(ci$lower/365.25,2), "to",
     round(ci$upper/365.25,2), ") years, 95% survival\n")

# 5 year survival times
s <- summary(km, times=c(365.25*5))
cat(' ', round(s$surv,3), "(", round(s$lower,3), "to", round(s$upper,3),
     ") 5 year survival probability\n")

# Kaplan-Meier and fitted survival curve plot
pubfig(file=paste(label, '-symptoms', sep='', collapse=''))
plot(km,

```

```

mark.time=F,
xscale=365.25,
yscale=100,
ylim=c(90,100),
xlab="Time to first admission for relevant symptoms (years)",
ylab="Proportion symptom free (%)", las=1

# 5y survival
abline(v=5.0*365.25, col='black', lty='dotdash')
abline(h=s$surv, col='black', lty='dotdash')
abline(h=s$lower, col='black', lty='dotdash')
abline(h=s$upper, col='black', lty='dotdash')
dev.off()

# first re-intervention event survival analysis
# -----
cat("\n")
cat("First re-intervention event analysis:\n")

# first event K-M
keep <- c('PSEUDO_HESID')
dup <- duplicated(op.all[, keep])
cat(' ', sum(dup), "events after first event (e.g. censor after re-intervention)\n")
op.first <- op.all[!dup,]
cat(' ', nrow(op.first), "first events\n")
cat(' ', length(unique(op.first$PSEUDO_HESID)), "unique patients\n")
cat(' ', sum(op.first$status), "rows with re-intervention event\n")
cat(' ', nrow(op.first[op.first$time==0,]), "rows with time=0 -> 0.5\n")
cat(' ', nrow(op.first[op.first$time==0 & op.first$status==1,]), "events with time=0 -> 0.5\n")
op.first$time[op.first$time==0] <- 0.5 # fix at 0.5 days

# first event survival modelling
surv.first <- with(op.first, Surv(time, status))
km <- survfit(surv.first ~ 1, data=op.first)

# 95% survival times
ci <- quantile(km, probs=c(0.05), conf.int=T)
cat(' ', round(ci$quantile/365.25,2), "(", round(ci$lower/365.25,2), "to",
  round(ci$upper/365.25,2), ") years, 95% survival\n")

# 5 year survival times
s <- summary(km, times=c(365.25*5))
cat(' ', round(s$surv,3), "(", round(s$lower,3), "to", round(s$upper,3),
  ") 5 year survival probability\n")

# Kaplan-Meier and fitted survival curve plot
pubfig(file=paste(label, '-reop', sep='', collapse=''))
plot(km,
  mark.time=F,
  xscale=365.25,
  yscale=100,
  ylim=c(90,100),
  xlab="Time to first SUI mesh re-intervention (years)",
  ylab="Proportion without re-intervention (%)", las=1)

# 5y survival
abline(v=5.0*365.25, col='black', lty='dotdash')
abline(h=s$surv, col='black', lty='dotdash')
abline(h=s$lower, col='black', lty='dotdash')
abline(h=s$upper, col='black', lty='dotdash')
dev.off()

```



```

# first relevant event survival analysis
# -----
cat("\n")
cat("First relevant event survival analysis:\n")

# first event K-M
keep <- c('PSEUDO_HESID')
dup <- duplicated(opsym.all[, keep])
cat(' ', sum(dup), "events after first event ",
     "(e.g. censor after first symptoms or re-intervention)\n")
opsym.first <- opsym.all[!dup,]
cat(' ', nrow(opsym.first), "first events\n")
cat(' ', length(unique(opsym.first$PSEUDO_HESID)), "unique patients\n")
cat(' ', sum(opsym.first$status), "rows with symptoms or re-intervention event\n")
cat(' ', nrow(opsym.first[opsym.first$time==0,]), "rows with time=0 -> 0.5\n")
cat(' ', nrow(opsym.first[opsym.first$time==0 & opsym.first$status==1,]),
     "events with time=0 -> 0.5\n")
opsym.first$time[opsym.first$time==0] <- 0.5 # fix at 0.5 days

# first event survival modelling
surv.first <- with(opsym.first, Surv(time, status))
km <- survfit(surv.first ~ 1, data=opsym.first)

# 95% survival times
ci <- quantile(km, probs=c(0.05), conf.int=T)
cat(' ', round(ci$quantile/365.25,2), "(", round(ci$lower/365.25,2), "to",
     round(ci$upper/365.25,2), ") years, 95% survival\n")

# 5 year survival times
s <- summary(km, times=c(365.25*5))
cat(' ', round(s$surv,3), "(", round(s$lower,3), "to", round(s$upper,3),
     ") 5 year survival probability\n")

# Kaplan-Meier and fitted survival curve plot
pubfig(file=paste(label, '-either', sep='', collapse=''))
plot(km,
     mark.time=F,
     xscale=365.25,
     yscale=100,
     ylim=c(90,100),
     xlab="Time to first mesh-related re-admission (years)",
     ylab="Proportion without mesh-related re-admission (%)", las=1)

# 5y survival
abline(v=5.0*365.25, col='black', lty='dotted')
abline(h=s$surv, col='black', lty='dotted')
abline(h=s$lower, col='black', lty='dotted')
abline(h=s$upper, col='black', lty='dotted')
dev.off()
}

# -----
# survival analysis unconfounded cohort
# -----
cat("\n")
cat("Unconfounded cohort\n")
cat("-----\n")
cohort <- with(SP.SUI, PSEUDO_HESID[isConfounded==F, drop=T])
subgroup(cohort, "Unconfounded cohort")

# -----
# survival analysis unconfounded TVT, TOT or MS (no combinations)
# -----

```

```

cat("\n")
cat("Unconfounded TVT, TOT or MS\n")
cat("-----\n")
cohort <- with(SP.SUI, PSEUDO_HESID[isConfounded==F & comb==F, drop=T])
subgroup(cohort, "Unconfounded TVT, TOT or MS (no combinations)")

# -----
# survival analysis for TVT unconfounded cohort
# -----
cat("\n")
cat("Unconfounded TVT cohort\n")
cat("-----\n")
cohort <- with(SP.SUI, PSEUDO_HESID[isConfounded==F & TVT==T, drop=T])
subgroup(cohort, "Unconfounded TVT")

# -----
# survival analysis for TOT unconfounded cohort
# -----
cat("\n")
cat("Unconfounded TOT cohort\n")
cat("-----\n")
cohort <- with(SP.SUI, PSEUDO_HESID[isConfounded==F & TOT==T, drop=T])
subgroup(cohort, "Unconfounded TOT")

# -----
# survival analysis for minisling unconfounded cohort
# -----
cat("\n")
cat("Unconfounded minisling cohort\n")
cat("-----\n")
cohort <- with(SP.SUI, PSEUDO_HESID[isConfounded==F & MS==T, drop=T])
subgroup(cohort, "Unconfounded minisling")

# -----
# survival analysis confounded cohort
# -----
cat("\n")
cat("Confounded cohort\n")
cat("-----\n")
cohort <- with(SP.SUI, PSEUDO_HESID[isConfounded==T, drop=T])
subgroup(cohort, "Confounded cohort")

# -----
# survival analysis confounded TVT, TOT or MS (no combinations)
# -----
cat("\n")
cat("Confounded TVT, TOT or MS\n")
cat("-----\n")
cohort <- with(SP.SUI, PSEUDO_HESID[isConfounded==T & comb==F, drop=T])
subgroup(cohort, "Confounded TVT, TOT or MS (no combinations)")

# -----
# survival analysis for TVT confounded cohort
# -----
cat("\n")
cat("Confounded TVT cohort\n")
cat("-----\n")
cohort <- with(SP.SUI, PSEUDO_HESID[isConfounded==T & TVT==T, drop=T])
subgroup(cohort, "Confounded TVT")

# -----
# survival analysis for TOT confounded cohort
# -----

```

```

cat("\n")
cat("Confounded TOT cohort\n")
cat("-----\n")
cohort <- with(SP.SUI, PSEUDO_HESID[isConfounded==T & TOT==T, drop=T])
subgroup(cohort, "Confounded TOT")

# -----
# survival analysis for minisling confounded cohort
# -----
cat("\n")
cat("Confounded minisling cohort\n")
cat("-----\n")
cohort <- with(SP.SUI, PSEUDO_HESID[isConfounded==T & MS==T, drop=T])
subgroup(cohort, "Confounded minisling")

# -----
# clean up
# -----
rm(list=ls())

```

### S5.2.12 safety.R

```

# -----
# safety.R
#
# Description:
# =====
# Analysis of overall safety outcomes, taking account of peri-procedural,
# 30 day and post-procedural outcomes.
#
# History:
# =====
# 21.06.2016. A.J. Sims.
# -----

# clear
rm(list=ls())

# header
cat('\n')
cat('-----\n')
cat('overall safety analysis\n')
cat('-----\n')
cat("\n")

# load intermediate data from each phase
load(file="data/split.Rdata")
load(file='data/thirty.Rdata')
rm(TH)
load(file='data/events.Rdata')
rm(event.alive)
rm(event.death)
rm(event.withpain)

# spells with peri-procedural complications
keep <- c('SPELL', 'PSEUDO_HESID')
spells.peri <- SP.SUI[SP.SUI$hasComplication==T,keep]

# spells with 30 day complication
keep <- c('SPELL', 'PSEUDO_HESID')
spells.30 <- comp.30[,keep]

```

```

# spells with long-term complication
keep <- c('SPELL', 'PSEUDO_HESID')
spells.lt <- rbind(event.op[,keep], event.symptoms[,keep])
dup <- duplicated(spells.lt)
spells.lt <- spells.lt[!dup,]

# print summary
cat(nrow(spells.peri), "spells with peri-procedural complication\n")
cat(nrow(spells.30), "spells with admission within 30 days for complication\n")
cat(nrow(spells.lt), "unique spells with long-term admission for surgery or symptoms\n")

# check for overlaps
spells.peri.30 <- intersect(spells.peri$SPELL, spells.30$SPELL)
cat(length(spells.peri.30), "spells common to peri-procedure and 30 day admissions\n")
spells.30.lt <- intersect(spells.30$SPELL, spells.lt$SPELL)
cat(length(spells.30.lt), "spells common to 30 day admissions and long-term admission\n")
spells.peri.lt <- intersect(spells.peri$SPELL, spells.lt$SPELL)
cat(length(spells.peri.lt), "spells common to peri-procedure and long-term admission\n")
cat("\n")

# details of cohort
keep <- c('PSEUDO_HESID', 'TVT', 'TOT', 'MS', 'comb', 'isConfounded')
cohort <- SP.SUI[,keep]

# note which (if any) event types each patient has suffered
cohort$hasComplication <- cohort$PSEUDO_HESID %in% spells.peri$PSEUDO_HESID
cohort$has30 <- cohort$PSEUDO_HESID %in% spells.30$PSEUDO_HESID
#lt <- unique(intersect(event.op$PSEUDO_HESID, event.symptoms$PSEUDO_HESID))
cohort$hasLT <- cohort$PSEUDO_HESID %in% spells.lt$PSEUDO_HESID
rm(comp.30)
#rm(lt)
rm(event.op)
rm(event.symptoms)

# print summary for a cohort
crosstab <- function(ss) {
  cat(' ', nrow(ss), "patients with first-time mesh insertion\n")
  cat(' ', sum(ss$hasComplication), "with peri-procedural complication\n")
  cat(' ', sum(ss$has30), "with 30 day readmission for complication\n")
  cat(' ', sum(ss$hasLT),
      "with post-procedural admission for device or relevant surgery\n")
  ss$early <- ss$has30 | ss$hasComplication
  cat(' ', sum(ss$early), "with peri-procedural or 30 day complication,",
      round(100*sum(ss$early)/nrow(ss),2), "%\n")
  ss$any <- ss$hasLT | ss$has30 | ss$hasComplication
  cat(' ', sum(ss$any), "with at least one of these,",
      round(100*sum(ss$any)/nrow(ss),2), "%\n")
  ct <- with(ss, table(hasComplication, has30, hasLT))
  #print(ct)
  cat("\n")
}

# unconfounded
cat("Unconfounded cohort:\n")
crosstab(cohort[!cohort$isConfounded,])

cat("Unconfounded TVT:\n")
crosstab(cohort[!cohort$isConfounded & cohort$TVT,])

cat("Unconfounded TOT:\n")
crosstab(cohort[!cohort$isConfounded & cohort$TOT,])

```

```

cat("Unconfounded MS:\n")
crosstab(cohort[!cohort$isConfounded & cohort$MS,])

cat("Confounded cohort:\n")
crosstab(cohort[cohort$isConfounded,])

cat("Confounded TVT:\n")
crosstab(cohort[cohort$isConfounded & cohort$TVT,])

cat("Confounded TOT:\n")
crosstab(cohort[cohort$isConfounded & cohort$TOT,])

cat("Confounded MS:\n")
crosstab(cohort[cohort$isConfounded & cohort$MS,])

cat("Combinations:\n")
crosstab(cohort[cohort$isConfounded & cohort$comb,])

# clear
rm(list=ls())

```

## S5.3 Support functions

### S5.3.1 interventions.R

```

# -----
# interventions.R
#
# Description:
# =====
# Functions to detect code combinations for a mesh intervention. Use
# these as functions to supply with OPERTN lists.
#
# History:
# =====
# 14.06.2016. A.J. Sims. Created.
# -----

# episodes with introductions
int.introduction <- function(codes) {
  if (epimatch(codes, e.codes=quote(M521 | M533 | M536))) {
    supp.codes <- quote(!(Y712 | Y713 | Y716 | Y717 |
                        Y264 | Y265 |
                        Y031 | Y032 | Y033 | Y034 | Y036 | Y037 | Y038 | Y039))
    if (opcs.has.supp(codes, main=c('M521', 'M533', 'M536'), supp=supp.codes, if.none=T)) {
      return(T)
    }
  }
  return(F)
}

# episodes with removals
int.removal <- function(codes) {
  if (epimatch(codes, e.codes=quote(M534 | M535 | M537))) {
    return(T)
  }
  if (epimatch(codes, e.codes=quote(M533 | M536 | M521 | M528 | M538))) {
    supp.codes <- quote(Y037 | Y264)
    if (opcs.has.supp(codes, main=c("M533", "M536", "M521", "M528", "M538"), supp=supp.codes)) {
      return(T)
    }
  }
}

```

```

}
return(F)
}

# episodes with repairs
int.repair <- function(codes) {
  if (epimatch(codes, e.codes=quote(M533 | M536 | M521 | M528 | M538))) {
    supp.codes <- quote(Y031 | Y033 | Y034 | Y036 | Y038 | Y039 |
                        Y265 |
                        Y712 | Y713 | Y716 | Y717)
    if (opcs.has.supp(codes, main=c("M533", "M536", "M521", "M528", "M538"),
                        supp=supp.codes)) {
      return(T)
    }
  }
  return(F)
}

# episodes with renewals
int.renewal <- function(codes) {
  if (epimatch(codes, e.codes=quote(M533 | M536 | M521 | M528 | M538))) {
    supp.codes <- quote(Y032)
    if (opcs.has.supp(codes, main=c("M533", "M536", "M521", "M528", "M538"),
                        supp=supp.codes)) {
      return(T)
    }
  }
  return(F)
}

# POP operations (by main code)
int.pop <- function(codes) {
  pop.codes <- quote(P242 | P245 | P246 | P236 | P237 | Q544 | Q545 | Q546)
  return(epimatch(codes, e.codes=pop.codes))
}

# any SUI mesh
int.ansui <- function(codes) {
  main.codes <- quote(M521 | M533 | M536 |
                    M534 | M535 | M537)
  if (epimatch(codes, e.codes=main.codes)) {
    return(T)
  }
  if (epimatch(codes, e.codes=quote(M528 | M538))) {
    supp.codes <- quote(Y031 | Y033 | Y034 | Y036 | Y037 | Y038 | Y039 |
                      Y264 | Y265 |
                      Y712 | Y713 | Y716 | Y717)
    if (opcs.has.supp(codes, main=c("M528", "M538"), supp=supp.codes)) {
      return(T)
    }
  }
  return(F)
}

# any mesh or tape
int.anymesh <- function(codes) {
  main.codes <- quote(M521 | M533 | M536 |
                    M534 | M535 | M537 |
                    P242 | P245 | P246 | P236 | P237 | Q544 | Q545 | Q546)
  if (epimatch(codes, e.codes=main.codes)) {
    return(T)
  }
  if (epimatch(codes, e.codes=quote(M528 | M538))) {

```

```

supp.codes <- quote(Y031 | Y033 | Y034 | Y036 | Y037 | Y038 | Y039 |
                  Y264 | Y265 |
                  Y712 | Y713 | Y716 | Y717)
if (opcs.has.supp(codes, main=c("M528", "M538"), supp=supp.codes)) {
  return(T)
}
}
return(F)
}

```

### S5.3.2 printcomp.R

```

# -----
# printcomp.R
#
# Description:
# =====
# Prints and summarises complications from a normalised table of complications
# (one per row), with the following fields:
#   SPELL
#   Main Code
#   CompCode
#   SuppCode
#   TOT
#   TVT
#   MS
#   comb
#   isConfounded
#
# Returns updated normalised table with each complication classified by type.
#
# History:
# =====
# 01.06.2016. A.J. Sims. Created from pericomp.R
# -----

source("R/icdSubchapters.R")

printcomp <- function(comp.norm) {

  # add ICD-10 subchapter and descriptions
  comp.norm$ICD <- with(comp.norm, ifelse(is.na(MainCode), CompCode, MainCode))
  comp.norm$subchapter <- sapply(comp.norm$ICD, FUN=icd10.subchapter)
  comp.norm$Description <- sapply(comp.norm$ICD, FUN=icd10.description)

  # complications relating to the procedure, including injuries
  comp.norm$procedure <- apply(comp.norm, 1, FUN=function(row){
    compcodes <- c('T812', 'T817',
                  'T810', 'T811', 'T813', 'T814', 'T815', 'T816', 'T818', 'T819')

    maincodes <- c('S345', 'S346', 'S348', 'S357', 'S358', 'S359',
                  'S365', 'S367', 'S368', 'S369',
                  'S370', 'S371', 'S372', 'S373', 'S377', 'S378', 'S379',
                  'S390', 'S396', 'S397', 'S398', 'S399')

    suppcodes <- c('Y600', 'Y608')
    nbv <- F
    if (any(compcodes %in% row['CompCode'])) {
      nbv <- T
    }
  })
  if (any(maincodes %in% row['MainCode']) & any(suppcodes %in% row['SuppCode'])) {

```

```

    nbv <- T
  }
  return(nbv)
})

# complications of devices, implants and grafts
comp.norm$device <- apply(comp.norm, 1, FUN=function(row){
  compcodes <- c('T831', 'T834', 'T835', 'T836', 'T837', 'T838', 'T839',
                'T856', 'T857', 'T858', 'T859')
  mainsections <- c('R30', 'R31', 'R32', 'R33', 'R34', 'R35', 'R36', 'R37', 'R38', 'R39')
  suppcodes <- c('Y732', 'Y733', 'Y831')
  dig <- F
  if (any(compcodes %in% row['CompCode'])) {
    dig <- T
  }
  if (any(suppcodes %in% row['SuppCode']) &
      # if main code is NOT in chapters R30-R39
      !(row['MainCode'] %inSections% mainsections)) {
    dig <- T
  }
  return(dig)
})

# complications involving urinary symptoms arising from the procedure
comp.norm$uri <- apply(comp.norm, 1, FUN=function(row){
  mainsections <- c('R30', 'R31', 'R32', 'R33', 'R34', 'R35', 'R36', 'R37', 'R38', 'R39')
  compcodes <- c('N998', 'N999')
  uri <- F
  if (row['MainCode'] %inSections% mainsections) {
    uri <- T
  }
  if (any(compcodes %in% row['CompCode'])) {
    uri <- T
  }
  return(uri)
})

# -----
# complications in unconfounded operations
# -----

cat('\n')
cat("Complications in unconfounded operations\n")
cat("-----\n")

cat("All reported complications:\n")
ss <- comp.norm[comp.norm$isConfounded==F,]
cat(' ', sum(ss$TVT), "TVT\n")
cat(' ', sum(ss$TOT), "TOT\n")
cat(' ', sum(ss$MS), "MS\n")
cat(' ', sum(ss$comb), "comb\n")
cat("\n")

cat("Complication code (no supplementary code):\n")
ss <- comp.norm[comp.norm$isConfounded==F & is.na(comp.norm$SuppCode),]
if (nrow(ss) > 0) {
  ct <- with(ss, {aggregate(cbind(TVT, TOT, MS, comb),
                          by=list(substr(CompCode, 1, 3)), FUN=sum)})
  if (nrow(ct)>0) {
    names(ct) <- c("CompCode", "TVT", "TOT", "MS", "comb")
    print(ct, row.names=F)
  }
}
}

```



```

cat("\n")

cat("Complication code (with supplementary code):\n")
ss <- comp.norm[comp.norm$IsConfounded==F & !is.na(comp.norm$SuppCode),]
if (nrow(ss) > 0) {
  ct <- with(ss, {aggregate(cbind(TVT, TOT, MS, comb),
                           by=list(substr(CompCode, 1, 3)), FUN=sum)})

  if (nrow(ct) > 0) {
    names(ct) <- c("CompCode", "TVT", "TOT", "MS", "comb")
    print(ct, row.names=F)
  }
}
cat("\n")

cat("By main diagnosis code (with supplementary code):\n")
ss <- comp.norm[comp.norm$IsConfounded==F,]
if (nrow(ss) > 0) {
  ct <- with(ss, {
    aggregate(cbind(TVT, TOT, MS, comb),
              by=list(substr(MainCode, 1, 3)), FUN=sum)
  })
  if (nrow(ct) > 0) {
    names(ct) <- c("MainCode", "TVT", "TOT", "MS", "comb")
    print(ct, row.names=F)
  }
}
cat("\n")

cat("By supplementary code:\n")
ss <- comp.norm[comp.norm$IsConfounded==F,]
if (nrow(ss) > 0) {
  ct <- with(ss, {
    aggregate(cbind(TVT, TOT, MS, comb),
              by=list(substr(SuppCode, 1, 3)), FUN=sum)
  })
  if (nrow(ct) > 0) {
    names(ct) <- c("SuppCode", "TVT", "TOT", "MS", "comb")
    print(ct, row.names=F)
  }
}
cat("\n")

cat("By type of complication:\n")
ss <- comp.norm[comp.norm$IsConfounded==F,]
nsp <- length(unique(ss$SPELL[ss$procedure==T]))
cat(' ', nsp, "spells with procedure complication (", sum(ss$procedure),
    "complications)\n")
cat(' ', length(unique(ss$SPELL[ss$procedure==T & ss$TVT==T])),
    'TVT\n')
cat(' ', length(unique(ss$SPELL[ss$procedure==T & ss$TOT==T])),
    'TOT\n')
cat(' ', length(unique(ss$SPELL[ss$procedure==T & ss$MS==T])),
    'MS\n')
cat(' ', length(unique(ss$SPELL[ss$procedure==T & ss$comb==T])),
    'combinations\n')
nsp <- length(unique(ss$SPELL[ss$device==T]))
cat(' ', nsp, "spells with device complication (", sum(ss$device),
    "complications)\n")
cat(' ', length(unique(ss$SPELL[ss$device==T & ss$TVT==T])),
    'TVT\n')
cat(' ', length(unique(ss$SPELL[ss$device==T & ss$TOT==T])),
    'TOT\n')
cat(' ', length(unique(ss$SPELL[ss$device==T & ss$MS==T])),

```

```

      'MS\n')
cat('      ', length(unique(ss$SPELL[ss$device==T & ss$comb==T])),
    'combinations\n')
nsp <- length(unique(ss$SPELL[ss$uri==T]))
cat('      ', nsp, "spells with complication with urinary symptoms (", sum(ss$uri),
    "complications)\n")
cat('      ', length(unique(ss$SPELL[ss$uri==T & ss$TVT==T])),
    'TVT\n')
cat('      ', length(unique(ss$SPELL[ss$uri==T & ss$TOT==T])),
    'TOT\n')
cat('      ', length(unique(ss$SPELL[ss$uri==T & ss$MS==T])),
    'MS\n')
cat('      ', length(unique(ss$SPELL[ss$uri==T & ss$comb==T])),
    'combinations\n')
nsp <- length(unique(ss$SPELL[ss$procedure==F & ss$device==F & ss$uri==F]))
cat('      ', nsp, "spells with other complication\n")
cat('      ',
    length(unique(ss$SPELL[ss$procedure==F & ss$device==F & ss$uri==F & ss$TVT==T])),
    'TVT\n')
cat('      ',
    length(unique(ss$SPELL[ss$procedure==F & ss$device==F & ss$uri==F & ss$TOT==T])),
    'TOT\n')
cat('      ',
    length(unique(ss$SPELL[ss$procedure==F & ss$device==F & ss$uri==F & ss$MS==T])),
    'MS\n')
cat('      ',
    length(unique(ss$SPELL[ss$procedure==F & ss$device==F & ss$uri==F & ss$comb==T])),
    'combinations\n')
cat('\n')

cat("Most common complications:\n")

cat("  Complication code (with or without supplementary code):\n")
ss <- comp.norm[comp.norm$isConfounded==F,]
ct <- with(ss, {aggregate(cbind(TVT, TOT, MS),
                        by=list(substr(CompCode, 1, 3)), FUN=sum)})
if (nrow(ct)>0) {
  names(ct) <- c("CompCode", "TVT", "TOT", "MS")
}
ct$sum <- rowSums(ct[,c("TVT", "TOT", "MS")])
ct <- ct[order(ct$sum, decreasing=T),]
print(ct, row.names=F)
cat("\n")

cat("  Main code (with supplementary code):\n")
ss <- comp.norm[comp.norm$isConfounded==F,]
ct <- with(ss, {aggregate(cbind(TVT, TOT, MS),
                        by=list(substr(MainCode, 1, 3)), FUN=sum)})
if (nrow(ct)>0) {
  names(ct) <- c("MainCode", "TVT", "TOT", "MS")
}
ct$sum <- rowSums(ct[,c("TVT", "TOT", "MS")])
ct <- ct[order(ct$sum, decreasing=T),]
print(ct, row.names=F)
cat("\n")

cat("  Complication code (with or without supplementary code) in 'other' group:\n")
ss <- comp.norm[comp.norm$isConfounded==F & comp.norm$procedure==F &
                comp.norm$device==F & comp.norm$uri==F,]
ct <- with(ss, {aggregate(cbind(TVT, TOT, MS),
                        by=list(substr(CompCode, 1, 3)), FUN=sum)})
if (nrow(ct)>0) {
  names(ct) <- c("CompCode", "TVT", "TOT", "MS")
}

```

```

}
ct$sum <- rowSums(ct[,c("TVT", "TOT", "MS")])
ct <- ct[order(ct$sum, decreasing=T),]
print(ct, row.names=F)
cat("\n")

cat(" Main code (with supplementary code) in 'other' group:\n")
ss <- comp.norm[comp.norm$isConfounded==F & comp.norm$procedure==F &
                comp.norm$device==F & comp.norm$uri==F,]
ct <- with(ss, {aggregate(cbind(TVT, TOT, MS),
                          by=list(substr(MainCode, 1, 3)), FUN=sum)})
if (nrow(ct)>0) {
  names(ct) <- c("MainCode", "TVT", "TOT", "MS")
}
ct$sum <- rowSums(ct[,c("TVT", "TOT", "MS")])
ct <- ct[order(ct$sum, decreasing=T),]
print(ct, row.names=F)
cat("\n")

# -----
# complications in confounded operations
# -----

cat("Complications in confounded operations\n")
cat("-----\n")

cat("All reported complications:\n")
ss <- comp.norm[comp.norm$isConfounded==T,]
cat(' ', sum(ss$TVT), "TVT\n")
cat(' ', sum(ss$TOT), "TOT\n")
cat(' ', sum(ss$MS), "MS\n")
cat(' ', sum(ss$comb), "comb\n")
cat("\n")

cat("Complication code (no supplementary code):\n")
ss <- comp.norm[comp.norm$isConfounded==T & is.na(comp.norm$SuppCode),]
if (nrow(ss) > 0) {
  ct <- with(ss, {aggregate(cbind(TVT, TOT, MS, comb),
                            by=list(substr(CompCode, 1, 3)), FUN=sum)})

  if (nrow(ct)>0) {
    names(ct) <- c("CompCode", "TVT", "TOT", "MS", "comb")
    print(ct, row.names=F)
  }
}
cat("\n")

cat("Complication code (with supplementary code):\n")
ss <- comp.norm[comp.norm$isConfounded==T & !is.na(comp.norm$SuppCode),]
if (nrow(ss) > 0) {
  ct <- with(ss, {aggregate(cbind(TVT, TOT, MS, comb),
                            by=list(substr(CompCode, 1, 3)), FUN=sum)})

  if (nrow(ct) > 0) {
    names(ct) <- c("CompCode", "TVT", "TOT", "MS", "comb")
    print(ct, row.names=F)
  }
}
cat("\n")

cat("By main diagnosis code (with supplementary code):\n")
ss <- comp.norm[comp.norm$isConfounded==T,]
if (nrow(ss) > 0) {
  ct <- with(ss, {

```

```

    aggregate(cbind(TVT, TOT, MS, comb),
              by=list(substr(MainCode, 1, 3)), FUN=sum)
  })
  if (nrow(ct) > 0) {
    names(ct) <- c("MainCode", "TVT", "TOT", "MS", "comb")
    print(ct, row.names=F)
  }
}
cat("\n")

cat("By supplementary code:\n")
ss <- comp.norm[comp.norm$isConfounded==T,]
if (nrow(ss) > 0) {
  ct <- with(ss, {
    aggregate(cbind(TVT, TOT, MS, comb), by=list(substr(SuppCode, 1, 3)), FUN=sum)
  })
  if (nrow(ct) > 0) {
    names(ct) <- c("SuppCode", "TVT", "TOT", "MS", "comb")
    print(ct, row.names=F)
  }
}
cat("\n")

cat("By type of complication:\n")
ss <- comp.norm[comp.norm$isConfounded==T,]
nsp <- length(unique(ss$SPELL[ss$procedure==T]))
cat(' ', nsp, "spells with procedure complication (", sum(ss$procedure),
    "complications)\n")
cat(' ', length(unique(ss$SPELL[ss$procedure==T & ss$TVT==T])),
    'TVT\n')

cat(' ', length(unique(ss$SPELL[ss$procedure==T & ss$TOT==T])), 'TOT\n')
cat(' ', length(unique(ss$SPELL[ss$procedure==T & ss$MS==T])),
    'MS\n')
cat(' ', length(unique(ss$SPELL[ss$procedure==T & ss$comb==T])),
    'combinations\n')
nsp <- length(unique(ss$SPELL[ss$device==T]))
cat(' ', nsp, "spells with device complication (", sum(ss$device),
    "complications)\n")
cat(' ', length(unique(ss$SPELL[ss$device==T & ss$TVT==T])),
    'TVT\n')
cat(' ', length(unique(ss$SPELL[ss$device==T & ss$TOT==T])),
    'TOT\n')
cat(' ', length(unique(ss$SPELL[ss$device==T & ss$MS==T])),
    'MS\n')
cat(' ', length(unique(ss$SPELL[ss$device==T & ss$comb==T])),
    'combinations\n')
nsp <- length(unique(ss$SPELL[ss$uri==T]))
cat(' ', nsp, "spells with complication with urinary symptoms (", sum(ss$uri),
    "complications)\n")
cat(' ', length(unique(ss$SPELL[ss$uri==T & ss$TVT==T])),
    'TVT\n')
cat(' ', length(unique(ss$SPELL[ss$uri==T & ss$TOT==T])),
    'TOT\n')
cat(' ', length(unique(ss$SPELL[ss$uri==T & ss$MS==T])),
    'MS\n')
cat(' ', length(unique(ss$SPELL[ss$uri==T & ss$comb==T])),
    'combinations\n')
nsp <- length(unique(ss$SPELL[ss$procedure==F & ss$device==F & ss$uri==F]))
cat(' ', nsp, "spells with other complication\n")
cat(' ',
    length(unique(ss$SPELL[ss$procedure==F & ss$device==F & ss$uri==F & ss$TVT==T])),
    'TVT\n')

```

```

cat('      ',
     length(unique(ss$SPELL[ss$procedure==F & ss$device==F & ss$uri==F & ss$TOT==T])),
     'TOT\n')
cat('      ',
     length(unique(ss$SPELL[ss$procedure==F & ss$device==F & ss$uri==F & ss$MS==T])),
     'MS\n')
cat('      ',
     length(unique(ss$SPELL[ss$procedure==F & ss$device==F & ss$uri==F & ss$comb==T])),
     'combinations\n')
cat('\n')

cat("Most common complications:\n")

cat("  Complication code (with or without supplementary code):\n")
ss <- comp.norm[comp.norm$isConfounded==T,]
ct <- with(ss, {aggregate(cbind(TVT, TOT, MS), by=list(substr(CompCode, 1, 3)), FUN=sum)})
if (nrow(ct)>0) {
  names(ct) <- c("CompCode", "TVT", "TOT", "MS")
}
ct$sum <- rowSums(ct[,c("TVT", "TOT", "MS")])
ct <- ct[order(ct$sum, decreasing=T),]
print(ct, row.names=F)
cat("\n")

cat("  Main code (with supplementary code):\n")
ss <- comp.norm[comp.norm$isConfounded==T,]
ct <- with(ss, {aggregate(cbind(TVT, TOT, MS), by=list(substr(MainCode, 1, 3)), FUN=sum)})
if (nrow(ct)>0) {
  names(ct) <- c("MainCode", "TVT", "TOT", "MS")
}
ct$sum <- rowSums(ct[,c("TVT", "TOT", "MS")])
ct <- ct[order(ct$sum, decreasing=T),]
print(ct, row.names=F)
cat("\n")

# return updated normalised complication table
return(comp.norm)
}

```

### S5.3.3 pubfig.R

```

pubfig <- function(file) {

# -----
# Description:
# -----
# opens graphics output to create publication quality figure. Edit this
# file to set appropriate options according to journal requirements.
# Places figures in /figure folder.
#
# History:
# -----
# 21.02.2017. A.J. Sims. Created.
# -----

# PLOS ONE pdf (for Supporting figures)
pdf(file=paste('figure/', file, '.pdf', sep=''), width=5.2, height=5.2,
     pointsize=12*5.2/7.0)

# PLOS ONE encapsulated postscript
#postscript(file=paste('figure/', file, '.eps', sep=''),

```

```

#         onefile=F, horizontal=F, paper="special",
#         width=5.2, height=5.2, pointsize=12*5.2/7.0)
}

```

### S5.3.4 epimatch.R

```

epimatch <- function(r, e.codes) {

# -----
# Description:
# =====
# Matching function for HES episodes. Use in conjunction with sapply function
# on lists of lists. Arguments as follows:
#   r       : a list of procedure or diagnostic codes
#   e.codes: a boolean combination of (4 character) procedure codes, as an
#             expression. For example quote((P236 & P237) | P231) will
#             match episodes that include both P236 and P237, or P231.
#             quote(P236 & !P237) will match episodes that include P236 excluding
#             those that also contain P237.
#
# The technique works as follows. Argument e.codes is treated as an R
# expression. When it parses the expression, R treats the codes (P123 etc)
# as variables. Function 'all.vars' returns the (unique) variables in the
# expression. This function then replaces (using substitute) each
# variable (i.e. code) with an expression that searches for that particular
# code in the list of codes. Because of the way that the expression allows
# different searches to be combined, each code must be searched separately.
#
# History:
# =====
# 07.05.2014. A.J. Sims. Created.
# 08.05.2014. K.K.      Modified have already restricted to procedure fields in
#                       main code, no need to repeat, substituted 'sub' with
#                       'gsub' function
# 14.05.2014. A.J. Sims. Change above means that all fields in 'row' will be
#                       searched. If this is to be restricted to operation fields
#                       then only those columns of a data frame should be sent to
#                       the apply function. This function will also work for
#                       diagnostic codes if only those fields are provided. The
#                       argument name (e.codes) has been changed to reflect that.
# 14.05.2014. A.J. Sims. The %in% operator, used to search for the occurrence of
#                       a (single) particular code in the list of all codes
#                       supplied can be replaced by 'pmatch' if allow.partial
#                       is set TRUE. This allows partial matching, e.g. 'P23' will
#                       match 'P231', 'P232' etc.
# 18.08.2015. A.J.Sims. Replaced use of parse() with direct substitution into
#                       an expression. e.codes should be passed in as an
#                       expression, e.g. quote((P236 & P237) | P231) and
#                       argument allow.partial has been removed. Improves
#                       performance and safety. Note recursive use of
#                       substitute() to allow lexical editing of an
#                       expression stored in a variable rather than a literal.
# -----

# -----
# construct and apply a boolean match expression for all procedures...
# -----

# build a paired list of variables to substitute (one for each in the
# call expression)

```

```

sublist <- list()

# template expression for each variable in e.codes (X is substituted with
# each of the variables in the calling logical expression)
template <- quote((c(X) %in% r))

# focus on only the variables from the text expression and search for each in array
for (v in all.vars(e.codes)) {
  rep <- eval(substitute(substitute(e, list(X=v)), list(e=template)))
  sublist[[v]] <- rep
}
expr <- eval(substitute(substitute(e, env=sublist), env=list(e=e.codes)))

return(eval(expr))
}

```

### S5.3.5 icdsplit.R

```

icdsplit <- function(codes) {

# -----
# Description:
# =====
# Separates a list of ICD-10 codes into a sequence (list) of lists,
# with each element of the sequence starting with a main code.
# Needed due to the presence of supplementary codes in Chapter XX
# of ICD-10 (range V01 to Y98). Works by detecting main codes
# (as logical NOT of supplementary codes), uses cumsum
# to generate a sequence of chunk labels the same length as the
# code sequence, e.g. 1123334556 etc, then split.
#
# History:
# =====
# 11.08.2015. A.J. Sims. Created.
#
# Arguments:
# =====
# 'codes' is a list of ICD-10 codes in HES order; it consists of
# a sequence of main codes, each followed by zero or more
# supplementary codes.
#
# Value:
# =====
# A list of lists of ICD-10 code sequences, with each low level list
# starting with a main code and followed by supplementary codes. Many
# of the low level lists will have only one entry.
# -----

# find indices of supplementary codes (anything in chapters V, W, X, Y)
table <- c("V", "W", "X", "Y")
mask <- cumsum(!(substr(codes,1,1) %in% table)) # 11122345567 etc
return(split(codes,mask))
}

```

### S5.3.6 icdSubchapters.R

```

# -----
# icdSubchapters.R
#

```

```

# Description:
# =====
# Reads subchapter names into a data frame, and offers a lookup
# function to search them with a given code.
#
# History:
# =====
# 11.12.2015. A.J. Sims. Created from Sam Urwin's file.
# -----

# read sub-chapter names into a data frame (will be executed when R file
# is loaded with "source")

ICD10.subchapters <- read.csv2(header=T, stringsAsFactors=F, text=[14719 chars quoted with '''])
ICD10.subchapters <- ICD10.subchapters[order(ICD10.subchapters$Start),]

# function to return sub chapter name, based on code
icd10.subchapter <- function(code) {
  if (is.na(code)) {return(NA)}
  code <- gsub("X$", '', code) # remove
  lvs <- (ICD10.subchapters$Start <= code)
  lve <- (ICD10.subchapters$End >= code)
  index <- intersect(which(lvs), which(lve))
  return(paste(ICD10.subchapters$Start[index], "-", ICD10.subchapters$End[index]))
}

icd10.description <- function(code) {
  if (is.na(code)) {return(NA)}
  code <- gsub("X$", '', code) # remove
  lvs <- (ICD10.subchapters$Start <= code)
  lve <- (ICD10.subchapters$End >= code)
  index <- intersect(which(lvs), which(lve))
  return(ICD10.subchapters$Description[index])
}

```

### S5.3.7 inChapters.R

```

# -----
# inChapters.R
#
# Description:
# =====
# Function to test which of a vector of (3 digit) codes match
# to a list of chapters.
#
# History:
# =====
# 01.05.2015. A.J. Sims. Created.
# 19.08.2015. A.J. Sims. Now returns logical vector (like %in%).
# -----

#' @title Chapter match
#'
#' Match OPCS-4 or ICD-10 3 letter codes to chapters
#'
#' @param codes vector of 3-character codes to be matched
#' @param table vector of chapters to be matched against.
#'
#' @return A logical vector of the same length as x.
#'
#' @export

```



```

"%inChapters%" <- function(codes, table) {
  # convert codes to single (first) letter
  mat <- match(substr(codes,1,1), table, nomatch=0)
  return(mat != 0)
}

```

### S5.3.8 inSections.R

```

# -----
# inSections.R
#
# Description:
# =====
# Function to test which of a vector of (3 digit) codes match
# to a list of sections, e.g. (A01, P23).
#
# History:
# =====
# 01.05.2015. A.J. Sims. Created.
# 19.08.2015. A.J. Sims. Now returns logical vector (like %in%).
# -----

#' @title DPCS-4/ICD-10 section match
#'
#' Match DPCS-4 or ICD-10 3 letter codes to sections
#'
#' @param codes vector of 3-character codes to be matched
#' @param table vector of sections to be matched against.
#'
#' @return A logical vector of the same length as x.
#'
#' @export
"%inSections%" <- function(codes, table) {
  # convert codes to first 3 characters
  mat <- match(substr(codes,1,3), table, nomatch=0)
  return(mat != 0)
}

```

### S5.3.9 is\_complication.R

```

# -----
# is_complication.R
#
# Description:
# =====
# Identify episodes with in-episode complications from any code sequence
# where the code sequence (argument 'chunk') is a list of codes starting
# with a main ICD-10 code and followed by zero or more supplementary codes.
#
# Returns a list of:
# complication code (if applicable)
# main code (if followed by a Y code)
# supp code the first supplementary qualifier code.
#
#
# Arguments:
# =====

```

```

# chunk:      a list of ICD-10 codes following chunk rules (i.e. starts
#             with a code from chapter A-U or Z, followed by zero or more
#             supplementary codes from chapters V, W, X, Y).
#
# History:
# =====
# 18.08.2015. A.J. Sims. Created from Sam Urwin & Kim Keltie's original
#             based on individual codes.
# 11.09.2015. A.J. Sims. Returns main diagnosis codes, complication code
#             (in main field) and supplementary code.
# 27.05.2016. A.J. Sims. Defined post-procedure codes now listed as post.codes.
# -----

is.complication <- function(chunk) {

  # List of T80-T88 complication codes...
  T.sections <- c(# Complications following infusion, transfusion and therapeutic injection
    'T80',
    # Complication of procedures NEC
    'T81',
    # Complications of cardiac & vascular prosthetics
    'T82',
    # Complications of genitourinary prosthetic devices, implants and grafts
    'T83',
    # Complications of internal orthopaedic prosthetic devices, implants and grafts
    'T84',
    # Complications of other internal prosthetic devices, implants and grafts
    'T85',
    # Failure and rejection of transplanted organs and tissues
    'T86',
    # Complications peculiar to reattachment and amputation
    'T87',
    # Other complications of surgical & med care NEC
    'T88')

  # List of Y complication codes...
  Y.sections <- c(
    # Drug adverse events
    'Y40',
    'Y41',
    'Y42',
    'Y43',
    'Y44',
    'Y45',
    'Y46',
    'Y47',
    'Y48',
    'Y49',
    'Y50',
    'Y51',
    'Y52',
    'Y53',
    'Y54',
    'Y55',
    'Y56',
    'Y57',
    'Y58',
    'Y59',
    # Unintentional cut, puncture, perforation or haemorrhage during surgical and medical care
    'Y60',
    # Foreign object accidentally left in body during surgical and medical care
    'Y61',
    # Failure of sterile precautions during surgical and medical care

```

```

'Y62',
# Failure in dosage during surgical and medical care
'Y63',
# Contaminated medical or biological substances
'Y64',
# Other misadventures during surgical and medical care
'Y65',
# Nonadministration of surgical and medical care
'Y66',
# Unspecified misadventure during surgical and medical care
'Y69',
# Anaesthesiology devices associated with adverse incidents
'Y70',
# Cardiovascular devices associated with adverse incidents
'Y71',
# Otorhinolaryngological devices associated with adverse incidents
'Y72',
# Gastroenterology and urology devices associated with adverse incidents
'Y73',
# General hospital and personal-use devices associated with adverse incidents
'Y74',
# Neurological devices associated with adverse incidents
'Y75',
# Obstetric and gynaecological devices associated with adverse incidents
'Y76',
# Ophthalmic devices associated with adverse incidents
'Y77',
# Radiological devices associated with adverse incidents
'Y78',
# Orthopaedic devices associated with adverse events
'Y79',
# Physical medicine devices associated with adverse incidents
'Y80',
# General and plastic surgical devices associated with adverse incidents
'Y81',
# Other and unspecified medical devices associated with adverse incidents
'Y82',
# Surgical operation and other surgical procedures as the cause of abnormal
# reaction of the patient, or of later complication, without mention of
# misadventure at the time of the procedure
'Y83',
# Other medical procedures as the cause of abnormal reaction of the patient,
# or of later complication, without mention of misadventure at the time of the procedure
'Y84')

# post-procedure complication codes (n.b. context specific)
post.codes <- c(
  'G970', 'G971', 'G978', 'G979',
  'I978', 'I979',
  'J950', 'J952', 'J953', 'J954', 'J955', 'J956', 'J957', 'J958', 'J959',
  'K914', 'K918', 'K919',
  'M968', 'M969',
  'N990', 'N991', 'N992', 'N994', 'N995', 'N996', 'N998', 'N999'
)

# set output
main <- NA
comp <- NA
supp <- NA

# 'T' or 'other' as main code
if ((chunk[1] %in% T.sections) | (chunk[1] %in% post.codes)) {
  comp <- chunk[1]
}

```

```

}

# 'Y' in supplementary codes
nc <- length(chunk)
if (nc > 1) {
  ndx <- which(chunk %inSections% Y.sections) # no need to start at 2 because 1 is not Y.
  if (length(ndx) > 0) {
    supp <- chunk[ndx[1]] # the first qualifying Y code
    if (is.na(comp)) {
      main <- chunk[1]
    }
  }
}
}
return(c(MainCode=main, CompCode=comp, SuppCode=supp))
}

```

### S5.3.10 opcs\_has\_supp.R

```

# -----
# opcs_has_supp.R
#
# Description:
# =====
# Takes a list of OPCS supplementary codes and checks whether the specified
# main code is followed by a supplementary code.
#
# Arguments:
# =====
# codes: A list of OPCS codes in HES order
# main: Main codes of interest (must be in 'codes') - a list.
# supp: A quote expression of candidate supplementary codes (in
# 'epimatch' syntax, e.g. (Y123 | Y124) & Y111.
# if.none Response to return if there are no supplementary codes following
# the main code. Normally (and by default) FALSE, because in most
# cases the 'supp' expression will be looking for the presence of
# one or more supplementary codes. But if 'supp' is a list of
# codes not wanted, eg !(Y123 | Y456), then set if.none=T because
# the main code on its own qualifies.
#
# Value:
# =====
# Logical.
#
# History:
# =====
# 17.09.2015. A.J. Sims. Created.
# 05.12.2015. A.J. Sims. Added if.none argument and changed logic in test.
# 14.06.2016. A.J. Sims. Allowed main to be a list of matching codes.
# -----

opcs.has.supp <- function(codes, main, supp, if.none=F) {

  # split into chunks and test each one
  chunks <- opcssplit(codes)
  has.supp <- sapply(chunks, FUN=function(chunk) {
    rc <- F
    if (chunk[1] %in% main) {
      nc <- length(chunk)
      if (nc==1) {return(if.none)} # there are no supplementary codes
      rc <- epimatch(chunk[2:nc], e.codes=supp)
    }
  })
}

```

```

    return(rc)
  })
  return(any(has.sup))
}

```

### S5.3.11 opcssplit.R

```

opcssplit <- function(codes) {
  # -----
  # Description:
  # =====
  # Separates a list of OPCS-4 codes into a sequence (list) of lists,
  # with each element of the sequence starting with a main code.
  # Needed due to the presence of supplementary codes in OPCS-4.
  # Works by detecting main codes
  # (as logical NOT of supplementary codes), uses cumsum
  # to generate a sequence of chunk labels the same length as the
  # code sequence, e.g. 1123334556 etc, then split.
  #
  # History:
  # =====
  # 11.08.2015. A.J. Sims. Created.
  # 12.05.2016. A.J. Sims. Added 0 chapter as supplementary codes.
  #
  # Arguments:
  # =====
  # 'codes' is a list of OPCS-4 codes in HES order; it consists of
  # a sequence of main codes, each followed by zero or more
  # supplementary codes.
  #
  # Value:
  # =====
  # A list of lists of OPCS-4 code sequences, with each low level list
  # starting with a main code and followed by supplementary codes. Many
  # of the low level lists will have only one entry.
  # -----

  # find indices of subsidiary codes (anything in chapters Y or Z)
  table <- c("0", "Y", "Z")
  # these should also match (chapter '0' codes used as overspill)
  # 011      Other upper digestive tract
  # 012      Branch of external carotid artery
  # 013      Other leg region
  # 014      Other lymph node
  # 016      Body region
  # 028      Other cerebral artery
  # 030      Other large intestine
  # 031      Other arm region
  # 033      Bone of skull

  mask <- cumsum(!(substr(codes,1,1) %in% table)) # 11122345567 etc
  return(split(codes,mask))
}

```

## Supplementary File S6: Output from analysis

2016-07-14 18:03:47

R version 3.3.1 (2016-06-21)

HES extract

-----

SQL table: 20151126\_RX029\_MESH\_0708\_1415\_M533M536M521\_allep

564464 rows in table 20151126\_RX029\_MESH\_0708\_1415\_M533M536M521\_allep

Raw data

-----

564463 episodes

101081 patients

Checks on data:

-----

ADMIDATE range: 2005-06-22 2015-03-31

DISDATE range: 2007-04-01 2015-03-31

EPIEND range: 2007-04-01 2015-03-31

EPISTART range: 2005-10-25 2015-03-31

FYEAR values: [1] 0708 0809 0910 1011 1112 1213 1314 1415

Levels: 0708 0809 0910 1011 1112 1213 1314 1415

ADMIMETH values: [1] 28 21 11 22 24 13 32 31 12 81 99 23 82 83 98 2D 25 2A 2B 2C

Levels: 11 12 13 21 22 23 24 25 28 2A 2B 2C 2D 31 32 81 82 83 98 99

DISDEST values: [1] 19 98 51 79 52 50 85 99 53 29 49 38 87 65 88 54 84 37 48 30 66 NA

DISMETH values:[1] 1 8 2 4 9 3 NA

SEX values:[1] 2 1 0 9

STARTAGE range: 0 102

120377 bad OPERTN codes out of 564463 episodes

code freq

- 120209

- 8

& 84

& 76

0 bad DIAG codes out of 564463 episodes

Bad ICD-10 codes:

SUI cohort

-----

103707 episodes containing M533 | M536 | M521

101081 patients

564463 episodes for these patients

POP cohort

-----

2933 episodes containing P236 | P237 | P242 | P245 | P246 | Q544 | Q545 | Q546

2743 patients

20183 episodes for these patients

Raw data

-----

564463 episodes

101081 patients

Activity - incontinence

-----

63576 episodes with M533

8820 in 0708

8507 in 0809

8397 in 0910

8096 in 1011

8174 in 1112

7628 in 1213

7612 in 1314

6342 in 1415

38997 episodes with M536

5100 in 0708

5752 in 0809

5571 in 0910

5435 in 1011  
 4887 in 1112  
 4485 in 1213  
 4366 in 1314  
 3401 in 1415  
 1225 episodes with M521  
   211 in 0708  
   152 in 0809  
   142 in 0910  
   130 in 1011  
   135 in 1112  
   136 in 1213  
   179 in 1314  
   140 in 1415  
 899 episodes with M534  
   66 in 0708  
   104 in 0809  
   100 in 0910  
   121 in 1011  
   130 in 1112  
   124 in 1213  
   124 in 1314  
   130 in 1415  
 1868 episodes with M535  
   110 in 0708  
   214 in 0809  
   207 in 0910  
   233 in 1011  
   266 in 1112  
   301 in 1213  
   267 in 1314  
   270 in 1415  
 49 episodes with M533 & (Y037 | Y264)  
   3 in 0708  
   4 in 0809  
   8 in 0910  
   16 in 1011  
   8 in 1112  
   3 in 1213  
   3 in 1314  
   4 in 1415  
 607 episodes with M537  
   31 in 0708  
   65 in 0809  
   96 in 0910  
   81 in 1011  
   72 in 1112  
   96 in 1213  
   84 in 1314  
   82 in 1415  
 24 episodes with M536 & (Y037 | Y264)  
   1 in 0708  
   7 in 0809  
   4 in 0910  
   3 in 1011  
   3 in 1112  
   3 in 1213  
   3 in 1314  
   0 in 1415

Duplicated episodes

-----  
 1410 duplicated episodes removed  
 563053 episodes remaining

Missing data (all episodes)

-----  
 0 episodes with missing PSEUDO\_HESID  
 0 episodes with missing SEX  
 91 episodes with missing ADMIDATE  
 0 episodes with missing ADMIMETH  
 0 episodes with missing PROCODE3  
 0 episodes with missing FYEAR

91 unique episodes with missing essential fields  
91 patients  
476 episodes for these patients to be dropped  
562577 remaining episodes  
101004 remaining patients

Inclusion criteria (all episodes)

-----  
176 episodes with SEX != 2  
176 unique episodes not matching inclusion criteria  
176 patients  
176 episodes for these patients to be dropped  
562401 remaining episodes  
100914 remaining patients

Find index episodes

-----  
109136 episodes with at least 1 main tape/mesh code in OPERTN  
100914 index episodes  
0 patients with no index

Missing data (index episodes)

-----  
60 index episodes with missing STARTAGE  
60 unique index episodes with missing essential data  
60 patients  
69 episodes for these patients to be dropped  
562332 remaining episodes  
100854 remaining patients

Find index episodes

-----  
109076 episodes with at least 1 main tape/mesh code in OPERTN  
100854 index episodes  
0 patients with no index

Inclusion criteria (index episodes)

-----  
46 index episodes with STARTAGE < 18  
9 index episodes with disallowed ADMIMETH  
55 unique index episodes not matching inclusion criteria  
55 patients  
656 episodes for these patients to be dropped  
561676 remaining episodes  
100799 remaining patients

Patients with episodes AFTER date of death

-----  
923 in-hospital death episodes  
864 in-hospital death spells  
4 patients with episodes AFTER date of death  
SPELL ADMIDATE DISDATE  
64212 2008-05-11 2008-05-11  
209551 2010-06-10 2010-07-03  
227932 2013-02-05 2013-02-05  
416586 2012-05-10 2012-05-11  
NA <NA> <NA>  
5 patients  
45 episodes for these patients to be dropped  
561631 remaining episodes  
100795 remaining patients

Find index episodes

-----  
109016 episodes with at least 1 main tape/mesh code in OPERTN  
100795 index episodes  
0 patients with no index

Bad OPCS and ICD-10 codes

-----  
0 bad OPERTN codes out of 561631 episodes  
0 bad DIAG codes out of 561631 episodes



SUI index spells

-----

101364 episodes in index spells  
100795 index episodes  
569 non-index episodes

Information about index spells

-----

100795 index spells  
446 index spells with >1 episode  
93911 index spells with SUI diagnosis  
6884 index spells without SUI diagnosis  
100795 index spells with demographic details found  
1 spells with LoS < 0 days; LoS set to NA  
93911 spells with SUI diagnosis and demographic details

Classify index spells by type of mesh operation

-----

391 index episodes with removal of mesh  
284 index episodes with repair of mesh  
10 index episodes with renewal of mesh  
2139 index episodes involving POP surgery  
2810 index episodes with mesh removal/repair/renewal or pop surgery  
1665 'index' spells with repair/removal/renewal or POP surgery - excluded  
92246 remaining index spells (92246 patients)

37796 index episodes including TOT main code

61017 index episodes including TVT main code

995 index episodes including MS main code

Check for combinations of TVT, TOT, MS:

0 spells with no TVT, TOT or MS

92186 spells with one of TVT, TOT or MS

60 spells with more than one TVT, TOT or MS

34704 index spells with TOT only

56648 index spells with TVT only

834 index spells with MS only

60 index spells with combination

92724 episodes in eligible spells marked

Identify spells with complication

-----

92724 index episodes in eligible spells

2906 index episodes in eligible spells with complication

2866 eligible index spells with complication

spells with complication written in code normalised order to spells.comp:

20020 code chunks

2866 unique spells

2947 unique episodes

Index spells with 'late' operations

-----

62 index spells with late operation code (Y712, Y713, Y716, Y717)

Generating activity graph

-----

Activity graph written to figure/activity.pdf

Index spells with cystoscopy

-----

22736 index spells with endoscopy of bladder

31 index spells with endoscopy of urethra

22747 index spells with endoscopy of either bladder or urethra

2494 index spells with catheterization

Split cohort by presence of confounding procedure

-----

2947 episodes in bad spells

92246 eligible index spells

68045 index spells without confounding operation

24201 index spells with confounding operation

Unconfounded spells with combination treated as confounded

68002 index spells without confounding operation  
24244 index spells with confounding operation

24230 eligible index spell episodes with confounding operation  
68494 eligible index spell episodes without confounding operation

Confounding procedures in index spells (by OPCS-4 section)

-----  
(Potential rescue procedures included in this list)

| OPCS section | Frequency |
|--------------|-----------|
| A48          | 1         |
| A70          | 1         |
| A73          | 30        |
| A79          | 1         |
| B28          | 5         |
| B34          | 2         |
| B35          | 1         |
| C17          | 1         |
| C71          | 1         |
| D15          | 1         |
| E04          | 1         |
| E33          | 1         |
| E36          | 2         |
| E37          | 1         |
| E42          | 4         |
| E48          | 1         |
| E59          | 1         |
| F09          | 1         |
| F10          | 1         |
| F17          | 1         |
| G28          | 1         |
| G43          | 1         |
| G45          | 9         |
| G47          | 1         |
| G69          | 6         |
| G74          | 5         |
| G78          | 12        |
| H02          | 2         |
| H03          | 1         |
| H04          | 1         |
| H07          | 1         |
| H10          | 1         |
| H11          | 1         |
| H15          | 8         |
| H19          | 4         |
| H20          | 2         |
| H22          | 1         |
| H24          | 1         |
| H25          | 4         |
| H28          | 1         |
| H29          | 1         |
| H30          | 1         |
| H33          | 16        |
| H35          | 103       |
| H36          | 87        |
| H41          | 18        |
| H42          | 44        |
| H44          | 1         |
| H46          | 9         |
| H48          | 42        |
| H50          | 26        |
| H51          | 12        |
| H52          | 6         |
| H55          | 3         |
| H56          | 12        |
| H57          | 3         |
| H58          | 1         |
| H62          | 4         |
| H69          | 1         |
| J18          | 8         |
| J20          | 1         |
| J45          | 4         |
| K63          | 5         |

|     |       |
|-----|-------|
| K66 | 1     |
| K75 | 2     |
| L13 | 2     |
| L68 | 6     |
| L70 | 9     |
| L71 | 7     |
| L91 | 2     |
| L93 | 4     |
| L94 | 1     |
| L97 | 5     |
| M02 | 1     |
| M06 | 2     |
| M10 | 1     |
| M13 | 1     |
| M15 | 1     |
| M16 | 1     |
| M17 | 2     |
| M18 | 1     |
| M19 | 11    |
| M20 | 1     |
| M22 | 2     |
| M25 | 18    |
| M27 | 10    |
| M29 | 25    |
| M32 | 7     |
| M33 | 3     |
| M34 | 3     |
| M35 | 1     |
| M36 | 17    |
| M37 | 138   |
| M38 | 589   |
| M39 | 2     |
| M41 | 5     |
| M42 | 34    |
| M43 | 316   |
| M44 | 61    |
| M48 | 11    |
| M49 | 82    |
| M51 | 13    |
| M52 | 86    |
| M53 | 663   |
| M54 | 40    |
| M55 | 4     |
| M56 | 32    |
| M58 | 10    |
| M64 | 1     |
| M72 | 42    |
| M73 | 65    |
| M75 | 4     |
| M76 | 195   |
| M79 | 160   |
| M81 | 44    |
| O14 | 1     |
| O23 | 3     |
| O26 | 2     |
| O30 | 2     |
| P01 | 3     |
| P03 | 52    |
| P05 | 392   |
| P06 | 40    |
| P07 | 18    |
| P09 | 231   |
| P11 | 53    |
| P13 | 1744  |
| P14 | 14    |
| P15 | 23    |
| P17 | 9     |
| P18 | 119   |
| P19 | 13    |
| P20 | 296   |
| P21 | 37    |
| P22 | 160   |
| P23 | 22044 |

|     |      |
|-----|------|
| P24 | 2433 |
| P25 | 521  |
| P26 | 144  |
| P27 | 30   |
| P29 | 206  |
| P31 | 57   |
| P32 | 13   |
| Q01 | 198  |
| Q02 | 117  |
| Q03 | 25   |
| Q05 | 16   |
| Q07 | 545  |
| Q08 | 4923 |
| Q09 | 13   |
| Q10 | 105  |
| Q11 | 2    |
| Q12 | 2338 |
| Q15 | 14   |
| Q16 | 405  |
| Q17 | 480  |
| Q20 | 76   |
| Q22 | 671  |
| Q23 | 221  |
| Q24 | 14   |
| Q25 | 5    |
| Q27 | 11   |
| Q28 | 1    |
| Q31 | 6    |
| Q32 | 3    |
| Q35 | 400  |
| Q36 | 3    |
| Q37 | 4    |
| Q38 | 6    |
| Q41 | 8    |
| Q43 | 39   |
| Q44 | 2    |
| Q45 | 5    |
| Q47 | 19   |
| Q49 | 90   |
| Q51 | 3    |
| Q52 | 8    |
| Q54 | 250  |
| S02 | 18   |
| S03 | 2    |
| S04 | 1    |
| S06 | 109  |
| S08 | 1    |
| S11 | 4    |
| S13 | 27   |
| S15 | 6    |
| S17 | 1    |
| S23 | 3    |
| S24 | 2    |
| S25 | 2    |
| S27 | 2    |
| S31 | 1    |
| S36 | 1    |
| S39 | 20   |
| S40 | 1    |
| S41 | 2    |
| S42 | 9    |
| S43 | 2    |
| S47 | 9    |
| S50 | 1    |
| S52 | 55   |
| S53 | 2    |
| S57 | 9    |
| S60 | 52   |
| S62 | 18   |
| S70 | 1    |
| T12 | 2    |
| T20 | 13   |
| T21 | 2    |

|     |     |
|-----|-----|
| T24 | 14  |
| T25 | 12  |
| T26 | 1   |
| T27 | 6   |
| T28 | 6   |
| T29 | 4   |
| T30 | 61  |
| T31 | 4   |
| T33 | 3   |
| T34 | 12  |
| T36 | 16  |
| T41 | 114 |
| T42 | 206 |
| T43 | 236 |
| T46 | 22  |
| T48 | 4   |
| T50 | 2   |
| T57 | 32  |
| T87 | 3   |
| T96 | 3   |
| T97 | 1   |
| W06 | 1   |
| W20 | 1   |
| W24 | 1   |
| W28 | 1   |
| W33 | 1   |
| W47 | 1   |
| X33 | 9   |
| X34 | 4   |
| X35 | 2   |
| X37 | 1   |
| X38 | 5   |
| X40 | 3   |
| X41 | 1   |
| X49 | 1   |
| X50 | 5   |
| X52 | 1   |
| X70 | 6   |
| X83 | 13  |
| X85 | 216 |
| X87 | 1   |
| X90 | 2   |
| X92 | 2   |
| X95 | 1   |
| X96 | 1   |
| Y03 | 199 |
| Y05 | 10  |
| Y06 | 33  |
| Y07 | 8   |
| Y08 | 4   |
| Y10 | 1   |
| Y11 | 108 |
| Y12 | 1   |
| Y13 | 50  |
| Y14 | 2   |
| Y15 | 2   |
| Y16 | 1   |
| Y17 | 1   |
| Y18 | 35  |
| Y20 | 125 |
| Y26 | 65  |
| Y27 | 55  |
| Y30 | 3   |
| Y36 | 21  |
| Y37 | 4   |
| Y38 | 12  |
| Y39 | 1   |
| Y40 | 5   |
| Y44 | 5   |
| Y51 | 1   |
| Y56 | 2   |
| Y59 | 1   |
| Y60 | 81  |

|     |      |
|-----|------|
| Y61 | 3    |
| Y62 | 1    |
| Y63 | 1    |
| Y67 | 5    |
| Y69 | 8    |
| Y71 | 302  |
| Y78 | 1    |
| Y95 | 2    |
| Z02 | 1    |
| Z06 | 1    |
| Z11 | 78   |
| Z15 | 1    |
| Z18 | 1    |
| Z24 | 2    |
| Z27 | 9    |
| Z28 | 5    |
| Z29 | 9    |
| Z37 | 5    |
| Z38 | 1    |
| Z39 | 1    |
| Z40 | 50   |
| Z45 | 44   |
| Z46 | 13   |
| Z47 | 1    |
| Z48 | 2    |
| Z49 | 75   |
| Z50 | 41   |
| Z57 | 2    |
| Z58 | 2    |
| Z60 | 3    |
| Z62 | 1    |
| Z66 | 35   |
| Z67 | 1    |
| Z72 | 1    |
| Z75 | 3    |
| Z76 | 1    |
| Z85 | 1    |
| Z86 | 1    |
| Z87 | 1    |
| Z89 | 1    |
| Z90 | 7    |
| Z91 | 3    |
| Z92 | 115  |
| Z93 | 5    |
| Z94 | 1053 |
| Z95 | 4    |
| Z96 | 11   |
| Z98 | 2    |
| Z99 | 1    |

Confounding procedures in index spells (by OPCS-4 chapter)

-----  
(Potential rescue procedures included in this list)

| OPCS chapter | Frequency |
|--------------|-----------|
| A            | 33        |
| B            | 8         |
| C            | 2         |
| D            | 1         |
| E            | 11        |
| F            | 3         |
| G            | 35        |
| H            | 418       |
| J            | 13        |
| K            | 8         |
| L            | 36        |
| M            | 2705      |
| O            | 8         |
| P            | 28652     |
| Q            | 11026     |
| S            | 361       |
| T            | 779       |
| W            | 6         |
| X            | 274       |

Y 1159  
Z 1594

Summary of split cohorts

-----  
34704 index spells with TOT introduction only  
25509 unconfounded index spells with TOT introduction only  
9195 confounded index spells with TOT introduction only  
56648 index spells with TVT introduction only  
41880 unconfounded index spells with TVT introduction only  
14768 confounded index spells with TVT introduction only  
834 index spells with minisling introduction only  
613 unconfounded index spells with minisling introduction only  
221 confounded index spells with minisling introduction only  
60 index spells with combination (or none)  
0 unconfounded index spells with combination (or none)  
60 confounded index spells with combination (or none)

Unconfounded cohort characteristics

-----  
68002 all patients  
50 ( 44 to 61 ) median (IQR) age, years  
179 different providers  
67932 elective admissions  
1 ( 0 to 1 ) median (IQR) LoS, days  
9537 / 68002 ( 14.02 %) staying longer than 1 night  
LoS distribution: LoS freq  
0 31445  
1 26937  
2 6386  
3 1762  
4 701  
5 317  
6 131  
7 95  
8 54  
9 36  
10 14  
11 6  
12 8  
13 3  
14 2  
15 10  
16 3  
17 1  
19 2  
20 1  
21 1  
25 2  
31 1  
33 1  
68002 patients with one of TVT, TOT or MS  
50 ( 44 to 61 ) median (IQR) age, years  
179 different providers  
67932 elective admissions  
1 ( 0 to 1 ) median (IQR) LoS, days  
9537 / 68002 ( 14.02 %) staying longer than 1 night  
LoS distribution: LoS freq  
0 31445  
1 26937  
2 6386  
3 1762  
4 701  
5 317  
6 131  
7 95  
8 54  
9 36  
10 14  
11 6  
12 8  
13 3

|    |    |
|----|----|
| 14 | 2  |
| 15 | 10 |
| 16 | 3  |
| 17 | 1  |
| 19 | 2  |
| 20 | 1  |
| 21 | 1  |
| 25 | 2  |
| 31 | 1  |
| 33 | 1  |

25509 patients with TOT only

- 51 ( 44 to 61 ) median (IQR) age, years
- 170 different providers
- 25490 elective admissions
- 1 ( 0 to 1 ) median (IQR) LoS, days
- 0 in-hospital deaths
- 5473 admissions with endoscopic examination of bladder (M45)
- 14 admissions with endoscopic examination of urethra (M77)
- 5477 admissions with endoscopic examination of urethra or bladder
- 444 admissions with catheterization

41880 patients with TVT only

- 50 ( 44 to 60 ) median (IQR) age, years
- 175 different providers
- 41831 elective admissions
- 1 ( 0 to 1 ) median (IQR) LoS, days
- 0 in-hospital deaths
- 11460 admissions with endoscopic examination of bladder (M45)
- 13 admissions with endoscopic examination of urethra (M77)
- 11466 admissions with endoscopic examination of urethra or bladder
- 928 admissions with catheterization

613 patients with minisling only

- 52 ( 45 to 62 ) median (IQR) age, years
- 67 different providers
- 611 elective admissions
- 2 ( 0 to 4 ) median (IQR) LoS, days
- 0 in-hospital deaths
- 125 admissions with endoscopic examination of bladder (M45)
- 0 admissions with endoscopic examination of urethra (M77)
- 125 admissions with endoscopic examination of urethra or bladder
- 11 admissions with catheterization

0 patients with combination of TVT, TOT, MS

- NA ( NA to NA ) median (IQR) age, years
- 0 different providers
- 0 elective admissions
- NA ( NA to NA ) median (IQR) LoS, days
- 0 in-hospital deaths
- 0 admissions with endoscopic examination of bladder (M45)
- 0 admissions with endoscopic examination of urethra (M77)
- 0 admissions with endoscopic examination of urethra or bladder
- 0 admissions with catheterization

Confounded cohort characteristics

-----

24244 all patients

- 51 ( 44 to 62 ) median (IQR) age, years
- 181 different providers
- 24182 elective admissions
- 2 ( 1 to 3 ) median (IQR) LoS, days
- 15853 / 24244 ( 65.39 %) staying longer than 1 night
- LoS distribution:   LoS freq

|    |      |
|----|------|
| 0  | 2563 |
| 1  | 5750 |
| 2  | 6940 |
| 3  | 4807 |
| 4  | 2131 |
| 5  | 922  |
| 6  | 439  |
| 7  | 217  |
| 8  | 150  |
| 9  | 79   |
| 10 | 39   |
| 11 | 37   |
| 12 | 16   |



|    |    |
|----|----|
| 13 | 10 |
| 14 | 10 |
| 15 | 9  |
| 16 | 3  |
| 17 | 9  |
| 18 | 5  |
| 19 | 3  |
| 20 | 3  |
| 21 | 4  |
| 22 | 5  |
| 23 | 1  |
| 24 | 2  |
| 25 | 1  |
| 26 | 1  |
| 28 | 1  |
| 29 | 1  |
| 30 | 2  |
| 31 | 1  |
| 32 | 1  |
| 38 | 1  |
| 73 | 1  |
| 78 | 1  |
| 90 | 1  |

24184 patients with one of TVT, TOT or MS  
51 ( 44 to 62 ) median (IQR) age, years  
181 different providers  
24122 elective admissions  
2 ( 1 to 3 ) median (IQR) LoS, days  
15829 / 24184 ( 65.45 %) staying longer than 1 night  
LoS distribution:      LoS freq

|    |      |
|----|------|
| 0  | 2544 |
| 1  | 5733 |
| 2  | 6928 |
| 3  | 4802 |
| 4  | 2128 |
| 5  | 921  |
| 6  | 436  |
| 7  | 217  |
| 8  | 150  |
| 9  | 79   |
| 10 | 39   |
| 11 | 37   |
| 12 | 16   |
| 13 | 10   |
| 14 | 10   |
| 15 | 9    |
| 16 | 3    |
| 17 | 9    |
| 18 | 5    |
| 19 | 3    |
| 20 | 3    |
| 21 | 4    |
| 22 | 5    |
| 23 | 1    |
| 24 | 2    |
| 25 | 1    |
| 26 | 1    |
| 28 | 1    |
| 29 | 1    |
| 30 | 2    |
| 31 | 1    |
| 32 | 1    |
| 38 | 1    |
| 73 | 1    |
| 78 | 1    |
| 90 | 1    |

9195 patients with TOT only  
51 ( 45 to 63 ) median (IQR) age, years  
158 different providers  
9180 elective admissions  
2 ( 1 to 3 ) median (IQR) LoS, days  
0 in-hospital deaths  
1825 admissions with endoscopic examination of bladder (M45)

2 admissions with endoscopic examination of urethra (M77)  
 1825 admissions with endoscopic examination of urethra or bladder  
 324 admissions with catheterization  
 14768 patients with TVT only  
   51 ( 44 to 62 ) median (IQR) age, years  
   172 different providers  
   14722 elective admissions  
   2 ( 1 to 3 ) median (IQR) LoS, days  
   0 in-hospital deaths  
   3780 admissions with endoscopic examination of bladder (M45)  
   2 admissions with endoscopic examination of urethra (M77)  
   3781 admissions with endoscopic examination of urethra or bladder  
   759 admissions with catheterization  
 221 patients with minisling only  
   50 ( 41 to 63 ) median (IQR) age, years  
   54 different providers  
   220 elective admissions  
   3 ( 2 to 7 ) median (IQR) LoS, days  
   0 in-hospital deaths  
   53 admissions with endoscopic examination of bladder (M45)  
   0 admissions with endoscopic examination of urethra (M77)  
   53 admissions with endoscopic examination of urethra or bladder  
   27 admissions with catheterization  
 60 patients with combination of TVT, TOT, MS  
   49 ( 42 to 63.25 ) median (IQR) age, years  
   35 different providers  
   60 elective admissions  
   1 ( 0 to 2 ) median (IQR) LoS, days  
   0 in-hospital deaths  
   20 admissions with endoscopic examination of bladder (M45)  
   0 admissions with endoscopic examination of urethra (M77)  
   20 admissions with endoscopic examination of urethra or bladder  
   1 admissions with catheterization

Summary of peri-procedural complications in both parts of cohort

-----

2866 spells with complication  
   1618 spells in unconfounded operations  
     356 TOT  
     1232 TVT  
     30 minisling  
     0 combination  
   1248 spells in confounded operations  
     342 TOT  
     880 TVT  
     23 minisling  
     3 combination

Complications in unconfounded operations

-----

All reported complications:

1271 TVT  
 365 TOT  
 34 MS  
 0 comb

Complication code (no supplementary code):

| CompCode | TVT | TOT | MS | comb |
|----------|-----|-----|----|------|
| G97      | 1   | 0   | 0  | 0    |
| I97      | 0   | 3   | 0  | 0    |
| J95      | 0   | 2   | 0  | 0    |
| N99      | 43  | 11  | 0  | 0    |
| T81      | 409 | 69  | 18 | 0    |
| T82      | 2   | 0   | 0  | 0    |
| T83      | 15  | 9   | 2  | 0    |
| T88      | 8   | 6   | 0  | 0    |

Complication code (with supplementary code):

| CompCode | TVT | TOT | MS | comb |
|----------|-----|-----|----|------|
| K91      | 1   | 0   | 0  | 0    |
| N99      | 3   | 0   | 0  | 0    |
| T80      | 1   | 0   | 0  | 0    |
| T81      | 234 | 22  | 3  | 0    |

|     |    |   |   |   |
|-----|----|---|---|---|
| T83 | 11 | 2 | 0 | 0 |
| T85 | 1  | 0 | 0 | 0 |
| T88 | 6  | 3 | 0 | 0 |

By main diagnosis code (with supplementary code):

| MainCode | TVT | TOT | MS | comb |
|----------|-----|-----|----|------|
| A09      | 1   | 0   | 0  | 0    |
| B96      | 2   | 1   | 0  | 0    |
| D64      | 3   | 1   | 0  | 0    |
| E03      | 1   | 2   | 0  | 0    |
| E27      | 2   | 0   | 0  | 0    |
| E87      | 3   | 0   | 0  | 0    |
| E89      | 0   | 2   | 0  | 0    |
| G21      | 0   | 1   | 0  | 0    |
| G40      | 2   | 0   | 0  | 0    |
| G62      | 0   | 1   | 0  | 0    |
| G81      | 0   | 1   | 0  | 0    |
| H83      | 1   | 0   | 0  | 0    |
| I10      | 4   | 1   | 0  | 0    |
| I48      | 2   | 3   | 1  | 0    |
| I64      | 0   | 1   | 0  | 0    |
| I80      | 1   | 0   | 0  | 0    |
| I95      | 6   | 4   | 0  | 0    |
| J18      | 0   | 1   | 1  | 0    |
| J22      | 2   | 1   | 0  | 0    |
| J44      | 1   | 0   | 0  | 0    |
| J45      | 1   | 0   | 0  | 0    |
| J98      | 3   | 0   | 0  | 0    |
| K21      | 1   | 0   | 0  | 0    |
| K44      | 0   | 1   | 0  | 0    |
| K52      | 1   | 0   | 0  | 0    |
| K59      | 0   | 1   | 1  | 0    |
| L02      | 0   | 1   | 0  | 0    |
| L27      | 2   | 0   | 0  | 0    |
| L29      | 2   | 1   | 0  | 0    |
| M25      | 1   | 4   | 0  | 0    |
| M54      | 0   | 3   | 0  | 0    |
| M79      | 4   | 7   | 0  | 0    |
| N19      | 2   | 0   | 0  | 0    |
| N32      | 2   | 1   | 0  | 0    |
| N39      | 13  | 5   | 2  | 0    |
| N81      | 1   | 0   | 0  | 0    |
| N84      | 0   | 1   | 0  | 0    |
| N89      | 0   | 2   | 0  | 0    |
| N93      | 0   | 3   | 0  | 0    |
| N94      | 0   | 1   | 0  | 0    |
| N99      | 1   | 0   | 0  | 0    |
| R00      | 7   | 1   | 0  | 0    |
| R03      | 6   | 1   | 0  | 0    |
| R07      | 5   | 2   | 0  | 0    |
| R10      | 7   | 3   | 0  | 0    |
| R11      | 9   | 2   | 1  | 0    |
| R14      | 1   | 0   | 0  | 0    |
| R20      | 0   | 1   | 0  | 0    |
| R21      | 1   | 0   | 0  | 0    |
| R25      | 0   | 1   | 0  | 0    |
| R29      | 0   | 1   | 0  | 0    |
| R30      | 1   | 0   | 1  | 0    |
| R31      | 12  | 1   | 0  | 0    |
| R32      | 3   | 0   | 0  | 0    |
| R33      | 350 | 152 | 3  | 0    |
| R35      | 0   | 1   | 0  | 0    |
| R39      | 12  | 10  | 0  | 0    |
| R40      | 2   | 0   | 0  | 0    |
| R42      | 5   | 3   | 0  | 0    |
| R46      | 0   | 0   | 1  | 0    |
| R47      | 1   | 0   | 0  | 0    |
| R50      | 2   | 0   | 0  | 0    |
| R51      | 5   | 0   | 0  | 0    |
| R52      | 1   | 0   | 0  | 0    |
| R55      | 14  | 4   | 0  | 0    |
| S31      | 1   | 0   | 0  | 0    |
| S37      | 23  | 2   | 0  | 0    |

|     |   |   |   |   |
|-----|---|---|---|---|
| T31 | 1 | 0 | 0 | 0 |
| T45 | 0 | 1 | 0 | 0 |
| T78 | 1 | 0 | 0 | 0 |
| Z86 | 0 | 1 | 0 | 0 |
| Z92 | 1 | 0 | 0 | 0 |

By supplementary code:

| SuppCode | TVT | TOT | MS | comb |
|----------|-----|-----|----|------|
| Y40      | 3   | 1   | 0  | 0    |
| Y41      | 0   | 1   | 0  | 0    |
| Y42      | 3   | 1   | 0  | 0    |
| Y43      | 3   | 1   | 0  | 0    |
| Y45      | 7   | 5   | 1  | 0    |
| Y47      | 1   | 0   | 0  | 0    |
| Y48      | 6   | 1   | 0  | 0    |
| Y49      | 1   | 1   | 0  | 0    |
| Y52      | 2   | 0   | 0  | 0    |
| Y56      | 0   | 1   | 0  | 0    |
| Y57      | 3   | 1   | 0  | 0    |
| Y60      | 165 | 12  | 0  | 0    |
| Y69      | 1   | 0   | 0  | 0    |
| Y73      | 4   | 0   | 0  | 0    |
| Y76      | 2   | 0   | 0  | 0    |
| Y81      | 2   | 0   | 0  | 0    |
| Y82      | 1   | 0   | 0  | 0    |
| Y83      | 577 | 237 | 13 | 0    |
| Y84      | 12  | 3   | 0  | 0    |

By type of complication:

765 spells with procedure complication ( 774 complications)  
656 TVT  
90 TOT  
19 MS  
0 combinations

115 spells with device complication ( 116 complications)  
83 TVT  
28 TOT  
4 MS  
0 combinations

592 spells with complication with urinary symptoms ( 594 complications)  
416 TVT  
172 TOT  
4 MS  
0 combinations

222 spells with other complication  
140 TVT  
76 TOT  
6 MS  
0 combinations

Most common complications:

Complication code (with or without supplementary code):

| CompCode | TVT | TOT | MS | sum |
|----------|-----|-----|----|-----|
| T81      | 643 | 91  | 21 | 755 |
| N99      | 46  | 11  | 0  | 57  |
| T83      | 26  | 11  | 2  | 39  |
| T88      | 14  | 9   | 0  | 23  |
| I97      | 0   | 3   | 0  | 3   |
| J95      | 0   | 2   | 0  | 2   |
| T82      | 2   | 0   | 0  | 2   |
| G97      | 1   | 0   | 0  | 1   |
| K91      | 1   | 0   | 0  | 1   |
| T80      | 1   | 0   | 0  | 1   |
| T85      | 1   | 0   | 0  | 1   |

Main code (with supplementary code):

| MainCode | TVT | TOT | MS | sum |
|----------|-----|-----|----|-----|
| R33      | 350 | 152 | 3  | 505 |
| S37      | 23  | 2   | 0  | 25  |
| R39      | 12  | 10  | 0  | 22  |
| N39      | 13  | 5   | 2  | 20  |
| R55      | 14  | 4   | 0  | 18  |
| R31      | 12  | 1   | 0  | 13  |

|     |   |   |   |    |
|-----|---|---|---|----|
| R11 | 9 | 2 | 1 | 12 |
| M79 | 4 | 7 | 0 | 11 |
| I95 | 6 | 4 | 0 | 10 |
| R10 | 7 | 3 | 0 | 10 |
| R00 | 7 | 1 | 0 | 8  |
| R42 | 5 | 3 | 0 | 8  |
| R03 | 6 | 1 | 0 | 7  |
| R07 | 5 | 2 | 0 | 7  |
| I48 | 2 | 3 | 1 | 6  |
| I10 | 4 | 1 | 0 | 5  |
| M25 | 1 | 4 | 0 | 5  |
| R51 | 5 | 0 | 0 | 5  |
| D64 | 3 | 1 | 0 | 4  |
| B96 | 2 | 1 | 0 | 3  |
| E03 | 1 | 2 | 0 | 3  |
| E87 | 3 | 0 | 0 | 3  |
| J22 | 2 | 1 | 0 | 3  |
| J98 | 3 | 0 | 0 | 3  |
| L29 | 2 | 1 | 0 | 3  |
| M54 | 0 | 3 | 0 | 3  |
| N32 | 2 | 1 | 0 | 3  |
| N93 | 0 | 3 | 0 | 3  |
| R32 | 3 | 0 | 0 | 3  |
| E27 | 2 | 0 | 0 | 2  |
| E89 | 0 | 2 | 0 | 2  |
| G40 | 2 | 0 | 0 | 2  |
| J18 | 0 | 1 | 1 | 2  |
| K59 | 0 | 1 | 1 | 2  |
| L27 | 2 | 0 | 0 | 2  |
| N19 | 2 | 0 | 0 | 2  |
| N89 | 0 | 2 | 0 | 2  |
| R30 | 1 | 0 | 1 | 2  |
| R40 | 2 | 0 | 0 | 2  |
| R50 | 2 | 0 | 0 | 2  |
| A09 | 1 | 0 | 0 | 1  |
| G21 | 0 | 1 | 0 | 1  |
| G62 | 0 | 1 | 0 | 1  |
| G81 | 0 | 1 | 0 | 1  |
| H83 | 1 | 0 | 0 | 1  |
| I64 | 0 | 1 | 0 | 1  |
| I80 | 1 | 0 | 0 | 1  |
| J44 | 1 | 0 | 0 | 1  |
| J45 | 1 | 0 | 0 | 1  |
| K21 | 1 | 0 | 0 | 1  |
| K44 | 0 | 1 | 0 | 1  |
| K52 | 1 | 0 | 0 | 1  |
| L02 | 0 | 1 | 0 | 1  |
| N81 | 1 | 0 | 0 | 1  |
| N84 | 0 | 1 | 0 | 1  |
| N94 | 0 | 1 | 0 | 1  |
| N99 | 1 | 0 | 0 | 1  |
| R14 | 1 | 0 | 0 | 1  |
| R20 | 0 | 1 | 0 | 1  |
| R21 | 1 | 0 | 0 | 1  |
| R25 | 0 | 1 | 0 | 1  |
| R29 | 0 | 1 | 0 | 1  |
| R35 | 0 | 1 | 0 | 1  |
| R46 | 0 | 0 | 1 | 1  |
| R47 | 1 | 0 | 0 | 1  |
| R52 | 1 | 0 | 0 | 1  |
| S31 | 1 | 0 | 0 | 1  |
| T31 | 1 | 0 | 0 | 1  |
| T45 | 0 | 1 | 0 | 1  |
| T78 | 1 | 0 | 0 | 1  |
| Z86 | 0 | 1 | 0 | 1  |
| Z92 | 1 | 0 | 0 | 1  |

Complication code (with or without supplementary code) in 'other' group:

| CompCode | TVT | TOT | MS | sum |
|----------|-----|-----|----|-----|
| T88      | 14  | 9   | 0  | 23  |
| T83      | 4   | 5   | 1  | 10  |
| N99      | 7   | 2   | 0  | 9   |
| I97      | 0   | 3   | 0  | 3   |

|     |   |   |   |   |
|-----|---|---|---|---|
| J95 | 0 | 2 | 0 | 2 |
| T82 | 2 | 0 | 0 | 2 |
| G97 | 1 | 0 | 0 | 1 |
| K91 | 1 | 0 | 0 | 1 |
| T80 | 1 | 0 | 0 | 1 |

Main code (with supplementary code) in 'other' group:

| MainCode | TVT | TOT | MS | sum |
|----------|-----|-----|----|-----|
| N39      | 12  | 3   | 2  | 17  |
| R55      | 11  | 3   | 0  | 14  |
| M79      | 4   | 6   | 0  | 10  |
| R11      | 6   | 2   | 0  | 8   |
| I95      | 5   | 2   | 0  | 7   |
| R00      | 6   | 1   | 0  | 7   |
| R07      | 5   | 2   | 0  | 7   |
| R10      | 5   | 1   | 0  | 6   |
| R42      | 3   | 3   | 0  | 6   |
| I48      | 2   | 2   | 1  | 5   |
| R51      | 5   | 0   | 0  | 5   |
| S37      | 4   | 1   | 0  | 5   |
| I10      | 3   | 1   | 0  | 4   |
| R03      | 4   | 0   | 0  | 4   |
| D64      | 2   | 1   | 0  | 3   |
| E03      | 1   | 2   | 0  | 3   |
| J22      | 2   | 1   | 0  | 3   |
| L29      | 2   | 1   | 0  | 3   |
| M25      | 1   | 2   | 0  | 3   |
| M54      | 0   | 3   | 0  | 3   |
| N32      | 2   | 1   | 0  | 3   |
| B96      | 1   | 1   | 0  | 2   |
| E27      | 2   | 0   | 0  | 2   |
| E87      | 2   | 0   | 0  | 2   |
| E89      | 0   | 2   | 0  | 2   |
| G40      | 2   | 0   | 0  | 2   |
| J18      | 0   | 1   | 1  | 2   |
| J98      | 2   | 0   | 0  | 2   |
| L27      | 2   | 0   | 0  | 2   |
| N19      | 2   | 0   | 0  | 2   |
| N93      | 0   | 2   | 0  | 2   |
| R40      | 2   | 0   | 0  | 2   |
| A09      | 1   | 0   | 0  | 1   |
| G21      | 0   | 1   | 0  | 1   |
| G81      | 0   | 1   | 0  | 1   |
| H83      | 1   | 0   | 0  | 1   |
| J45      | 1   | 0   | 0  | 1   |
| K21      | 1   | 0   | 0  | 1   |
| K44      | 0   | 1   | 0  | 1   |
| K52      | 1   | 0   | 0  | 1   |
| K59      | 0   | 1   | 0  | 1   |
| L02      | 0   | 1   | 0  | 1   |
| N81      | 1   | 0   | 0  | 1   |
| N84      | 0   | 1   | 0  | 1   |
| N89      | 0   | 1   | 0  | 1   |
| N94      | 0   | 1   | 0  | 1   |
| N99      | 1   | 0   | 0  | 1   |
| R14      | 1   | 0   | 0  | 1   |
| R20      | 0   | 1   | 0  | 1   |
| R21      | 1   | 0   | 0  | 1   |
| R25      | 0   | 1   | 0  | 1   |
| R29      | 0   | 1   | 0  | 1   |
| R46      | 0   | 0   | 1  | 1   |
| R47      | 1   | 0   | 0  | 1   |
| R50      | 1   | 0   | 0  | 1   |
| S31      | 1   | 0   | 0  | 1   |
| T31      | 1   | 0   | 0  | 1   |
| T45      | 0   | 1   | 0  | 1   |
| T78      | 1   | 0   | 0  | 1   |
| Z86      | 0   | 1   | 0  | 1   |
| Z92      | 1   | 0   | 0  | 1   |

Complications in confounded operations

-----  
All reported complications:

979 TVT  
363 TOT  
32 MS  
3 comb

Complication code (no supplementary code):

| CompCode | TVT | TOT | MS | comb |
|----------|-----|-----|----|------|
| G97      | 1   | 0   | 0  | 0    |
| I97      | 2   | 0   | 0  | 0    |
| J95      | 0   | 2   | 0  | 0    |
| K91      | 1   | 0   | 0  | 0    |
| N99      | 40  | 16  | 0  | 0    |
| T80      | 1   | 0   | 0  | 0    |
| T81      | 344 | 125 | 16 | 1    |
| T82      | 1   | 1   | 0  | 0    |
| T83      | 31  | 7   | 2  | 0    |
| T85      | 5   | 0   | 0  | 0    |
| T88      | 10  | 3   | 0  | 0    |

Complication code (with supplementary code):

| CompCode | TVT | TOT | MS | comb |
|----------|-----|-----|----|------|
| G97      | 1   | 0   | 0  | 0    |
| K91      | 1   | 0   | 0  | 0    |
| T81      | 140 | 41  | 4  | 1    |
| T83      | 10  | 9   | 1  | 1    |
| T84      | 1   | 0   | 0  | 0    |
| T85      | 0   | 3   | 0  | 0    |
| T88      | 2   | 2   | 0  | 0    |

By main diagnosis code (with supplementary code):

| MainCode | TVT | TOT | MS | comb |
|----------|-----|-----|----|------|
| A09      | 1   | 0   | 0  | 0    |
| B37      | 0   | 0   | 3  | 0    |
| B96      | 5   | 1   | 0  | 0    |
| D50      | 1   | 0   | 0  | 0    |
| D62      | 1   | 0   | 0  | 0    |
| D64      | 8   | 0   | 0  | 0    |
| E03      | 2   | 0   | 0  | 0    |
| E11      | 1   | 0   | 0  | 0    |
| E86      | 1   | 0   | 0  | 0    |
| E87      | 1   | 0   | 0  | 0    |
| E89      | 1   | 0   | 0  | 0    |
| G40      | 1   | 0   | 0  | 0    |
| G80      | 0   | 1   | 0  | 0    |
| H00      | 1   | 0   | 0  | 0    |
| I10      | 1   | 0   | 0  | 0    |
| I21      | 1   | 0   | 0  | 0    |
| I26      | 3   | 0   | 0  | 0    |
| I44      | 1   | 0   | 0  | 0    |
| I46      | 1   | 1   | 0  | 0    |
| I47      | 1   | 1   | 0  | 0    |
| I48      | 4   | 0   | 0  | 0    |
| I95      | 7   | 3   | 0  | 0    |
| J06      | 1   | 0   | 0  | 0    |
| J18      | 8   | 1   | 0  | 0    |
| J22      | 9   | 1   | 1  | 0    |
| J44      | 0   | 0   | 1  | 0    |
| J69      | 1   | 0   | 0  | 0    |
| J90      | 1   | 0   | 0  | 0    |
| J96      | 2   | 1   | 0  | 0    |
| J98      | 1   | 1   | 1  | 0    |
| K21      | 1   | 0   | 0  | 0    |
| K29      | 1   | 0   | 0  | 0    |
| K52      | 1   | 2   | 0  | 0    |
| K56      | 3   | 0   | 0  | 0    |
| K59      | 5   | 2   | 0  | 0    |
| K62      | 1   | 0   | 0  | 0    |
| K82      | 0   | 1   | 0  | 0    |
| L03      | 1   | 0   | 0  | 0    |
| L27      | 2   | 0   | 0  | 0    |
| L50      | 1   | 0   | 0  | 0    |
| L90      | 2   | 0   | 0  | 0    |
| M54      | 1   | 0   | 0  | 0    |

|     |     |    |   |   |
|-----|-----|----|---|---|
| M79 | 2   | 1  | 0 | 0 |
| N17 | 1   | 1  | 0 | 0 |
| N28 | 1   | 0  | 0 | 0 |
| N32 | 1   | 0  | 0 | 0 |
| N39 | 29  | 10 | 1 | 0 |
| N81 | 1   | 1  | 0 | 0 |
| N82 | 1   | 0  | 0 | 0 |
| N85 | 0   | 1  | 0 | 0 |
| N86 | 1   | 0  | 0 | 0 |
| N89 | 1   | 1  | 0 | 0 |
| N90 | 4   | 2  | 0 | 0 |
| N93 | 2   | 1  | 0 | 0 |
| R00 | 8   | 3  | 0 | 0 |
| R03 | 3   | 1  | 0 | 0 |
| R06 | 3   | 3  | 0 | 0 |
| R07 | 2   | 1  | 0 | 0 |
| R10 | 6   | 3  | 0 | 0 |
| R11 | 6   | 4  | 0 | 0 |
| R14 | 0   | 1  | 0 | 0 |
| R19 | 1   | 0  | 0 | 0 |
| R20 | 1   | 1  | 0 | 0 |
| R21 | 1   | 1  | 0 | 0 |
| R25 | 0   | 1  | 0 | 0 |
| R30 | 0   | 1  | 0 | 0 |
| R31 | 3   | 0  | 0 | 0 |
| R32 | 1   | 0  | 0 | 0 |
| R33 | 185 | 86 | 2 | 0 |
| R35 | 1   | 0  | 0 | 0 |
| R39 | 3   | 1  | 0 | 0 |
| R42 | 0   | 1  | 0 | 0 |
| R50 | 6   | 2  | 0 | 0 |
| R51 | 1   | 0  | 0 | 0 |
| R55 | 2   | 3  | 0 | 0 |
| R73 | 1   | 0  | 0 | 0 |
| R94 | 1   | 0  | 0 | 0 |
| S00 | 2   | 0  | 0 | 0 |
| S05 | 0   | 3  | 0 | 0 |
| S30 | 1   | 0  | 0 | 0 |
| S31 | 2   | 1  | 0 | 0 |
| S37 | 13  | 2  | 0 | 0 |
| S39 | 2   | 0  | 0 | 0 |
| T17 | 1   | 0  | 0 | 0 |
| T19 | 1   | 0  | 0 | 0 |
| T24 | 1   | 0  | 0 | 0 |
| T45 | 0   | 1  | 0 | 0 |
| T91 | 1   | 0  | 0 | 0 |

By supplementary code:

| SuppCode | TVT | TOT | MS | comb |
|----------|-----|-----|----|------|
| Y40      | 3   | 1   | 0  | 0    |
| Y41      | 1   | 0   | 0  | 0    |
| Y43      | 0   | 1   | 0  | 0    |
| Y44      | 0   | 1   | 0  | 0    |
| Y45      | 2   | 6   | 0  | 0    |
| Y48      | 6   | 1   | 0  | 0    |
| Y51      | 1   | 2   | 0  | 0    |
| Y52      | 2   | 0   | 0  | 0    |
| Y58      | 0   | 1   | 0  | 0    |
| Y60      | 74  | 17  | 2  | 0    |
| Y61      | 0   | 1   | 0  | 0    |
| Y65      | 1   | 1   | 0  | 0    |
| Y69      | 1   | 0   | 0  | 0    |
| Y70      | 2   | 0   | 0  | 0    |
| Y73      | 0   | 1   | 0  | 0    |
| Y76      | 1   | 2   | 0  | 0    |
| Y81      | 1   | 0   | 0  | 0    |
| Y82      | 1   | 0   | 0  | 0    |
| Y83      | 439 | 170 | 12 | 2    |
| Y84      | 8   | 4   | 0  | 0    |

By type of complication:

633 spells with procedure complication ( 682 complications)  
453 TVT



161 TOT  
 17 MS  
 2 combinations  
 84 spells with device complication ( 86 complications)  
 62 TVT  
 21 TOT  
 0 MS  
 1 combinations  
 311 spells with complication with urinary symptoms ( 312 complications)  
 210 TVT  
 99 TOT  
 2 MS  
 0 combinations  
 286 spells with other complication  
 204 TVT  
 76 TOT  
 6 MS  
 0 combinations

Most common complications:

Complication code (with or without supplementary code):

| CompCode | TVT | TOT | MS | sum |
|----------|-----|-----|----|-----|
| T81      | 484 | 166 | 20 | 670 |
| T83      | 41  | 16  | 3  | 60  |
| N99      | 40  | 16  | 0  | 56  |
| T88      | 12  | 5   | 0  | 17  |
| T85      | 5   | 3   | 0  | 8   |
| G97      | 2   | 0   | 0  | 2   |
| I97      | 2   | 0   | 0  | 2   |
| J95      | 0   | 2   | 0  | 2   |
| K91      | 2   | 0   | 0  | 2   |
| T82      | 1   | 1   | 0  | 2   |
| T80      | 1   | 0   | 0  | 1   |
| T84      | 1   | 0   | 0  | 1   |

Main code (with supplementary code):

| MainCode | TVT | TOT | MS | sum |
|----------|-----|-----|----|-----|
| R33      | 185 | 86  | 2  | 273 |
| N39      | 29  | 10  | 1  | 40  |
| S37      | 13  | 2   | 0  | 15  |
| J22      | 9   | 1   | 1  | 11  |
| R00      | 8   | 3   | 0  | 11  |
| I95      | 7   | 3   | 0  | 10  |
| R11      | 6   | 4   | 0  | 10  |
| J18      | 8   | 1   | 0  | 9   |
| R10      | 6   | 3   | 0  | 9   |
| D64      | 8   | 0   | 0  | 8   |
| R50      | 6   | 2   | 0  | 8   |
| K59      | 5   | 2   | 0  | 7   |
| B96      | 5   | 1   | 0  | 6   |
| N90      | 4   | 2   | 0  | 6   |
| R06      | 3   | 3   | 0  | 6   |
| R55      | 2   | 3   | 0  | 5   |
| I48      | 4   | 0   | 0  | 4   |
| R03      | 3   | 1   | 0  | 4   |
| R39      | 3   | 1   | 0  | 4   |
| B37      | 0   | 0   | 3  | 3   |
| I26      | 3   | 0   | 0  | 3   |
| J96      | 2   | 1   | 0  | 3   |
| J98      | 1   | 1   | 1  | 3   |
| K52      | 1   | 2   | 0  | 3   |
| K56      | 3   | 0   | 0  | 3   |
| M79      | 2   | 1   | 0  | 3   |
| N93      | 2   | 1   | 0  | 3   |
| R07      | 2   | 1   | 0  | 3   |
| R31      | 3   | 0   | 0  | 3   |
| S05      | 0   | 3   | 0  | 3   |
| S31      | 2   | 1   | 0  | 3   |
| E03      | 2   | 0   | 0  | 2   |
| I46      | 1   | 1   | 0  | 2   |
| I47      | 1   | 1   | 0  | 2   |
| L27      | 2   | 0   | 0  | 2   |
| L90      | 2   | 0   | 0  | 2   |

|     |   |   |   |   |
|-----|---|---|---|---|
| N17 | 1 | 1 | 0 | 2 |
| N81 | 1 | 1 | 0 | 2 |
| N89 | 1 | 1 | 0 | 2 |
| R20 | 1 | 1 | 0 | 2 |
| R21 | 1 | 1 | 0 | 2 |
| S00 | 2 | 0 | 0 | 2 |
| S39 | 2 | 0 | 0 | 2 |
| A09 | 1 | 0 | 0 | 1 |
| D50 | 1 | 0 | 0 | 1 |
| D62 | 1 | 0 | 0 | 1 |
| E11 | 1 | 0 | 0 | 1 |
| E86 | 1 | 0 | 0 | 1 |
| E87 | 1 | 0 | 0 | 1 |
| E89 | 1 | 0 | 0 | 1 |
| G40 | 1 | 0 | 0 | 1 |
| G80 | 0 | 1 | 0 | 1 |
| H00 | 1 | 0 | 0 | 1 |
| I10 | 1 | 0 | 0 | 1 |
| I21 | 1 | 0 | 0 | 1 |
| I44 | 1 | 0 | 0 | 1 |
| J06 | 1 | 0 | 0 | 1 |
| J44 | 0 | 0 | 1 | 1 |
| J69 | 1 | 0 | 0 | 1 |
| J90 | 1 | 0 | 0 | 1 |
| K21 | 1 | 0 | 0 | 1 |
| K29 | 1 | 0 | 0 | 1 |
| K62 | 1 | 0 | 0 | 1 |
| K82 | 0 | 1 | 0 | 1 |
| L03 | 1 | 0 | 0 | 1 |
| L50 | 1 | 0 | 0 | 1 |
| M54 | 1 | 0 | 0 | 1 |
| N28 | 1 | 0 | 0 | 1 |
| N32 | 1 | 0 | 0 | 1 |
| N82 | 1 | 0 | 0 | 1 |
| N85 | 0 | 1 | 0 | 1 |
| N86 | 1 | 0 | 0 | 1 |
| R14 | 0 | 1 | 0 | 1 |
| R19 | 1 | 0 | 0 | 1 |
| R25 | 0 | 1 | 0 | 1 |
| R30 | 0 | 1 | 0 | 1 |
| R32 | 1 | 0 | 0 | 1 |
| R35 | 1 | 0 | 0 | 1 |
| R42 | 0 | 1 | 0 | 1 |
| R51 | 1 | 0 | 0 | 1 |
| R73 | 1 | 0 | 0 | 1 |
| R94 | 1 | 0 | 0 | 1 |
| S30 | 1 | 0 | 0 | 1 |
| T17 | 1 | 0 | 0 | 1 |
| T19 | 1 | 0 | 0 | 1 |
| T24 | 1 | 0 | 0 | 1 |
| T45 | 0 | 1 | 0 | 1 |
| T91 | 1 | 0 | 0 | 1 |

additional complication analysis - see 'table' folder

-----  
30 day complication analysis  
-----

92246 eligible index spells with admission date  
505428 total episodes for patients with an eligible index spell  
101979 episodes on day of index spell or within 30 days  
92246 patients  
9255 episodes on day of index spell or within 30 days, not including index episodes  
7195 patients  
4850 unconfounded patients  
1485 TOT  
3255 TVT  
110 MS  
0 comb  
2345 confounded patients

785 TOT  
 1502 TVT  
 54 MS  
 4 comb  
 109 episodes on day zero (day of index admission)  
 8807 spells of admission within 30 days  
 5904 spells for unconfounded patients  
 1749 TOT  
 4025 TVT  
 130 MS  
 0 comb  
 2903 spells for confounded patients  
 930 TOT  
 1898 TVT  
 70 MS  
 5 comb  
 2180 thirty day episodes admitted for a complication  
 2082 spells  
 1876 patients  
 21 episodes on day zero (day of index admission)  
 1330 thirty day episodes admitted for complication following unconfounded operation:  
 326 episodes, 309 spells, 275 patients (TOT)  
 31 spells, 30 patients have re-intervention (TOT)  
 965 episodes, 931 spells, 833 patients (TVT)  
 144 spells, 141 patients have re-intervention (TVT)  
 39 episodes, 33 spells, 29 patients (MS)  
 0 spells, 0 patients have re-intervention (MS)  
 0 episodes, 0 spells, 0 patients (comb)  
 0 spells, 0 patients have re-intervention (comb)  
 850 thirty day episodes admitted for complication following confounded operation:  
 281 episodes, 268 spells, 250 patients (TOT)  
 22 spells, 22 patients have re-intervention (TOT)  
 557 episodes, 529 spells, 479 patients (TVT)  
 61 spells, 61 patients have re-intervention (TVT)  
 10 episodes, 10 spells, 9 patients (MS)  
 0 spells, 0 patients have re-intervention (MS)  
 2 episodes, 2 spells, 1 patients (comb)  
 1 spells, 1 patients have re-intervention (comb)

Complications in unconfounded operations

-----  
 All reported complications:

965 TVT  
 326 TOT  
 39 MS  
 0 comb

Complication code (no supplementary code):

| CompCode | TVT | TOT | MS | comb |
|----------|-----|-----|----|------|
| G97      | 3   | 4   | 0  | 0    |
| J95      | 0   | 2   | 0  | 0    |
| N99      | 31  | 11  | 0  | 0    |
| T81      | 78  | 26  | 6  | 0    |
| T82      | 1   | 0   | 0  | 0    |
| T83      | 69  | 17  | 4  | 0    |
| T84      | 0   | 1   | 1  | 0    |
| T85      | 3   | 5   | 0  | 0    |

Complication code (with supplementary code):

| CompCode | TVT | TOT | MS | comb |
|----------|-----|-----|----|------|
| K91      | 0   | 1   | 0  | 0    |
| N99      | 3   | 0   | 0  | 0    |
| T80      | 1   | 0   | 0  | 0    |
| T81      | 190 | 64  | 16 | 0    |
| T83      | 106 | 40  | 3  | 0    |
| T84      | 2   | 0   | 0  | 0    |
| T85      | 9   | 1   | 0  | 0    |
| T88      | 7   | 2   | 0  | 0    |

By main diagnosis code (with supplementary code):

| MainCode | TVT | TOT | MS | comb |
|----------|-----|-----|----|------|
| A40      | 1   | 0   | 0  | 0    |
| A41      | 1   | 0   | 0  | 0    |

|     |     |    |   |   |
|-----|-----|----|---|---|
| E10 | 2   | 0  | 0 | 0 |
| E86 | 1   | 0  | 0 | 0 |
| E87 | 1   | 0  | 0 | 0 |
| I26 | 1   | 0  | 0 | 0 |
| I42 | 1   | 0  | 0 | 0 |
| I74 | 1   | 0  | 0 | 0 |
| I80 | 0   | 1  | 0 | 0 |
| K22 | 1   | 0  | 0 | 0 |
| K52 | 1   | 0  | 0 | 0 |
| K59 | 7   | 2  | 0 | 0 |
| K65 | 0   | 0  | 1 | 0 |
| L03 | 3   | 0  | 0 | 0 |
| L27 | 1   | 0  | 0 | 0 |
| L53 | 1   | 0  | 0 | 0 |
| M25 | 0   | 1  | 0 | 0 |
| M54 | 0   | 1  | 0 | 0 |
| M62 | 0   | 1  | 0 | 0 |
| M72 | 0   | 2  | 0 | 0 |
| M79 | 1   | 8  | 0 | 0 |
| N12 | 3   | 0  | 0 | 0 |
| N30 | 1   | 0  | 0 | 0 |
| N35 | 1   | 0  | 0 | 0 |
| N39 | 32  | 9  | 2 | 0 |
| N76 | 2   | 0  | 0 | 0 |
| N81 | 1   | 0  | 0 | 0 |
| N89 | 4   | 5  | 0 | 0 |
| N90 | 2   | 0  | 0 | 0 |
| N93 | 9   | 6  | 0 | 0 |
| N94 | 1   | 2  | 0 | 0 |
| R03 | 1   | 0  | 0 | 0 |
| R07 | 1   | 1  | 0 | 0 |
| R10 | 46  | 14 | 0 | 0 |
| R11 | 8   | 0  | 0 | 0 |
| R14 | 1   | 0  | 0 | 0 |
| R18 | 0   | 1  | 0 | 0 |
| R29 | 1   | 0  | 0 | 0 |
| R30 | 2   | 4  | 0 | 0 |
| R31 | 9   | 2  | 1 | 0 |
| R32 | 4   | 4  | 0 | 0 |
| R33 | 255 | 77 | 5 | 0 |
| R35 | 5   | 0  | 0 | 0 |
| R39 | 37  | 6  | 0 | 0 |
| R50 | 1   | 0  | 0 | 0 |
| R52 | 1   | 0  | 0 | 0 |
| R55 | 1   | 0  | 0 | 0 |
| R69 | 0   | 1  | 0 | 0 |
| S30 | 1   | 0  | 0 | 0 |
| S31 | 1   | 0  | 0 | 0 |
| S37 | 1   | 0  | 0 | 0 |
| S70 | 0   | 1  | 0 | 0 |
| T37 | 0   | 1  | 0 | 0 |
| T39 | 1   | 0  | 0 | 0 |
| T78 | 1   | 0  | 0 | 0 |
| Z03 | 0   | 1  | 0 | 0 |
| Z45 | 1   | 0  | 0 | 0 |
| Z46 | 3   | 1  | 0 | 0 |

By supplementary code:

| SuppCode | TVT | TOT | MS | comb |
|----------|-----|-----|----|------|
| Y40      | 2   | 0   | 0  | 0    |
| Y41      | 3   | 1   | 0  | 0    |
| Y44      | 1   | 0   | 0  | 0    |
| Y45      | 2   | 1   | 0  | 0    |
| Y48      | 1   | 0   | 0  | 0    |
| Y49      | 2   | 0   | 0  | 0    |
| Y51      | 1   | 0   | 0  | 0    |
| Y53      | 0   | 1   | 0  | 0    |
| Y57      | 1   | 0   | 0  | 0    |
| Y60      | 3   | 0   | 0  | 0    |
| Y73      | 2   | 0   | 0  | 0    |
| Y76      | 5   | 3   | 0  | 0    |
| Y81      | 2   | 0   | 0  | 0    |
| Y83      | 728 | 236 | 26 | 0    |

Y84 27 18 2 0

By type of complication:

357 spells with procedure complication ( 381 complications)

253 TVT

86 TOT

18 MS

0 combinations

319 spells with device complication ( 332 complications)

233 TVT

81 TOT

5 MS

0 combinations

445 spells with complication with urinary symptoms ( 454 complications)

340 TVT

99 TOT

6 MS

0 combinations

217 spells with other complication

151 TVT

60 TOT

6 MS

0 combinations

Most common complications:

Complication code (with or without supplementary code):

| CompCode | TVT | TOT | MS | sum |
|----------|-----|-----|----|-----|
| T81      | 268 | 90  | 22 | 380 |
| T83      | 175 | 57  | 7  | 239 |
| N99      | 34  | 11  | 0  | 45  |
| T85      | 12  | 6   | 0  | 18  |
| T88      | 7   | 2   | 0  | 9   |
| G97      | 3   | 4   | 0  | 7   |
| T84      | 2   | 1   | 1  | 4   |
| J95      | 0   | 2   | 0  | 2   |
| K91      | 0   | 1   | 0  | 1   |
| T80      | 1   | 0   | 0  | 1   |
| T82      | 1   | 0   | 0  | 1   |

Main code (with supplementary code):

| MainCode | TVT | TOT | MS | sum |
|----------|-----|-----|----|-----|
| R33      | 255 | 77  | 5  | 337 |
| R10      | 46  | 14  | 0  | 60  |
| N39      | 32  | 9   | 2  | 43  |
| R39      | 37  | 6   | 0  | 43  |
| N93      | 9   | 6   | 0  | 15  |
| R31      | 9   | 2   | 1  | 12  |
| K59      | 7   | 2   | 0  | 9   |
| M79      | 1   | 8   | 0  | 9   |
| N89      | 4   | 5   | 0  | 9   |
| R11      | 8   | 0   | 0  | 8   |
| R32      | 4   | 4   | 0  | 8   |
| R30      | 2   | 4   | 0  | 6   |
| R35      | 5   | 0   | 0  | 5   |
| Z46      | 3   | 1   | 0  | 4   |
| L03      | 3   | 0   | 0  | 3   |
| N12      | 3   | 0   | 0  | 3   |
| N94      | 1   | 2   | 0  | 3   |
| E10      | 2   | 0   | 0  | 2   |
| M72      | 0   | 2   | 0  | 2   |
| N76      | 2   | 0   | 0  | 2   |
| N90      | 2   | 0   | 0  | 2   |
| R07      | 1   | 1   | 0  | 2   |
| A40      | 1   | 0   | 0  | 1   |
| A41      | 1   | 0   | 0  | 1   |
| E86      | 1   | 0   | 0  | 1   |
| E87      | 1   | 0   | 0  | 1   |
| I26      | 1   | 0   | 0  | 1   |
| I42      | 1   | 0   | 0  | 1   |
| I74      | 1   | 0   | 0  | 1   |
| I80      | 0   | 1   | 0  | 1   |
| K22      | 1   | 0   | 0  | 1   |
| K52      | 1   | 0   | 0  | 1   |

|     |   |   |   |   |
|-----|---|---|---|---|
| K65 | 0 | 0 | 1 | 1 |
| L27 | 1 | 0 | 0 | 1 |
| L53 | 1 | 0 | 0 | 1 |
| M25 | 0 | 1 | 0 | 1 |
| M54 | 0 | 1 | 0 | 1 |
| M62 | 0 | 1 | 0 | 1 |
| N30 | 1 | 0 | 0 | 1 |
| N35 | 1 | 0 | 0 | 1 |
| N81 | 1 | 0 | 0 | 1 |
| R03 | 1 | 0 | 0 | 1 |
| R14 | 1 | 0 | 0 | 1 |
| R18 | 0 | 1 | 0 | 1 |
| R29 | 1 | 0 | 0 | 1 |
| R50 | 1 | 0 | 0 | 1 |
| R52 | 1 | 0 | 0 | 1 |
| R55 | 1 | 0 | 0 | 1 |
| R69 | 0 | 1 | 0 | 1 |
| S30 | 1 | 0 | 0 | 1 |
| S31 | 1 | 0 | 0 | 1 |
| S37 | 1 | 0 | 0 | 1 |
| S70 | 0 | 1 | 0 | 1 |
| T37 | 0 | 1 | 0 | 1 |
| T39 | 1 | 0 | 0 | 1 |
| T78 | 1 | 0 | 0 | 1 |
| Z03 | 0 | 1 | 0 | 1 |
| Z45 | 1 | 0 | 0 | 1 |

Complication code (with or without supplementary code) in 'other' group:

| CompCode | TVT | TOT | MS | sum |
|----------|-----|-----|----|-----|
| T83      | 31  | 10  | 3  | 44  |
| G97      | 3   | 4   | 0  | 7   |
| T88      | 6   | 1   | 0  | 7   |
| J95      | 0   | 2   | 0  | 2   |
| N99      | 1   | 1   | 0  | 2   |
| T84      | 0   | 1   | 1  | 2   |
| K91      | 0   | 1   | 0  | 1   |
| T80      | 1   | 0   | 0  | 1   |
| T82      | 1   | 0   | 0  | 1   |

Main code (with supplementary code) in 'other' group:

| MainCode | TVT | TOT | MS | sum |
|----------|-----|-----|----|-----|
| R10      | 33  | 10  | 0  | 43  |
| N39      | 27  | 8   | 2  | 37  |
| N89      | 4   | 4   | 0  | 8   |
| N93      | 6   | 2   | 0  | 8   |
| M79      | 0   | 7   | 0  | 7   |
| R11      | 7   | 0   | 0  | 7   |
| K59      | 4   | 2   | 0  | 6   |
| Z46      | 3   | 1   | 0  | 4   |
| N12      | 3   | 0   | 0  | 3   |
| E10      | 2   | 0   | 0  | 2   |
| L03      | 2   | 0   | 0  | 2   |
| M72      | 0   | 2   | 0  | 2   |
| N76      | 2   | 0   | 0  | 2   |
| R07      | 1   | 1   | 0  | 2   |
| A41      | 1   | 0   | 0  | 1   |
| E86      | 1   | 0   | 0  | 1   |
| E87      | 1   | 0   | 0  | 1   |
| I26      | 1   | 0   | 0  | 1   |
| I42      | 1   | 0   | 0  | 1   |
| I74      | 1   | 0   | 0  | 1   |
| K22      | 1   | 0   | 0  | 1   |
| K52      | 1   | 0   | 0  | 1   |
| L27      | 1   | 0   | 0  | 1   |
| L53      | 1   | 0   | 0  | 1   |
| M25      | 0   | 1   | 0  | 1   |
| M54      | 0   | 1   | 0  | 1   |
| M62      | 0   | 1   | 0  | 1   |
| N81      | 1   | 0   | 0  | 1   |
| N90      | 1   | 0   | 0  | 1   |
| N94      | 1   | 0   | 0  | 1   |
| R14      | 1   | 0   | 0  | 1   |
| R18      | 0   | 1   | 0  | 1   |

|     |   |   |   |   |
|-----|---|---|---|---|
| R29 | 1 | 0 | 0 | 1 |
| R50 | 1 | 0 | 0 | 1 |
| R52 | 1 | 0 | 0 | 1 |
| R55 | 1 | 0 | 0 | 1 |
| R69 | 0 | 1 | 0 | 1 |
| S30 | 1 | 0 | 0 | 1 |
| S70 | 0 | 1 | 0 | 1 |
| T37 | 0 | 1 | 0 | 1 |
| T39 | 1 | 0 | 0 | 1 |
| T78 | 1 | 0 | 0 | 1 |
| Z03 | 0 | 1 | 0 | 1 |

Complications in confounded operations

-----  
All reported complications:

557 TVT  
281 TOT  
10 MS  
2 comb

Complication code (no supplementary code):

| CompCode | TVT | TOT | MS | comb |
|----------|-----|-----|----|------|
| G97      | 4   | 2   | 0  | 0    |
| N99      | 17  | 4   | 0  | 0    |
| T81      | 61  | 34  | 3  | 0    |
| T83      | 31  | 16  | 0  | 0    |
| T84      | 0   | 2   | 0  | 0    |
| T85      | 0   | 1   | 0  | 0    |
| T88      | 1   | 0   | 0  | 0    |

Complication code (with supplementary code):

| CompCode | TVT | TOT | MS | comb |
|----------|-----|-----|----|------|
| G97      | 0   | 1   | 0  | 0    |
| N99      | 1   | 0   | 0  | 0    |
| T81      | 210 | 117 | 3  | 0    |
| T82      | 1   | 0   | 0  | 0    |
| T83      | 41  | 19  | 2  | 0    |
| T84      | 0   | 1   | 0  | 0    |
| T85      | 4   | 1   | 0  | 0    |
| T88      | 3   | 2   | 0  | 0    |

By main diagnosis code (with supplementary code):

| MainCode | TVT | TOT | MS | comb |
|----------|-----|-----|----|------|
| D64      | 1   | 0   | 0  | 0    |
| G58      | 1   | 1   | 0  | 0    |
| H91      | 1   | 0   | 0  | 0    |
| I21      | 1   | 0   | 0  | 0    |
| I80      | 0   | 1   | 0  | 0    |
| J18      | 1   | 0   | 0  | 0    |
| J98      | 1   | 0   | 0  | 0    |
| K43      | 0   | 1   | 0  | 0    |
| K52      | 0   | 1   | 0  | 0    |
| K56      | 2   | 0   | 0  | 0    |
| K59      | 6   | 2   | 0  | 0    |
| K62      | 3   | 0   | 0  | 0    |
| L03      | 2   | 0   | 0  | 0    |
| M25      | 0   | 1   | 0  | 0    |
| M54      | 0   | 1   | 0  | 0    |
| M79      | 1   | 4   | 0  | 0    |
| N12      | 1   | 0   | 0  | 0    |
| N31      | 2   | 0   | 0  | 0    |
| N32      | 1   | 1   | 0  | 0    |
| N35      | 1   | 0   | 0  | 0    |
| N39      | 19  | 5   | 0  | 0    |
| N73      | 4   | 0   | 0  | 0    |
| N76      | 1   | 0   | 0  | 0    |
| N82      | 0   | 1   | 0  | 0    |
| N89      | 4   | 2   | 0  | 0    |
| N93      | 13  | 4   | 0  | 0    |
| N94      | 0   | 2   | 0  | 0    |
| R10      | 9   | 8   | 0  | 0    |
| R18      | 1   | 0   | 0  | 0    |
| R21      | 1   | 0   | 0  | 0    |

|     |    |    |   |   |
|-----|----|----|---|---|
| R30 | 3  | 0  | 0 | 0 |
| R31 | 0  | 0  | 1 | 0 |
| R32 | 2  | 0  | 0 | 0 |
| R33 | 83 | 42 | 1 | 2 |
| R39 | 13 | 2  | 0 | 0 |
| R51 | 0  | 1  | 0 | 0 |
| R53 | 1  | 0  | 0 | 0 |
| R94 | 1  | 0  | 0 | 0 |
| S34 | 1  | 0  | 0 | 0 |
| Z46 | 2  | 1  | 0 | 0 |

By supplementary code:

| SuppCode | TVT | TOT | MS | comb |
|----------|-----|-----|----|------|
| Y40      | 0   | 1   | 0  | 0    |
| Y41      | 1   | 0   | 0  | 0    |
| Y44      | 2   | 0   | 0  | 0    |
| Y48      | 0   | 1   | 0  | 0    |
| Y51      | 1   | 0   | 0  | 0    |
| Y82      | 1   | 0   | 0  | 0    |
| Y83      | 423 | 215 | 7  | 2    |
| Y84      | 15  | 5   | 0  | 0    |

By type of complication:

407 spells with procedure complication ( 428 complications)  
 256 TVT  
 145 TOT  
 6 MS  
 0 combinations

132 spells with device complication ( 138 complications)  
 89 TVT  
 42 TOT  
 1 MS  
 0 combinations

163 spells with complication with urinary symptoms ( 169 complications)  
 112 TVT  
 47 TOT  
 2 MS  
 2 combinations

139 spells with other complication  
 93 TVT  
 44 TOT  
 2 MS  
 0 combinations

Most common complications:

Complication code (with or without supplementary code):

| CompCode | TVT | TOT | MS | sum |
|----------|-----|-----|----|-----|
| T81      | 271 | 151 | 6  | 428 |
| T83      | 72  | 35  | 2  | 109 |
| N99      | 18  | 4   | 0  | 22  |
| G97      | 4   | 3   | 0  | 7   |
| T85      | 4   | 2   | 0  | 6   |
| T88      | 4   | 2   | 0  | 6   |
| T84      | 0   | 3   | 0  | 3   |
| T82      | 1   | 0   | 0  | 1   |

Main code (with supplementary code):

| MainCode | TVT | TOT | MS | sum |
|----------|-----|-----|----|-----|
| R33      | 83  | 42  | 1  | 126 |
| N39      | 19  | 5   | 0  | 24  |
| N93      | 13  | 4   | 0  | 17  |
| R10      | 9   | 8   | 0  | 17  |
| R39      | 13  | 2   | 0  | 15  |
| K59      | 6   | 2   | 0  | 8   |
| N89      | 4   | 2   | 0  | 6   |
| M79      | 1   | 4   | 0  | 5   |
| N73      | 4   | 0   | 0  | 4   |
| K62      | 3   | 0   | 0  | 3   |
| R30      | 3   | 0   | 0  | 3   |
| Z46      | 2   | 1   | 0  | 3   |
| G58      | 1   | 1   | 0  | 2   |
| K56      | 2   | 0   | 0  | 2   |
| L03      | 2   | 0   | 0  | 2   |



|     |   |   |   |   |
|-----|---|---|---|---|
| N31 | 2 | 0 | 0 | 2 |
| N32 | 1 | 1 | 0 | 2 |
| N94 | 0 | 2 | 0 | 2 |
| R32 | 2 | 0 | 0 | 2 |
| D64 | 1 | 0 | 0 | 1 |
| H91 | 1 | 0 | 0 | 1 |
| I21 | 1 | 0 | 0 | 1 |
| I80 | 0 | 1 | 0 | 1 |
| J18 | 1 | 0 | 0 | 1 |
| J98 | 1 | 0 | 0 | 1 |
| K43 | 0 | 1 | 0 | 1 |
| K52 | 0 | 1 | 0 | 1 |
| M25 | 0 | 1 | 0 | 1 |
| M54 | 0 | 1 | 0 | 1 |
| N12 | 1 | 0 | 0 | 1 |
| N35 | 1 | 0 | 0 | 1 |
| N76 | 1 | 0 | 0 | 1 |
| N82 | 0 | 1 | 0 | 1 |
| R18 | 1 | 0 | 0 | 1 |
| R21 | 1 | 0 | 0 | 1 |
| R31 | 0 | 0 | 1 | 1 |
| R51 | 0 | 1 | 0 | 1 |
| R53 | 1 | 0 | 0 | 1 |
| R94 | 1 | 0 | 0 | 1 |
| S34 | 1 | 0 | 0 | 1 |

30 day admissions without complication

-----  
6725 thirty day spells without admission for complication  
5651 patients  
7037 episodes

30 day readmissions with no complication - whole cohort:

-----  
7037 thirty day episodes  
6725 spells  
5651 patients  
2911 thirty day episodes with catheter-related procedures  
2910 spells involving (but not limited to) catheter procedures  
285 thirty day episodes with mesh-related re-interventions  
285 spells involving (but not limited to) mesh re-interventions  
2436 thirty day episodes with no procedure  
2157 spells with no procedure  
2963 episodes with no confounding procedure  
2658 spells no confounding procedure  
501 spells with procedures but no confounding procedures

30 day readmissions with no complication - unconfounded cohort:

-----  
4822 thirty day episodes  
4631 spells  
3922 patients  
1966 thirty day episodes with catheter-related procedures  
1965 spells involving (but not limited to) catheter procedures  
203 thirty day episodes with mesh-related re-interventions  
203 spells involving (but not limited to) mesh re-interventions  
1587 thirty day episodes with no procedure  
1415 spells with no procedure  
1971 episodes with no confounding procedure  
1783 spells no confounding procedure  
368 spells with procedures but no confounding procedures

30 day readmissions with no complication - unconfounded TVT:

-----  
3208 thirty day episodes  
3094 spells  
2580 patients  
1369 thirty day episodes with catheter-related procedures  
1369 spells involving (but not limited to) catheter procedures  
138 thirty day episodes with mesh-related re-interventions  
138 spells involving (but not limited to) mesh re-interventions  
1072 thirty day episodes with no procedure

970 spells with no procedure  
 1295 episodes with no confounding procedure  
   1182 spells no confounding procedure  
   212 spells with procedures but no confounding procedures

30 day readmissions with no complication - unconfounded TOT:  
 -----

1514 thirty day episodes  
   1440 spells  
   1257 patients  
 547 thirty day episodes with catheter-related procedures  
   546 spells involving (but not limited to) catheter procedures  
 62 thirty day episodes with mesh-related re-interventions  
   62 spells involving (but not limited to) mesh re-interventions  
 485 thirty day episodes with no procedure  
   417 spells with no procedure  
 638 episodes with no confounding procedure  
   566 spells no confounding procedure  
   149 spells with procedures but no confounding procedures

30 day readmissions with no complication - unconfounded MS:  
 -----

100 thirty day episodes  
   97 spells  
   85 patients  
 50 thirty day episodes with catheter-related procedures  
   50 spells involving (but not limited to) catheter procedures  
 3 thirty day episodes with mesh-related re-interventions  
   3 spells involving (but not limited to) mesh re-interventions  
 30 thirty day episodes with no procedure  
   28 spells with no procedure  
 38 episodes with no confounding procedure  
   35 spells no confounding procedure  
   7 spells with procedures but no confounding procedures

30 day readmissions with no complication - confounded cohort:  
 -----

2215 thirty day episodes  
   2094 spells  
   1729 patients  
 945 thirty day episodes with catheter-related procedures  
   945 spells involving (but not limited to) catheter procedures  
 82 thirty day episodes with mesh-related re-interventions  
   82 spells involving (but not limited to) mesh re-interventions  
 849 thirty day episodes with no procedure  
   742 spells with no procedure  
 992 episodes with no confounding procedure  
   875 spells no confounding procedure  
   133 spells with procedures but no confounding procedures

30 day readmissions with no complication - confounded TVT:  
 -----

1454 thirty day episodes  
   1369 spells  
   1102 patients  
 633 thirty day episodes with catheter-related procedures  
   633 spells involving (but not limited to) catheter procedures  
 58 thirty day episodes with mesh-related re-interventions  
   58 spells involving (but not limited to) mesh re-interventions  
 550 thirty day episodes with no procedure  
   476 spells with no procedure  
 639 episodes with no confounding procedure  
   557 spells no confounding procedure  
   81 spells with procedures but no confounding procedures

30 day readmissions with no complication - confounded TOT:  
 -----

695 thirty day episodes  
   662 spells  
   578 patients  
 276 thirty day episodes with catheter-related procedures  
   276 spells involving (but not limited to) catheter procedures  
 23 thirty day episodes with mesh-related re-interventions

23 spells involving (but not limited to) mesh re-interventions  
278 thirty day episodes with no procedure  
247 spells with no procedure  
328 episodes with no confounding procedure  
296 spells no confounding procedure  
49 spells with procedures but no confounding procedures

30 day readmissions with no complication - confounded MS:

-----  
63 thirty day episodes  
60 spells  
46 patients  
33 thirty day episodes with catheter-related procedures  
33 spells involving (but not limited to) catheter procedures  
1 thirty day episodes with mesh-related re-interventions  
1 spells involving (but not limited to) mesh re-interventions  
21 thirty day episodes with no procedure  
19 spells with no procedure  
25 episodes with no confounding procedure  
22 spells no confounding procedure  
3 spells with procedures but no confounding procedures

-----  
Post-procedural analysis  
-----

Counting episodes pre- and post- index

-----  
561631 total episodes  
101364 episodes in index spells  
193330 episodes before index spells  
266937 episodes after index spells

In-hospital deaths

-----  
918 in-hospital death episodes  
860 in-hospital death spells  
767 in-hospital death spells for SUI cohort  
0 patients died before index procedure  
1 duplicated PSEUDO\_HESID in death events  
766 in-hospital death spells  
766 different patients  
3 in-hospital death spells within 30 days  
3 different patients  
2 in-hospital death spells within 30 days (unconfounded cohort)  
2 different patients (unconfounded cohort)

Patients who survived to the end of study

-----  
91480 patients alive at end of study period  
0 patients who were in both dead and alive cohorts  
92246 patients in SUI cohort with index procedure  
142234241 total follow-up (days)  
1541.9 days mean follow-up

Admissions due to relevant symptoms

-----  
10386 episodes admitted for pain  
1324 episodes admitted for abnormal bleeding  
4025 episodes admitted for previous procedural complication  
3822 episodes admitted for previous complication of devices  
  
3775 spells with admission for relevant symptoms (device complications only)  
3194 spells admitted for relevant symptoms in SUI cohort  
92 spells admitted for relevant symptoms before index procedure  
3102 spells admitted for relevant symptoms after index procedure  
13 spells admitted for relevant symptoms which are also index episodes - removed  
264 spells admitted for relevant symptoms which are 30 day complication episodes - removed  
2825 qualifying spells admitted for relevant symptoms for analysis

1 spells for pain; 1 patients  
0 spells for bleeding; 0 patients

0 spells for previous complication; 0 patients  
2825 spells for previous device complication; 2181 patients

Admissions with pain (in any field)

-----  
21924 episodes admitted with pain ( R100 R101 R102 R103 R104 R10X N930 N938 N939 N93X N941 M726 K613 )  
20169 spells with admission with pain  
18273 spells admitted with pain in SUI cohort  
8423 spells admitted with pain before index procedure  
9850 spells admitted with pain after index procedure  
593 spells admitted with pain which are also index episodes - removed  
147 spells admitted with pain which are 30 day complication episodes - removed  
9110 qualifying spells admitted with pain for analysis  
7846 spells with abdo+pelvic pain (R10); 5719 patients  
793 spells with vaginal bleeding (N93); 742 patients  
455 spells with dyspareunia (N94); 421 patients  
6 spells with necrotising fasciitis (M72.6); 5 patients  
10 spells with ischiorectal abscess (K61.3); 8 patients

Admissions including re-intervention

-----  
107357 episodes including SUI mesh intervention  
107341 spells with SUI mesh intervention  
97898 spells with SUI mesh intervention in SUI cohort  
0 spells with intervention for SUI mesh before index procedure  
97898 spells with SUI intervention remaining  
92246 spells with SUI intervention which are also index episodes - removed  
260 spells admitted for intervention which are 30 day complication spells - removed  
5392 qualifying spells admitted with SUI intervention for analysis  
    1980 introductions  
    968 repairs  
    2607 removals  
    8 renewals

draw example history figure

-----  
see figures/history.pdf

Unconfounded cohort

-----  
68002 patients in cohort  
552 died in hospital  
67450 alive at end of study  
2008 spells due to relevant symptoms  
3886 spells with SUI mesh intervention  
68002 patients in SUI cohort with index procedure  
104561376 total follow-up (days), 286273.4 years  
1537.6 days mean follow-up, 4.2 years  
1574 days median follow-up, 4.3 years  
    90.17 % followed up for > 1 year(s)  
    78.39 % followed up for > 2 year(s)  
    66.48 % followed up for > 3 year(s)  
    53.77 % followed up for > 4 year(s)  
    40.89 % followed up for > 5 year(s)  
    27.53 % followed up for > 6 year(s)  
    13.59 % followed up for > 7 year(s)  
    0.01 % followed up for > 8 year(s)

Relevant symptom events:

70010 total events  
68002 unique patients  
2008 admissions for symptom events  
7.01 per 1000 person years crude IR  
1541 unique patients

Distribution of admissions for relevant symptoms:

| n | freq  |
|---|-------|
| 0 | 66461 |
| 1 | 1178  |
| 2 | 283   |
| 3 | 60    |
| 4 | 17    |
| 5 | 2     |

```

6      1
Breakdown of admissions for symptoms:
  0 pain ( 0 patients)
  0 bleeding ( 0 patients)
  0 complication ( 0 patients)
  2008 device ( 1541 patients)

Further SUI interventions:
71888 total events
68002 unique patients
3886 admissions for reintervention events
13.57 per 1000 person years crude IR
3213 unique patients
Distribution of admissions for further mesh interventions:
  n  freq
  0 64789
  1 2674
  2  430
  3   89
  4   16
  5    3
  6    1
Breakdown of further mesh interventions:
  1486 introductions ( 1451 patients)
  705 repairs ( 657 patients)
  1829 removals ( 1608 patients)
  6 renewals ( 6 patients)

Cross-tabulation of symptoms and re-intervention:
      Reop
Symptoms  0      1
  0 64461 2000
  1   329 1212

Re-intervention or symptoms event analysis:
4575 admissions for relevant events (in unique spells)
3542 patients
15.98 per 1000 person years crude IR
Distribution of admissions for relevant events:
  n  freq
  0 64460
  1 2788
  2  553
  3  146
  4   37
  5   13
  6    5

First relevant symptoms event analysis:
2008 events after first event (e.g. censor after first admission for relevant symptoms)
68002 first events
68002 unique patients
1541 rows with symptom event
14 rows with time=0 -> 0.5
0 events with time=0 -> 0.5
NA ( NA to NA ) years, 95% survival
0.974 ( 0.973 to 0.976 ) 5 year survival probability

First re-intervention event analysis:
3886 events after first event (e.g. censor after re-intervention)
68002 first events
68002 unique patients
3212 rows with re-intervention event
31 rows with time=0 -> 0.5
17 events with time=0 -> 0.5
4.2 ( 3.91 to 4.64 ) years, 95% survival
0.946 ( 0.944 to 0.948 ) 5 year survival probability

First relevant event survival analysis:
4575 events after first event (e.g. censor after first symptoms or re-intervention)
68002 first events
68002 unique patients
3541 rows with symptoms or re-intervention event

```

31 rows with time=0 -> 0.5  
17 events with time=0 -> 0.5  
3.28 ( 2.9 to 3.7 ) years, 95% survival  
0.941 ( 0.939 to 0.943 ) 5 year survival probability

Unconfounded TVT, TOT or MS

-----  
68002 patients in cohort  
552 died in hospital  
67450 alive at end of study  
2008 spells due to relevant symptoms  
3886 spells with SUI mesh intervention  
68002 patients in SUI cohort with index procedure  
104561376 total follow-up (days), 286273.4 years  
1537.6 days mean follow-up, 4.2 years  
1574 days median follow-up, 4.3 years  
90.17 % followed up for > 1 year(s)  
78.39 % followed up for > 2 year(s)  
66.48 % followed up for > 3 year(s)  
53.77 % followed up for > 4 year(s)  
40.89 % followed up for > 5 year(s)  
27.53 % followed up for > 6 year(s)  
13.59 % followed up for > 7 year(s)  
0.01 % followed up for > 8 year(s)

Relevant symptom events:

70010 total events  
68002 unique patients  
2008 admissions for symptom events  
7.01 per 1000 person years crude IR  
1541 unique patients

Distribution of admissions for relevant symptoms:

| n | freq  |
|---|-------|
| 0 | 66461 |
| 1 | 1178  |
| 2 | 283   |
| 3 | 60    |
| 4 | 17    |
| 5 | 2     |
| 6 | 1     |

Breakdown of admissions for symptoms:

0 pain ( 0 patients)  
0 bleeding ( 0 patients)  
0 complication ( 0 patients)  
2008 device ( 1541 patients)

Further SUI interventions:

71888 total events  
68002 unique patients  
3886 admissions for reintervention events  
13.57 per 1000 person years crude IR  
3213 unique patients

Distribution of admissions for further mesh interventions:

| n | freq  |
|---|-------|
| 0 | 64789 |
| 1 | 2674  |
| 2 | 430   |
| 3 | 89    |
| 4 | 16    |
| 5 | 3     |
| 6 | 1     |

Breakdown of further mesh interventions:

1486 introductions ( 1451 patients)  
705 repairs ( 657 patients)  
1829 removals ( 1608 patients)  
6 renewals ( 6 patients)

Cross-tabulation of symptoms and re-intervention:

|          | Reop  |      |
|----------|-------|------|
| Symptoms | 0     | 1    |
| 0        | 64461 | 2000 |
| 1        | 329   | 1212 |

Re-intervention or symptoms event analysis:

4575 admissions for relevant events (in unique spells)  
3542 patients  
15.98 per 1000 person years crude IR  
Distribution of admissions for relevant events:

| n | freq  |
|---|-------|
| 0 | 64460 |
| 1 | 2788  |
| 2 | 553   |
| 3 | 146   |
| 4 | 37    |
| 5 | 13    |
| 6 | 5     |

First relevant symptoms event analysis:

2008 events after first event (e.g. censor after first admission for relevant symptoms)  
68002 first events  
68002 unique patients  
1541 rows with symptom event  
14 rows with time=0 -> 0.5  
0 events with time=0 -> 0.5  
NA ( NA to NA ) years, 95% survival  
0.974 ( 0.973 to 0.976 ) 5 year survival probability

First re-intervention event analysis:

3886 events after first event (e.g. censor after re-intervention)  
68002 first events  
68002 unique patients  
3212 rows with re-intervention event  
31 rows with time=0 -> 0.5  
17 events with time=0 -> 0.5  
4.2 ( 3.91 to 4.64 ) years, 95% survival  
0.946 ( 0.944 to 0.948 ) 5 year survival probability

First relevant event survival analysis:

4575 events after first event (e.g. censor after first symptoms or re-intervention)  
68002 first events  
68002 unique patients  
3541 rows with symptoms or re-intervention event  
31 rows with time=0 -> 0.5  
17 events with time=0 -> 0.5  
3.28 ( 2.9 to 3.7 ) years, 95% survival  
0.941 ( 0.939 to 0.943 ) 5 year survival probability

Unconfounded TVT cohort

-----

41880 patients in cohort  
345 died in hospital  
41535 alive at end of study  
1389 spells due to relevant symptoms  
2476 spells with SUI mesh intervention  
41880 patients in SUI cohort with index procedure  
64022335 total follow-up (days), 175283.6 years  
1528.7 days mean follow-up, 4.2 years  
1541 days median follow-up, 4.2 years  
89.79 % followed up for > 1 year(s)  
77.91 % followed up for > 2 year(s)  
65.81 % followed up for > 3 year(s)  
52.97 % followed up for > 4 year(s)  
40.5 % followed up for > 5 year(s)  
27.44 % followed up for > 6 year(s)  
13.91 % followed up for > 7 year(s)  
0.01 % followed up for > 8 year(s)

Relevant symptom events:

43269 total events  
41880 unique patients  
1389 admissions for symptom events  
7.92 per 1000 person years crude IR  
1047 unique patients  
Distribution of admissions for relevant symptoms:

| n | freq  |
|---|-------|
| 0 | 40833 |

1 779  
2 211  
3 42  
4 14  
6 1

Breakdown of admissions for symptoms:

0 pain ( 0 patients)  
0 bleeding ( 0 patients)  
0 complication ( 0 patients)  
1389 device ( 1047 patients)

Further SUI interventions:

44356 total events  
41880 unique patients  
2476 admissions for reintervention events  
14.13 per 1000 person years crude IR  
2016 unique patients

Distribution of admissions for further mesh interventions:

n freq  
0 39864  
1 1647  
2 294  
3 63  
4 9  
5 2  
6 1

Breakdown of further mesh interventions:

831 introductions ( 812 patients)  
459 repairs ( 425 patients)  
1277 removals ( 1112 patients)  
5 renewals ( 5 patients)

Cross-tabulation of symptoms and re-intervention:

|          | Reop  |      |
|----------|-------|------|
| Symptoms | 0     | 1    |
| 0        | 39633 | 1200 |
| 1        | 232   | 815  |

Re-intervention or symptoms event analysis:

2950 admissions for relevant events (in unique spells)  
2248 patients  
16.83 per 1000 person years crude IR  
Distribution of admissions for relevant events:  
n freq  
0 39632  
1 1737  
2 375  
3 98  
4 25  
5 9  
6 4

First relevant symptoms event analysis:

1389 events after first event (e.g. censor after first admission for relevant symptoms)  
41880 first events  
41880 unique patients  
1047 rows with symptom event  
9 rows with time=0 -> 0.5  
0 events with time=0 -> 0.5  
NA ( NA to NA ) years, 95% survival  
0.972 ( 0.97 to 0.974 ) 5 year survival probability

First re-intervention event analysis:

2476 events after first event (e.g. censor after re-intervention)  
41880 first events  
41880 unique patients  
2015 rows with re-intervention event  
17 rows with time=0 -> 0.5  
8 events with time=0 -> 0.5  
4 ( 3.47 to 4.45 ) years, 95% survival  
0.945 ( 0.943 to 0.948 ) 5 year survival probability

First relevant event survival analysis:



2950 events after first event (e.g. censor after first symptoms or re-intervention)  
41880 first events  
41880 unique patients  
2247 rows with symptoms or re-intervention event  
17 rows with time=0 -> 0.5  
8 events with time=0 -> 0.5  
2.65 ( 2.32 to 3.22 ) years, 95% survival  
0.939 ( 0.937 to 0.942 ) 5 year survival probability

Unconfounded TOT cohort

-----  
25509 patients in cohort  
204 died in hospital  
25305 alive at end of study  
607 spells due to relevant symptoms  
1370 spells with SUI mesh intervention  
25509 patients in SUI cohort with index procedure  
39570960 total follow-up (days), 108339.4 years  
1551.3 days mean follow-up, 4.2 years  
1607 days median follow-up, 4.4 years  
90.77 % followed up for > 1 year(s)  
79.26 % followed up for > 2 year(s)  
67.62 % followed up for > 3 year(s)  
55.07 % followed up for > 4 year(s)  
41.44 % followed up for > 5 year(s)  
27.55 % followed up for > 6 year(s)  
12.92 % followed up for > 7 year(s)  
0 % followed up for > 8 year(s)

Relevant symptom events:

26116 total events  
25509 unique patients  
607 admissions for symptom events  
5.6 per 1000 person years crude IR  
484 unique patients

Distribution of admissions for relevant symptoms:

| n | freq  |
|---|-------|
| 0 | 25025 |
| 1 | 390   |
| 2 | 72    |
| 3 | 17    |
| 4 | 3     |
| 5 | 2     |

Breakdown of admissions for symptoms:

0 pain ( 0 patients)  
0 bleeding ( 0 patients)  
0 complication ( 0 patients)  
607 device ( 484 patients)

Further SUI interventions:

26879 total events  
25509 unique patients  
1370 admissions for reintervention events  
12.65 per 1000 person years crude IR  
1161 unique patients

Distribution of admissions for further mesh interventions:

| n | freq  |
|---|-------|
| 0 | 24348 |
| 1 | 995   |
| 2 | 132   |
| 3 | 26    |
| 4 | 7     |
| 5 | 1     |

Breakdown of further mesh interventions:

630 introductions ( 615 patients)  
240 repairs ( 227 patients)  
541 removals ( 486 patients)  
1 renewals ( 1 patients)

Cross-tabulation of symptoms and re-intervention:

|          | Reop    |     |
|----------|---------|-----|
| Symptoms | 0       | 1   |
|          | 0 24254 | 771 |

Re-intervention or symptoms event analysis:

1580 admissions for relevant events (in unique spells)  
 1255 patients  
 14.58 per 1000 person years crude IR  
 Distribution of admissions for relevant events:

| n | freq  |
|---|-------|
| 0 | 24254 |
| 1 | 1017  |
| 2 | 174   |
| 3 | 47    |
| 4 | 12    |
| 5 | 4     |
| 6 | 1     |

First relevant symptoms event analysis:

607 events after first event (e.g. censor after first admission for relevant symptoms)  
 25509 first events  
 25509 unique patients  
 484 rows with symptom event  
 5 rows with time=0 -> 0.5  
 0 events with time=0 -> 0.5  
 NA ( NA to NA ) years, 95% survival  
 0.978 ( 0.976 to 0.98 ) 5 year survival probability

First re-intervention event analysis:

1370 events after first event (e.g. censor after re-intervention)  
 25509 first events  
 25509 unique patients  
 1161 rows with re-intervention event  
 13 rows with time=0 -> 0.5  
 8 events with time=0 -> 0.5  
 4.75 ( 4.07 to 5.3 ) years, 95% survival  
 0.948 ( 0.945 to 0.952 ) 5 year survival probability

First relevant event survival analysis:

1580 events after first event (e.g. censor after first symptoms or re-intervention)  
 25509 first events  
 25509 unique patients  
 1255 rows with symptoms or re-intervention event  
 13 rows with time=0 -> 0.5  
 8 events with time=0 -> 0.5  
 4 ( 3.58 to 4.6 ) years, 95% survival  
 0.944 ( 0.941 to 0.948 ) 5 year survival probability

Unconfounded minisling cohort

-----  
 613 patients in cohort  
 3 died in hospital  
 610 alive at end of study  
 12 spells due to relevant symptoms  
 40 spells with SUI mesh intervention  
 613 patients in SUI cohort with index procedure  
 968081 total follow-up (days), 2650.461 years  
 1579.3 days mean follow-up, 4.3 years  
 1644 days median follow-up, 4.5 years  
 91.03 % followed up for > 1 year(s)  
 75.2 % followed up for > 2 year(s)  
 64.44 % followed up for > 3 year(s)  
 54.65 % followed up for > 4 year(s)  
 44.7 % followed up for > 5 year(s)  
 32.79 % followed up for > 6 year(s)  
 19.9 % followed up for > 7 year(s)  
 0.16 % followed up for > 8 year(s)

Relevant symptom events:

625 total events  
 613 unique patients  
 12 admissions for symptom events  
 4.53 per 1000 person years crude IR  
 10 unique patients  
 Distribution of admissions for relevant symptoms:

```

n freq
0 603
1 9
3 1
Breakdown of admissions for symptoms:
  0 pain ( 0 patients)
  0 bleeding ( 0 patients)
  0 complication ( 0 patients)
 12 device ( 10 patients)

Further SUI interventions:
653 total events
613 unique patients
40 admissions for reintervention events
15.09 per 1000 person years crude IR
36 unique patients
Distribution of admissions for further mesh interventions:
n freq
0 577
1 32
2 4
Breakdown of further mesh interventions:
 25 introductions ( 24 patients)
  6 repairs ( 5 patients)
 11 removals ( 10 patients)
  0 renewals ( 0 patients)

Cross-tabulation of symptoms and re-intervention:
      Reop
Symptoms  0  1
          0 574 29
          1  3  7

Re-intervention or symptoms event analysis:
45 admissions for relevant events (in unique spells)
39 patients
16.98 per 1000 person years crude IR
Distribution of admissions for relevant events:
n freq
0 574
1 34
2 4
3 1

First relevant symptoms event analysis:
12 events after first event (e.g. censor after first admission for relevant symptoms)
613 first events
613 unique patients
10 rows with symptom event
0 rows with time=0 -> 0.5
0 events with time=0 -> 0.5
NA ( NA to NA ) years, 95% survival
0.983 ( 0.972 to 0.995 ) 5 year survival probability

First re-intervention event analysis:
40 events after first event (e.g. censor after re-intervention)
613 first events
613 unique patients
36 rows with re-intervention event
1 rows with time=0 -> 0.5
1 events with time=0 -> 0.5
3.27 ( 1.21 to 5.12 ) years, 95% survival
0.929 ( 0.905 to 0.953 ) 5 year survival probability

First relevant event survival analysis:
45 events after first event (e.g. censor after first symptoms or re-intervention)
613 first events
613 unique patients
39 rows with symptoms or re-intervention event
1 rows with time=0 -> 0.5
1 events with time=0 -> 0.5
2.09 ( 0.92 to 4.87 ) years, 95% survival
0.925 ( 0.901 to 0.949 ) 5 year survival probability

```

Confounded cohort

-----

24244 patients in cohort  
214 died in hospital  
24030 alive at end of study  
817 spells due to relevant symptoms  
1506 spells with SUI mesh intervention  
24244 patients in SUI cohort with index procedure  
37672865 total follow-up (days), 103142.7 years  
1553.9 days mean follow-up, 4.3 years  
1603 days median follow-up, 4.4 years  
91.2 % followed up for > 1 year(s)  
79.65 % followed up for > 2 year(s)  
67.95 % followed up for > 3 year(s)  
55.08 % followed up for > 4 year(s)  
41.13 % followed up for > 5 year(s)  
27.05 % followed up for > 6 year(s)  
13.19 % followed up for > 7 year(s)  
0.11 % followed up for > 8 year(s)

Relevant symptom events:

25061 total events  
24244 unique patients  
817 admissions for symptom events  
7.92 per 1000 person years crude IR  
640 unique patients

Distribution of admissions for relevant symptoms:

| n | freq  |
|---|-------|
| 0 | 23604 |
| 1 | 501   |
| 2 | 109   |
| 3 | 23    |
| 4 | 6     |
| 5 | 1     |

Breakdown of admissions for symptoms:

1 pain ( 1 patients)  
0 bleeding ( 0 patients)  
0 complication ( 0 patients)  
817 device ( 640 patients)

Further SUI interventions:

25750 total events  
24244 unique patients  
1506 admissions for reintervention events  
14.6 per 1000 person years crude IR  
1238 unique patients

Distribution of admissions for further mesh interventions:

| n | freq  |
|---|-------|
| 0 | 23006 |
| 1 | 1015  |
| 2 | 191   |
| 3 | 24    |
| 4 | 5     |
| 5 | 1     |
| 6 | 2     |

Breakdown of further mesh interventions:

494 introductions ( 478 patients)  
263 repairs ( 247 patients)  
778 removals ( 683 patients)  
2 renewals ( 2 patients)

Cross-tabulation of symptoms and re-intervention:

|          | Reop  |     |
|----------|-------|-----|
| Symptoms | 0     | 1   |
| 0        | 22859 | 745 |
| 1        | 147   | 493 |

Re-intervention or symptoms event analysis:

1780 admissions for relevant events (in unique spells)  
1385 patients  
17.26 per 1000 person years crude IR  
Distribution of admissions for relevant events:

| n | freq  |
|---|-------|
| 0 | 22859 |
| 1 | 1083  |
| 2 | 236   |
| 3 | 46    |
| 4 | 15    |
| 5 | 3     |
| 6 | 2     |

First relevant symptoms event analysis:

817 events after first event (e.g. censor after first admission for relevant symptoms)  
 24244 first events  
 24244 unique patients  
 640 rows with symptom event  
 2 rows with time=0 -> 0.5  
 0 events with time=0 -> 0.5  
 NA ( NA to NA ) years, 95% survival  
 0.97 ( 0.968 to 0.973 ) 5 year survival probability

First re-intervention event analysis:

1506 events after first event (e.g. censor after re-intervention)  
 24244 first events  
 24244 unique patients  
 1238 rows with re-intervention event  
 10 rows with time=0 -> 0.5  
 8 events with time=0 -> 0.5  
 3.3 ( 2.64 to 3.99 ) years, 95% survival  
 0.942 ( 0.939 to 0.945 ) 5 year survival probability

First relevant event survival analysis:

1780 events after first event (e.g. censor after first symptoms or re-intervention)  
 24244 first events  
 24244 unique patients  
 1385 rows with symptoms or re-intervention event  
 10 rows with time=0 -> 0.5  
 8 events with time=0 -> 0.5  
 2.3 ( 1.94 to 2.71 ) years, 95% survival  
 0.935 ( 0.932 to 0.939 ) 5 year survival probability

Confounded TVT, TOT or MS

-----

24184 patients in cohort  
 213 died in hospital  
 23971 alive at end of study  
 814 spells due to relevant symptoms  
 1498 spells with SUI mesh intervention  
 24184 patients in SUI cohort with index procedure  
 37573381 total follow-up (days), 102870.3 years  
 1553.6 days mean follow-up, 4.3 years  
 1603 days median follow-up, 4.4 years  
 91.21 % followed up for > 1 year(s)  
 79.64 % followed up for > 2 year(s)  
 67.93 % followed up for > 3 year(s)  
 55.07 % followed up for > 4 year(s)  
 41.12 % followed up for > 5 year(s)  
 27.04 % followed up for > 6 year(s)  
 13.17 % followed up for > 7 year(s)  
 0.11 % followed up for > 8 year(s)

Relevant symptom events:

24998 total events  
 24184 unique patients  
 814 admissions for symptom events  
 7.91 per 1000 person years crude IR  
 638 unique patients

Distribution of admissions for relevant symptoms:

| n | freq  |
|---|-------|
| 0 | 23546 |
| 1 | 500   |
| 2 | 108   |
| 3 | 23    |
| 4 | 6     |
| 5 | 1     |

Breakdown of admissions for symptoms:

1 pain ( 1 patients)  
0 bleeding ( 0 patients)  
0 complication ( 0 patients)  
814 device ( 638 patients)

Further SUI interventions:

25682 total events  
24184 unique patients  
1498 admissions for reintervention events  
14.56 per 1000 person years crude IR  
1231 unique patients

Distribution of admissions for further mesh interventions:

| n | freq  |
|---|-------|
| 0 | 22953 |
| 1 | 1009  |
| 2 | 190   |
| 3 | 24    |
| 4 | 5     |
| 5 | 1     |
| 6 | 2     |

Breakdown of further mesh interventions:

491 introductions ( 475 patients)  
262 repairs ( 246 patients)  
774 removals ( 679 patients)  
2 renewals ( 2 patients)

Cross-tabulation of symptoms and re-intervention:

|          | Reop  |     |
|----------|-------|-----|
| Symptoms | 0     | 1   |
| 0        | 22807 | 739 |
| 1        | 146   | 492 |

Re-intervention or symptoms event analysis:

1770 admissions for relevant events (in unique spells)  
1377 patients  
17.21 per 1000 person years crude IR  
Distribution of admissions for relevant events:

| n | freq  |
|---|-------|
| 0 | 22807 |
| 1 | 1077  |
| 2 | 234   |
| 3 | 46    |
| 4 | 15    |
| 5 | 3     |
| 6 | 2     |

First relevant symptoms event analysis:

814 events after first event (e.g. censor after first admission for relevant symptoms)  
24184 first events  
24184 unique patients  
638 rows with symptom event  
2 rows with time=0 -> 0.5  
0 events with time=0 -> 0.5  
NA ( NA to NA ) years, 95% survival  
0.97 ( 0.968 to 0.973 ) 5 year survival probability

First re-intervention event analysis:

1498 events after first event (e.g. censor after re-intervention)  
24184 first events  
24184 unique patients  
1231 rows with re-intervention event  
10 rows with time=0 -> 0.5  
8 events with time=0 -> 0.5  
3.33 ( 2.68 to 4.03 ) years, 95% survival  
0.942 ( 0.939 to 0.946 ) 5 year survival probability

First relevant event survival analysis:

1770 events after first event (e.g. censor after first symptoms or re-intervention)  
24184 first events  
24184 unique patients  
1377 rows with symptoms or re-intervention event  
10 rows with time=0 -> 0.5

8 events with time=0 -> 0.5  
2.34 ( 1.94 to 2.72 ) years, 95% survival  
0.936 ( 0.932 to 0.939 ) 5 year survival probability

Confounded TVT cohort

-----  
14768 patients in cohort  
131 died in hospital  
14637 alive at end of study  
506 spells due to relevant symptoms  
873 spells with SUI mesh intervention  
14768 patients in SUI cohort with index procedure  
22675836 total follow-up (days), 62083.06 years  
1535.5 days mean follow-up, 4.2 years  
1565 days median follow-up, 4.3 years  
90.68 % followed up for > 1 year(s)  
78.72 % followed up for > 2 year(s)  
66.68 % followed up for > 3 year(s)  
53.6 % followed up for > 4 year(s)  
40.37 % followed up for > 5 year(s)  
26.79 % followed up for > 6 year(s)  
13.48 % followed up for > 7 year(s)  
0.12 % followed up for > 8 year(s)

Relevant symptom events:

15274 total events  
14768 unique patients  
506 admissions for symptom events  
8.15 per 1000 person years crude IR  
395 unique patients

Distribution of admissions for relevant symptoms:

| n | freq  |
|---|-------|
| 0 | 14373 |
| 1 | 304   |
| 2 | 75    |
| 3 | 12    |
| 4 | 4     |

Breakdown of admissions for symptoms:

0 pain ( 0 patients)  
0 bleeding ( 0 patients)  
0 complication ( 0 patients)  
506 device ( 395 patients)

Further SUI interventions:

15641 total events  
14768 unique patients  
873 admissions for reintervention events  
14.06 per 1000 person years crude IR  
722 unique patients

Distribution of admissions for further mesh interventions:

| n | freq  |
|---|-------|
| 0 | 14046 |
| 1 | 592   |
| 2 | 113   |
| 3 | 14    |
| 4 | 2     |
| 5 | 1     |

Breakdown of further mesh interventions:

238 introductions ( 233 patients)  
143 repairs ( 138 patients)  
506 removals ( 448 patients)  
2 renewals ( 2 patients)

Cross-tabulation of symptoms and re-intervention:

|          | Reop  |     |
|----------|-------|-----|
| Symptoms | 0     | 1   |
| 0        | 13966 | 407 |
| 1        | 80    | 315 |

Re-intervention or symptoms event analysis:

1026 admissions for relevant events (in unique spells)  
802 patients  
16.53 per 1000 person years crude IR

Distribution of admissions for relevant events:

| n | freq  |
|---|-------|
| 0 | 13966 |
| 1 | 625   |
| 2 | 141   |
| 3 | 27    |
| 4 | 7     |
| 5 | 2     |

First relevant symptoms event analysis:

506 events after first event (e.g. censor after first admission for relevant symptoms)  
14768 first events  
14768 unique patients  
395 rows with symptom event  
1 rows with time=0 -> 0.5  
0 events with time=0 -> 0.5  
NA ( NA to NA ) years, 95% survival  
0.971 ( 0.968 to 0.974 ) 5 year survival probability

First re-intervention event analysis:

873 events after first event (e.g. censor after re-intervention)  
14768 first events  
14768 unique patients  
722 rows with re-intervention event  
5 rows with time=0 -> 0.5  
4 events with time=0 -> 0.5  
3.84 ( 2.84 to 4.69 ) years, 95% survival  
0.945 ( 0.941 to 0.949 ) 5 year survival probability

First relevant event survival analysis:

1026 events after first event (e.g. censor after first symptoms or re-intervention)  
14768 first events  
14768 unique patients  
802 rows with symptoms or re-intervention event  
5 rows with time=0 -> 0.5  
4 events with time=0 -> 0.5  
2.49 ( 1.92 to 3.45 ) years, 95% survival  
0.939 ( 0.935 to 0.944 ) 5 year survival probability

Confounded TOT cohort

-----

9195 patients in cohort  
80 died in hospital  
9115 alive at end of study  
301 spells due to relevant symptoms  
619 spells with SUI mesh intervention  
9195 patients in SUI cohort with index procedure  
14556153 total follow-up (days), 39852.57 years  
1583.1 days mean follow-up, 4.3 years  
1650 days median follow-up, 4.5 years  
92.13 % followed up for > 1 year(s)  
81.21 % followed up for > 2 year(s)  
70.06 % followed up for > 3 year(s)  
57.46 % followed up for > 4 year(s)  
42.31 % followed up for > 5 year(s)  
27.36 % followed up for > 6 year(s)  
12.58 % followed up for > 7 year(s)  
0.08 % followed up for > 8 year(s)

Relevant symptom events:

9496 total events  
9195 unique patients  
301 admissions for symptom events  
7.55 per 1000 person years crude IR  
237 unique patients

Distribution of admissions for relevant symptoms:

| n | freq |
|---|------|
| 0 | 8958 |
| 1 | 191  |
| 2 | 32   |
| 3 | 11   |
| 4 | 2    |
| 5 | 1    |



Breakdown of admissions for symptoms:  
1 pain ( 1 patients)  
0 bleeding ( 0 patients)  
0 complication ( 0 patients)  
301 device ( 237 patients)

Further SUI interventions:  
9814 total events  
9195 unique patients  
619 admissions for reintervention events  
15.53 per 1000 person years crude IR  
503 unique patients  
Distribution of admissions for further mesh interventions:  
n freq  
0 8692  
1 411  
2 77  
3 10  
4 3  
6 2  
Breakdown of further mesh interventions:  
250 introductions ( 239 patients)  
118 repairs ( 107 patients)  
266 removals ( 229 patients)  
0 renewals ( 0 patients)

Cross-tabulation of symptoms and re-intervention:  
Reop  
Symptoms 0 1  
0 8631 327  
1 61 176

Re-intervention or symptoms event analysis:  
732 admissions for relevant events (in unique spells)  
564 patients  
18.37 per 1000 person years crude IR  
Distribution of admissions for relevant events:  
n freq  
0 8631  
1 442  
2 92  
3 19  
4 8  
5 1  
6 2

First relevant symptoms event analysis:  
301 events after first event (e.g. censor after first admission for relevant symptoms)  
9195 first events  
9195 unique patients  
237 rows with symptom event  
1 rows with time=0 -> 0.5  
0 events with time=0 -> 0.5  
NA ( NA to NA ) years, 95% survival  
0.971 ( 0.967 to 0.974 ) 5 year survival probability

First re-intervention event analysis:  
619 events after first event (e.g. censor after re-intervention)  
9195 first events  
9195 unique patients  
503 rows with re-intervention event  
5 rows with time=0 -> 0.5  
4 events with time=0 -> 0.5  
2.66 ( 2.03 to 3.55 ) years, 95% survival  
0.937 ( 0.932 to 0.943 ) 5 year survival probability

First relevant event survival analysis:  
732 events after first event (e.g. censor after first symptoms or re-intervention)  
9195 first events  
9195 unique patients  
564 rows with symptoms or re-intervention event  
5 rows with time=0 -> 0.5  
4 events with time=0 -> 0.5

2.02 ( 1.69 to 2.64 ) years, 95% survival  
0.93 ( 0.924 to 0.936 ) 5 year survival probability

Confounded minisling cohort

-----  
221 patients in cohort  
2 died in hospital  
219 alive at end of study  
7 spells due to relevant symptoms  
6 spells with SUI mesh intervention  
221 patients in SUI cohort with index procedure  
341392 total follow-up (days), 934.6804 years  
1544.8 days mean follow-up, 4.2 years  
1541 days median follow-up, 4.2 years  
88.69 % followed up for > 1 year(s)  
76.02 % followed up for > 2 year(s)  
62.9 % followed up for > 3 year(s)  
53.85 % followed up for > 4 year(s)  
42.08 % followed up for > 5 year(s)  
30.77 % followed up for > 6 year(s)  
16.74 % followed up for > 7 year(s)  
0.45 % followed up for > 8 year(s)

Relevant symptom events:

228 total events  
221 unique patients  
7 admissions for symptom events  
7.49 per 1000 person years crude IR  
6 unique patients

Distribution of admissions for relevant symptoms:

| n | freq |
|---|------|
| 0 | 215  |
| 1 | 5    |
| 2 | 1    |

Breakdown of admissions for symptoms:

0 pain ( 0 patients)  
0 bleeding ( 0 patients)  
0 complication ( 0 patients)  
7 device ( 6 patients)

Further SUI interventions:

227 total events  
221 unique patients  
6 admissions for reintervention events  
6.42 per 1000 person years crude IR  
6 unique patients

Distribution of admissions for further mesh interventions:

| n | freq |
|---|------|
| 0 | 215  |
| 1 | 6    |

Breakdown of further mesh interventions:

3 introductions ( 3 patients)  
1 repairs ( 1 patients)  
2 removals ( 2 patients)  
0 renewals ( 0 patients)

Cross-tabulation of symptoms and re-intervention:

|          | Reop |     |
|----------|------|-----|
| Symptoms | 0    | 1   |
|          | 0    | 210 |
|          | 1    | 5   |
|          |      | 1   |

Re-intervention or symptoms event analysis:

12 admissions for relevant events (in unique spells)  
11 patients  
12.84 per 1000 person years crude IR

Distribution of admissions for relevant events:

| n | freq |
|---|------|
| 0 | 210  |
| 1 | 10   |
| 2 | 1    |

First relevant symptoms event analysis:

7 events after first event (e.g. censor after first admission for relevant symptoms)  
221 first events  
221 unique patients  
6 rows with symptom event  
0 rows with time=0 -> 0.5  
0 events with time=0 -> 0.5  
6.58 ( 4.52 to NA ) years, 95% survival  
0.96 ( 0.925 to 0.996 ) 5 year survival probability

First re-intervention event analysis:

6 events after first event (e.g. censor after re-intervention)  
221 first events  
221 unique patients  
6 rows with re-intervention event  
0 rows with time=0 -> 0.5  
0 events with time=0 -> 0.5  
NA ( 4.73 to NA ) years, 95% survival  
0.971 ( 0.945 to 0.998 ) 5 year survival probability

First relevant event survival analysis:

12 events after first event (e.g. censor after first symptoms or re-intervention)  
221 first events  
221 unique patients  
11 rows with symptoms or re-intervention event  
0 rows with time=0 -> 0.5  
0 events with time=0 -> 0.5  
4.53 ( 2.63 to NA ) years, 95% survival  
0.931 ( 0.888 to 0.975 ) 5 year survival probability

-----  
overall safety analysis  
-----

2866 spells with peri-procedural complication  
2180 spells with admission within 30 days for complication  
6355 unique spells with long-term admission for surgery or symptoms  
0 spells common to peri-procedure and 30 day admissions  
0 spells common to 30 day admissions and long-term admission  
0 spells common to peri-procedure and long-term admission

Unconfounded cohort:

68002 patients with first-time mesh insertion  
1618 with peri-procedural complication  
1137 with 30 day readmission for complication  
3542 with post-procedural admission for device or relevant surgery  
2639 with peri-procedural or 30 day complication, 3.88 %  
5915 with at least one of these, 8.7 %

Unconfounded TVT:

41880 patients with first-time mesh insertion  
1232 with peri-procedural complication  
833 with 30 day readmission for complication  
2248 with post-procedural admission for device or relevant surgery  
1983 with peri-procedural or 30 day complication, 4.73 %  
4028 with at least one of these, 9.62 %

Unconfounded TOT:

25509 patients with first-time mesh insertion  
356 with peri-procedural complication  
275 with 30 day readmission for complication  
1255 with post-procedural admission for device or relevant surgery  
601 with peri-procedural or 30 day complication, 2.36 %  
1796 with at least one of these, 7.04 %

Unconfounded MS:

613 patients with first-time mesh insertion  
30 with peri-procedural complication  
29 with 30 day readmission for complication  
39 with post-procedural admission for device or relevant surgery  
55 with peri-procedural or 30 day complication, 8.97 %  
91 with at least one of these, 14.85 %

Confounded cohort:

24244 patients with first-time mesh insertion  
1248 with peri-procedural complication  
739 with 30 day readmission for complication  
1385 with post-procedural admission for device or relevant surgery  
1893 with peri-procedural or 30 day complication, 7.81 %  
3105 with at least one of these, 12.81 %

Confounded TVT:

14768 patients with first-time mesh insertion  
880 with peri-procedural complication  
479 with 30 day readmission for complication  
802 with post-procedural admission for device or relevant surgery  
1295 with peri-procedural or 30 day complication, 8.77 %  
1987 with at least one of these, 13.45 %

Confounded TOT:

9195 patients with first-time mesh insertion  
342 with peri-procedural complication  
250 with 30 day readmission for complication  
564 with post-procedural admission for device or relevant surgery  
565 with peri-procedural or 30 day complication, 6.14 %  
1068 with at least one of these, 11.62 %

Confounded MS:

221 patients with first-time mesh insertion  
23 with peri-procedural complication  
9 with 30 day readmission for complication  
11 with post-procedural admission for device or relevant surgery  
29 with peri-procedural or 30 day complication, 13.12 %  
39 with at least one of these, 17.65 %

Combinations:

60 patients with first-time mesh insertion  
3 with peri-procedural complication  
1 with 30 day readmission for complication  
8 with post-procedural admission for device or relevant surgery  
4 with peri-procedural or 30 day complication, 6.67 %  
11 with at least one of these, 18.33 %

2016-07-14 18:33:18

Supplementary Table S7: ICD10 diagnosis codes used to classify peri-procedural complication types (‘.x’ represents any number from 0 to 9 indicating that the whole chapter is used)

| <i>Complication type</i>           | <i>ICD10 codes</i>                                                                                                                                                |
|------------------------------------|-------------------------------------------------------------------------------------------------------------------------------------------------------------------|
| Procedural                         | T81.x, (S34.5, S34.6, S34.8, S35.7, S35.8, S35.9, S36.5, S36.7, S36.8, S36.9, S37.0, S37.1, S37.2, S37.3, S37.7, S37.8, S37.9, S39.x) qualified by Y60.0 or Y60.8 |
| Device                             | T83.1, T83.4, T83.5, T83.6, T83.8, T83.9, T85.6, T85.7, T85.8, T85.9, any main code qualified by Y73.2 or Y73.3 or Y83.1 (excluding R30.x-R39.x)                  |
| Complication with urinary symptoms | R30.x-R39.x, N99.8, N99.9                                                                                                                                         |
| Other complications                | Any remaining complications identified by ICD10 codes not specified above.                                                                                        |

Supplementary Table S8: ICD10 diagnosis codes used in the primary diagnosis position to define admission for complication of mesh device implanted previously

| <i>Symptom type</i>                         | <i>ICD10 codes</i>                                                                         |
|---------------------------------------------|--------------------------------------------------------------------------------------------|
| Complication of device implanted previously | T83.1, T83.4, T83.5, T83.6, T83.7, T83.8, T83.9, any main code qualified by Y73.2 or Y73.3 |

Supplementary Table S9: The number of reported peri-procedural complications (% of occurrence) for the six most frequently reported overall during admissions for tension-free vaginal (TVT), trans-obturator (TOT) and suprapubic sling (SS) surgical mesh insertion in the absence of concomitant procedure likely to influence outcomes.

| <i>ICD10 subchapter</i> | <i>Description</i>                                                         | <i>TVT</i>   | <i>TOT</i>  | <i>SS</i>  |
|-------------------------|----------------------------------------------------------------------------|--------------|-------------|------------|
| T81                     | Complications of procedures not elsewhere classified                       | 643 (50.6)   | 91 (24.9)   | 21 (61.8)  |
| R33†                    | Retention of urine                                                         | 350 (27.5)   | 152 (41.6)  | 3 (8.8)    |
| N99                     | Post-procedural disorders of genitourinary system not elsewhere classified | 46 (3.6)     | 11 (3.0)    | 0 (0.0)    |
| T83                     | Complications of genitourinary prosthetic devices, implants and grafts     | 26 (2.0)     | 11 (3.0)    | 2 (5.9)    |
| S37†                    | Injury of urinary and pelvic organs                                        | 23 (1.8)     | 2 (0.5)     | 0 (0.0)    |
| T88                     | Other complications of surgical and medical care not elsewhere classified  | 14 (1.1)     | 9 (2.5)     | 0 (0.0)    |
| Total number reported   |                                                                            | 1271 (100.0) | 365 (100.0) | 34 (100.0) |

†Followed by one or more supplementary codes (from ICD-10 sub-chapter Y)

Supplementary Table S10: The number of reported peri-procedural complications (% of occurrence) for the six most frequently reported overall during admissions for tension-free vaginal (TVT), trans-obturator (TOT) and suprapubic sling (SS) surgical mesh insertion in the presence of concomitant procedures likely to influence outcomes.

| <i>ICD10 Subchapter</i> | <i>Description</i>                                                         | <i>TVT</i>  | <i>TOT</i>  | <i>SS</i>  |
|-------------------------|----------------------------------------------------------------------------|-------------|-------------|------------|
| T81                     | Complications of procedures not elsewhere classified                       | 484 (49.4)  | 166 (45.7)  | 20 (62.5)  |
| R33†                    | Retention of urine                                                         | 185 (18.9)  | 86 (23.7)   | 2 (6.3)    |
| T83                     | Complications of genitourinary prosthetic devices, implants and grafts     | 41 (4.2)    | 16 (4.4)    | 3 (9.4)    |
| N99                     | Post-procedural disorders of genitourinary system not elsewhere classified | 40 (4.1)    | 16 (4.4)    | 0 (0.0)    |
| N39†                    | Other disorders of urinary system                                          | 29 (3.0)    | 10 (2.8)    | 1 (3.1)    |
| T88                     | Other complications of surgical and medical care not elsewhere classified  | 12 (1.2)    | 5 (1.4)     | 0 (0.0)    |
| Total number reported   |                                                                            | 979 (100.0) | 363 (100.0) | 32 (100.0) |

†Followed by one or more supplementary codes (from ICD-10 sub-chapter Y)



Supplementary Table S11: Readmissions [patients, %] occurring within 30-days of index admissions for surgical mesh insertions conducted in the absence of concomitant procedures likely to influence outcomes.

|                                                        | <i>TVT</i> |              | <i>TOT</i> |             | <i>SS</i> |            |
|--------------------------------------------------------|------------|--------------|------------|-------------|-----------|------------|
| Total patients                                         | 41,880     |              | 25,509     |             | 613       |            |
| Total readmissions                                     | 4025       | [3255, 7.8]  | 1749       | [1485, 5.8] | 130       | [110,17.9] |
| Routine readmission                                    | 3094       | [2580, 6.1]  | 1440       | [1257, 4.9] | 97        | [85, 13.9] |
| - <i>catheter intervention</i>                         | 1369       |              | 546        |             | 50        |            |
| - <i>no intervention</i>                               | 970        |              | 417        |             | 28        |            |
| - <i>diagnostic/ imaging only</i>                      | 212        |              | 149        |             | 7         |            |
| - <i>further mesh surgery</i>                          | 138        |              | 62         |             | 3         |            |
| Readmission for complications                          | 931        | [833, 2.0]   | 309        | [275, 1.1]  | 33        | [29, 4.7]  |
| - <i>procedural</i>                                    | 253        |              | 86         |             | 18        |            |
| - <i>device</i>                                        | 233        |              | 81         |             | 5         |            |
| - <i>urinary complications</i>                         | 340        |              | 99         |             | 6         |            |
| - <i>other complications</i>                           | 151        |              | 60         |             | 6         |            |
| Readmission for complications and with further surgery | 144        | [141, 16.9†] | 31         | [30, 10.9†] | 0         | [0, 0.0]   |

†Percentage of patients readmitted for complications

Supplementary Table S12: Readmissions [patients, %] occurring within 30-days of index admissions for surgical mesh insertions conducted in the presence of concomitant procedures likely to influence outcomes.

|                                                        | <i>TVT</i> |              | <i>TOT</i> |            | <i>SS</i> |            |
|--------------------------------------------------------|------------|--------------|------------|------------|-----------|------------|
| Total patients                                         | 14,768     |              | 9195       |            | 221       |            |
| Total readmissions                                     | 1898       | [1502, 10.2] | 930        | [785, 8.5] | 70        | [54,24.4]  |
| Routine readmission                                    | 1369       | [1102, 7.5]  | 662        | [578, 6.3] | 60        | [46, 20.8] |
| - <i>catheter intervention</i>                         | 633        |              | 276        |            | 33        |            |
| - <i>no intervention</i>                               | 476        |              | 247        |            | 19        |            |
| - <i>diagnostic/ imaging only</i>                      | 81         |              | 49         |            | 3         |            |
| - <i>further mesh surgery</i>                          | 58         |              | 23         |            | 1         |            |
| Readmission for complications                          | 529        | [479, 3.2]   | 268        | [250, 2.7] | 10        | [9, 4.1]   |
| - <i>procedural</i>                                    | 256        |              | 145        |            | 6         |            |
| - <i>device</i>                                        | 89         |              | 42         |            | 1         |            |
| - <i>urinary complications</i>                         | 112        |              | 47         |            | 2         |            |
| - <i>other complications</i>                           | 93         |              | 44         |            | 2         |            |
| Readmission for complications and with further surgery | 61         | [61, 12.7†]  | 22         | [22, 8.8†] | 1         | [1, 10.0†] |

†Percentage of patients readmitted for complications

Supplementary Figure S13: Kaplan-Meier curve for time to first readmission for further mesh surgery or for complications from previous mesh surgery (solid lines) and 95% confidence limits (dashed lines) for those having TVT mesh insertions in the absence of concomitant procedures likely to influence outcome. Dash-dot lines indicate the proportions of patients free from mesh-related admission at 5 years (with 95% confidence intervals).

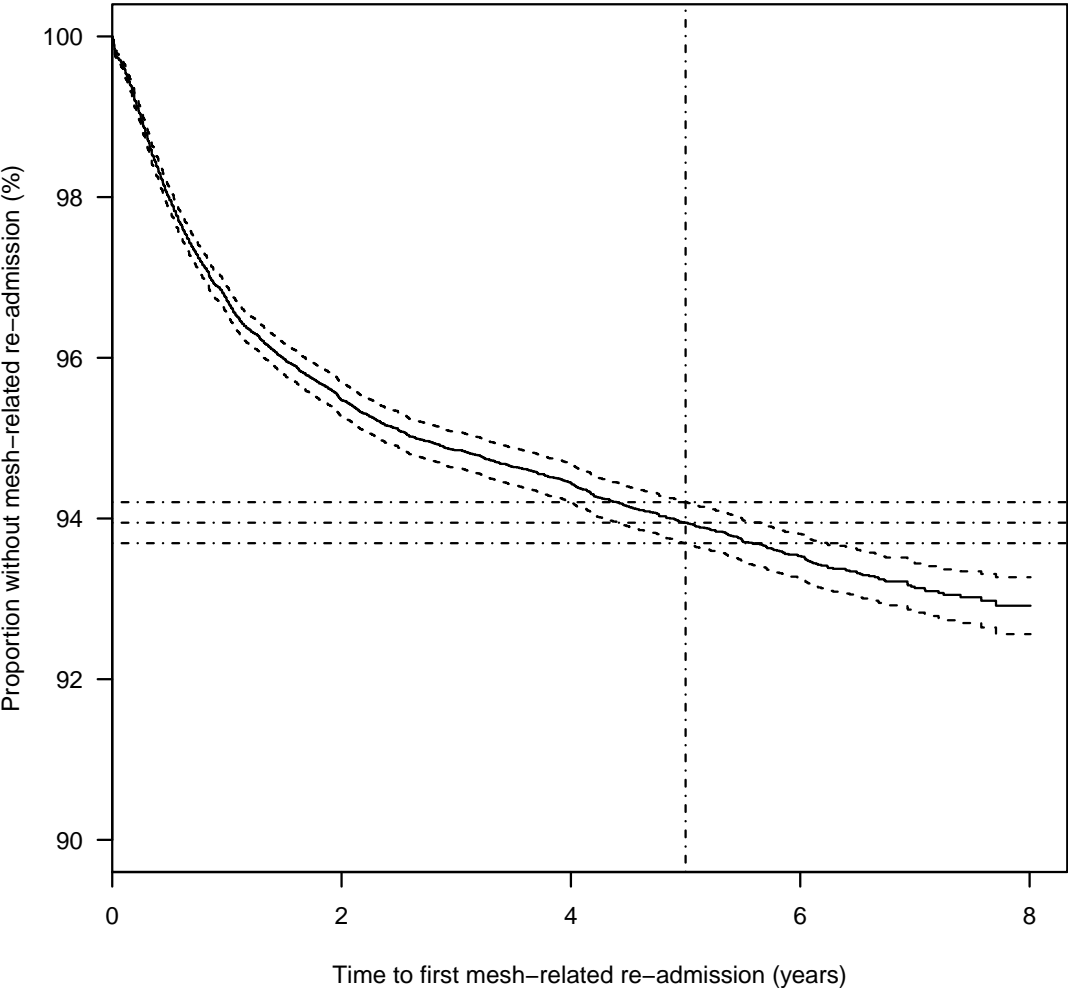

Supplementary Figure S14: Kaplan-Meier curve for time to first readmission for further mesh surgery or for complications from previous mesh surgery (solid lines) and 95% confidence limits (dashed lines) for those having TOT mesh insertion in the absence of concomitant procedures likely to influence outcomes. Dash-dot lines indicate the proportions of patients free from mesh-related admission at 5 years (with 95% confidence intervals).

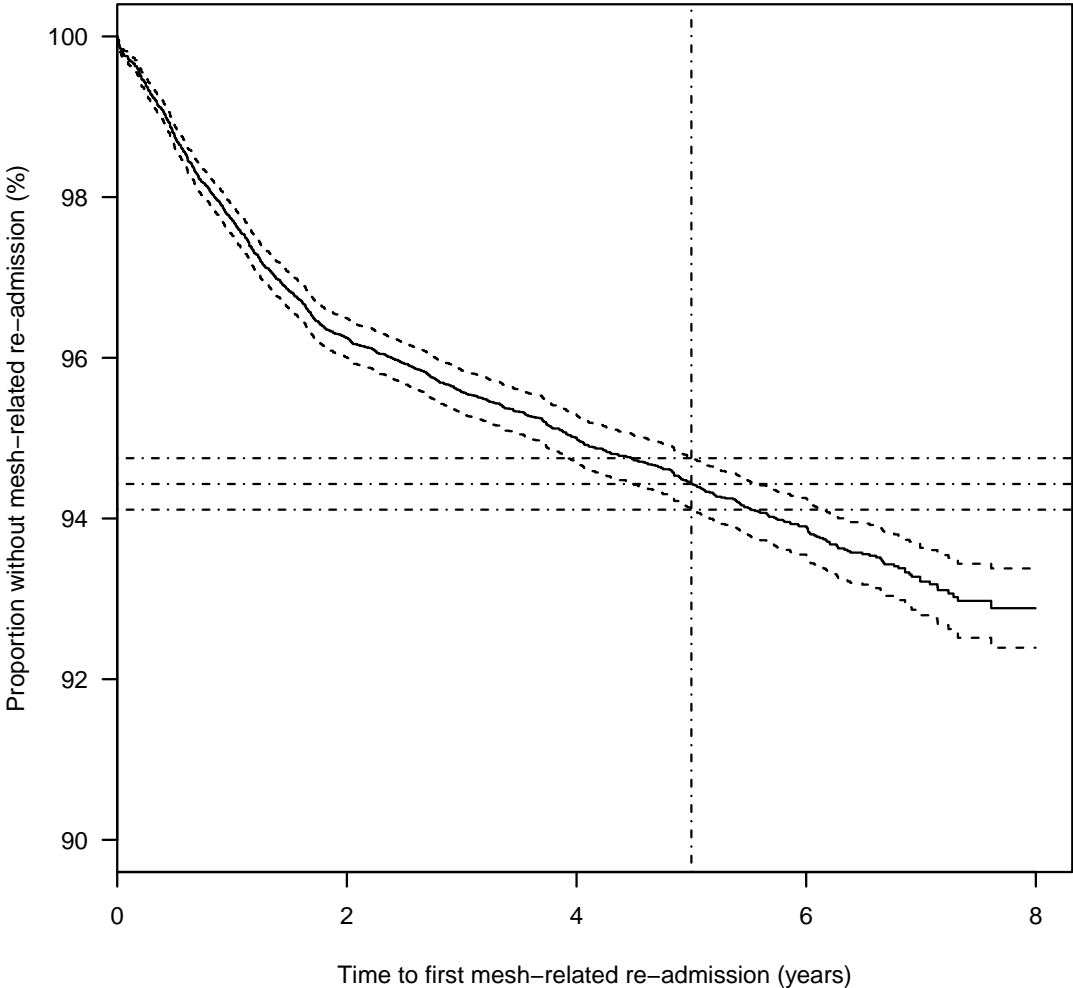

Supplementary Figure S15: Kaplan-Meier curve for time to first readmission for further mesh surgery or for complications from previous mesh surgery (solid lines) and 95% confidence limits (dashed lines) for those having SS mesh insertion in the absence of concomitant procedures likely to influence outcomes. Dash-dot lines indicate the proportions of patients free from mesh-related admission at 5 years (with 95% confidence intervals).

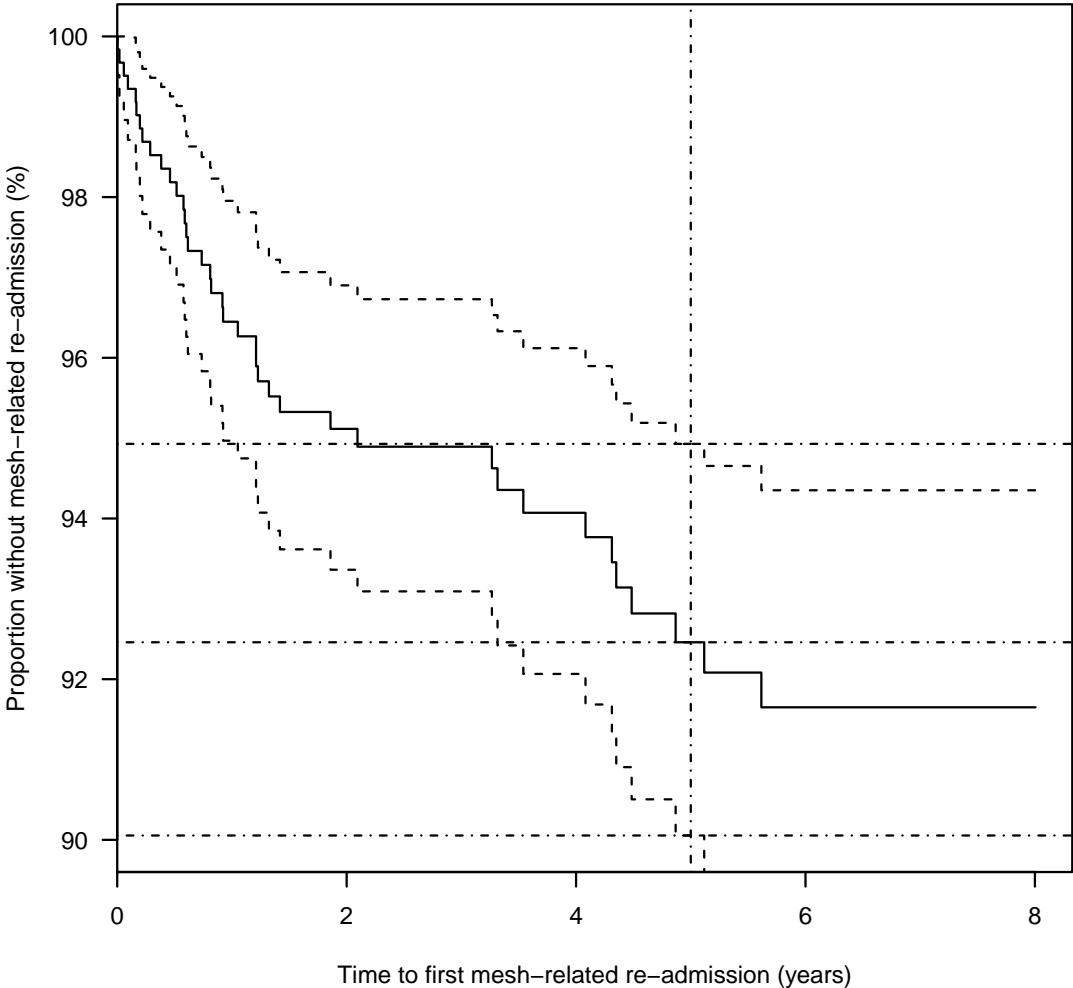

Supplementary Table S16: Cross-tabulations of the number (%) of patients having surgical mesh insertion, in the absence of concomitant procedures likely to influence outcomes, who were readmitted for further mesh surgery, or readmitted for complications of previous mesh surgery, during the study period.

| TVT cohort (n=41,880)                |     | Readmitted for complications of previous mesh surgery? |           |
|--------------------------------------|-----|--------------------------------------------------------|-----------|
|                                      |     | No                                                     | Yes       |
| Readmitted for further mesh surgery? | No  | 39,633 (94.6)                                          | 232 (0.6) |
|                                      | Yes | 1200 (2.9)                                             | 815 (1.9) |

  

| TOT cohort (n=25,509)                |     | Readmitted for complications of previous mesh surgery? |           |
|--------------------------------------|-----|--------------------------------------------------------|-----------|
|                                      |     | No                                                     | Yes       |
| Readmitted for further mesh surgery? | No  | 24,254 (95.1)                                          | 94 (0.4)  |
|                                      | Yes | 771 (3.0)                                              | 390 (1.5) |

  

| SS cohort (n=613)                    |     | Readmitted for complications of previous mesh surgery? |         |
|--------------------------------------|-----|--------------------------------------------------------|---------|
|                                      |     | No                                                     | Yes     |
| Readmitted for further mesh surgery? | No  | 574 (93.6)                                             | 3 (0.5) |
|                                      | Yes | 29 (4.7)                                               | 7 (1.1) |

  

| All (combined) (n=68,002)            |     | Readmitted for complications of previous mesh surgery? |            |
|--------------------------------------|-----|--------------------------------------------------------|------------|
|                                      |     | No                                                     | Yes        |
| Readmitted for further mesh surgery? | No  | 64,461 (94.8)                                          | 329 (0.5)  |
|                                      | Yes | 2000 (2.9)                                             | 1212 (1.8) |

Supplementary Table S17: The total number of patients (% , percentage of cohort) who had a transvaginal tape (TVT), transobturator tape (TOT) or suprapubic sling (SS) mesh insertion, in the presence of concomitant procedures, who were re-admitted during the study period for further mesh surgery or due to complications from previous mesh surgery. Results are uncorrected for censoring. For example, 802 of 14,768 (5.4%) patients who had a TVT mesh inserted were re-admitted at least once during the period of follow-up.

| Procedure type | Number of readmissions |            |           |          | Maximum number of readmissions |
|----------------|------------------------|------------|-----------|----------|--------------------------------|
|                | 0                      | 1          | 2         | 3+       |                                |
| TVT            | 13,966 (94.6)          | 625 (4.2)  | 141 (1.0) | 36 (0.2) | 5                              |
| TOT            | 8631 (93.9)            | 442 (4.8)  | 92 (1.0)  | 30 (0.3) | 6                              |
| SS             | 210 (95.0)             | 10 (4.5)   | 1 (0.5)   | 0 (0.0)  | 2                              |
| All (combined) | 22,807 (94.3)          | 1077 (4.4) | 234 (1.0) | 66 (0.3) | 6                              |

Supplementary Table S18: Reasons and frequency of readmission, following mesh insertion in the presence of concomitant procedures, during follow-up. The total number (% , percentage of cohort) of patients readmitted is also given (some patients were readmitted on multiple occasions).

|                                                                                                       | TVT                              |            | TOT                            |            | SS                         |           | All                               |             |
|-------------------------------------------------------------------------------------------------------|----------------------------------|------------|--------------------------------|------------|----------------------------|-----------|-----------------------------------|-------------|
|                                                                                                       | Total                            | Patients   | Total                          | Patients   | Total                      | Patients  | Total                             | Patients    |
| Total number of patients in cohort<br>(total duration of follow-up)                                   | 14,768<br>(62,083 patient years) |            | 9195<br>(39,852 patient years) |            | 221<br>(934 patient years) |           | 24,184<br>(102,870 patient years) |             |
| In-hospital deaths                                                                                    | -                                | 131 (0.9%) | -                              | 80 (0.9%)  | -                          | 2 (0.9%)  | -                                 | 213 (0.9%)  |
| <b>Readmissions</b> for further surgery:                                                              | 873                              | 722 (4.9%) | 619                            | 503 (5.5%) | 6                          | 6 (2.7%)  | 1498                              | 1231 (5.1%) |
| - <i>removal</i>                                                                                      | 506                              | 448 (3.0%) | 266                            | 229 (2.5%) | 2                          | 2 (0.9%)  | 774                               | 679 (2.8%)  |
| - <i>repair</i>                                                                                       | 143                              | 138 (0.9%) | 118                            | 107 (1.2%) | 1                          | 1 (0.5%)  | 262                               | 246 (1.0%)  |
| - <i>insertion</i>                                                                                    | 238                              | 233 (1.6%) | 250                            | 239 (2.6%) | 3                          | 3 (1.4%)  | 491                               | 475 (2.0%)  |
| - <i>renewal</i>                                                                                      | 2                                | 2 (0.0%)   | 0                              | 0 (0.0%)   | 0                          | 0 (0.0%)  | 2                                 | 2 (0.0%)    |
| <b>Readmissions</b> for complications<br>from mesh surgery                                            | 506                              | 395 (2.7%) | 301                            | 237 (2.6%) | 7                          | 6 (2.7%)  | 814                               | 638 (2.6%)  |
| <b>Readmissions</b> for complications <i>or</i><br>further surgery                                    | 1026                             | 802 (5.4%) | 732                            | 564 (6.1%) | 12                         | 11 (5.0%) | 1770                              | 1377 (5.7%) |
| <b>Readmissions</b> / 1000 person years:                                                              |                                  |            |                                |            |                            |           |                                   |             |
| - further mesh surgery                                                                                | 14.1                             | -          | 15.5                           | -          | 6.4                        | -         | 14.6                              | -           |
| - complications of mesh surgery                                                                       | 8.2                              | -          | 7.6                            | -          | 7.5                        | -         | 7.9                               | -           |
| - complications <u>or</u> further surgery                                                             | 16.5                             | -          | 18.4                           | -          | 12.8                       | -         | 17.2                              | -           |
| <b>Patients</b> free from further surgery<br>or admission for complications after<br>5 years [95% CI] | 93.9 [93.5-94.4] %               |            | 93.0 [92.4-93.6] %             |            | 93.1 [88.8-97.5] %         |           | 93.6 [93.2-93.9] %                |             |



Supplementary Figure S19: Hazard rate for readmission for further mesh surgery or for readmission due to complications from previous mesh surgery in those having surgical mesh insertion in the presence of concomitant procedures likely to influence outcomes. The instantaneous rate is in units of events per 1000 patient years.

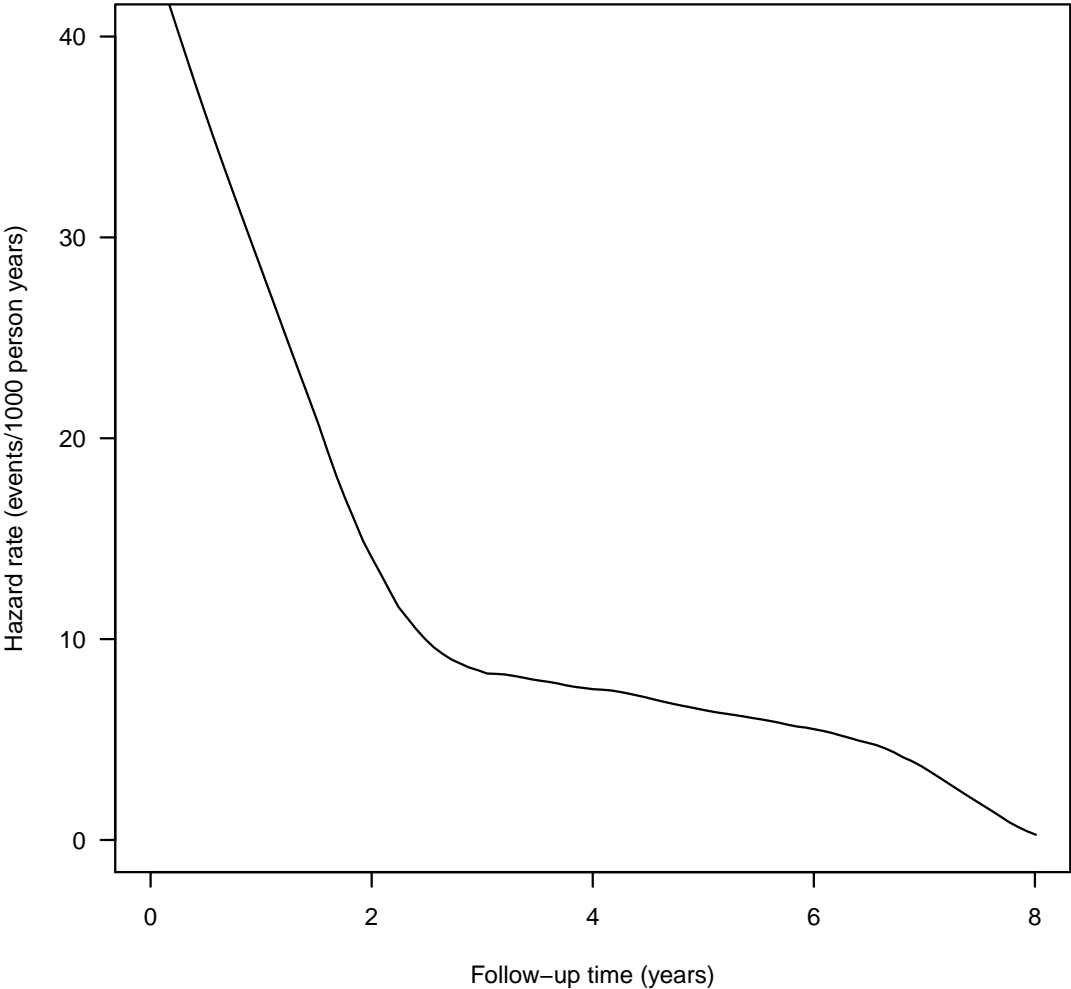

Supplementary Figure S20: Kaplan-Meier curve for time to first readmission for further mesh surgery or for complications from previous mesh surgery (solid lines) and 95% confidence limits (dashed lines) for those having surgical mesh insertion in the presence of concomitant procedures likely to influence outcomes. Dash-dot lines indicate the proportions of patients free from mesh-related admission at 5 years (with 95% confidence intervals).

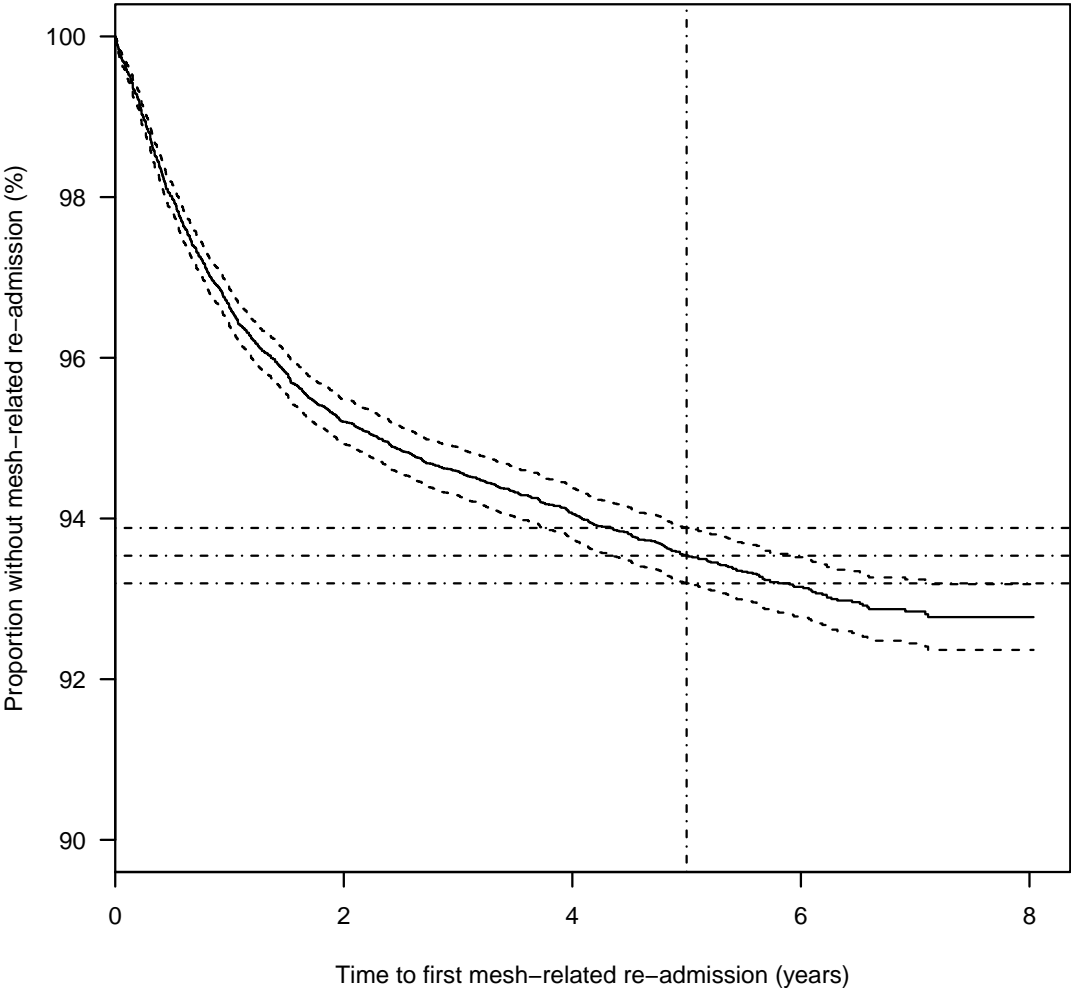

Supplement: 41598_2017_11821_MOESM1_ESM.pdf [file 41598_2017_11821_MOESM1_ESM.pdf]
